# Supplementary material for: Use of MALDI Mass Spectrometry Imaging to Identify Proteomic Signatures in Aortic Aneurysms after Endovascular Repair
Source: MDPI journal article supplement (doi:10.3390/biomedicines9091088), 2021-08-26
Supplement: s1 [file s1]

**Supplementary Figure S1. Differential intensity distributions of electron transfer flavoprotein subunit beta in all specimens** Relative peptide expression (color bar) is shown for MALDI  $m/z$  ion peaks. Red lines represents tunica media.

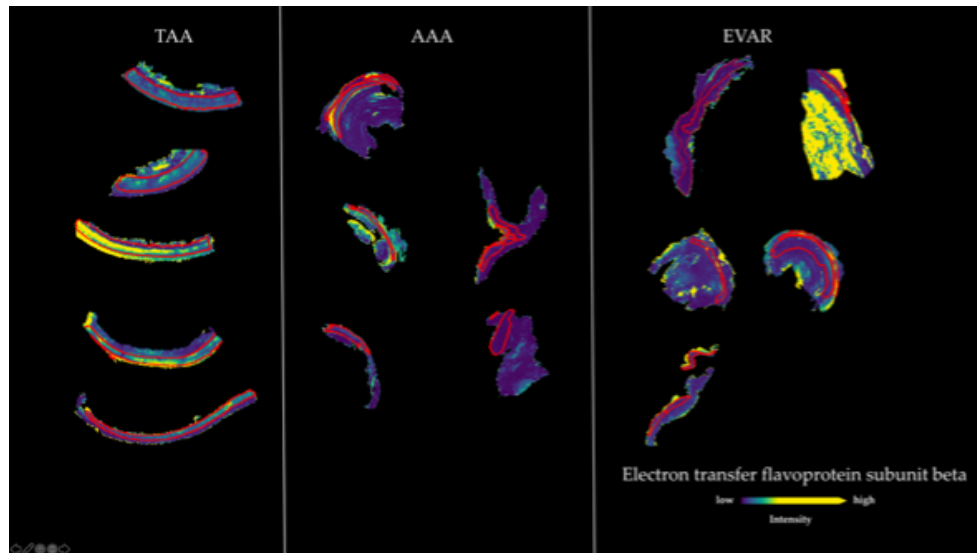

**Supplementary Figure S2. Differential intensity distributions of vimentin, tubulin, collagen alpha-1 (I) chain and desmin in TAA, AAA and EVAR specimens** Relative peptide expression (color bar) is shown for MALDI m/z ion peaks. Red lines represents tunica media and green lines represent tunica adventitia. Hematoxylin and eosin (H&E) staining in sections is shown for orientation.

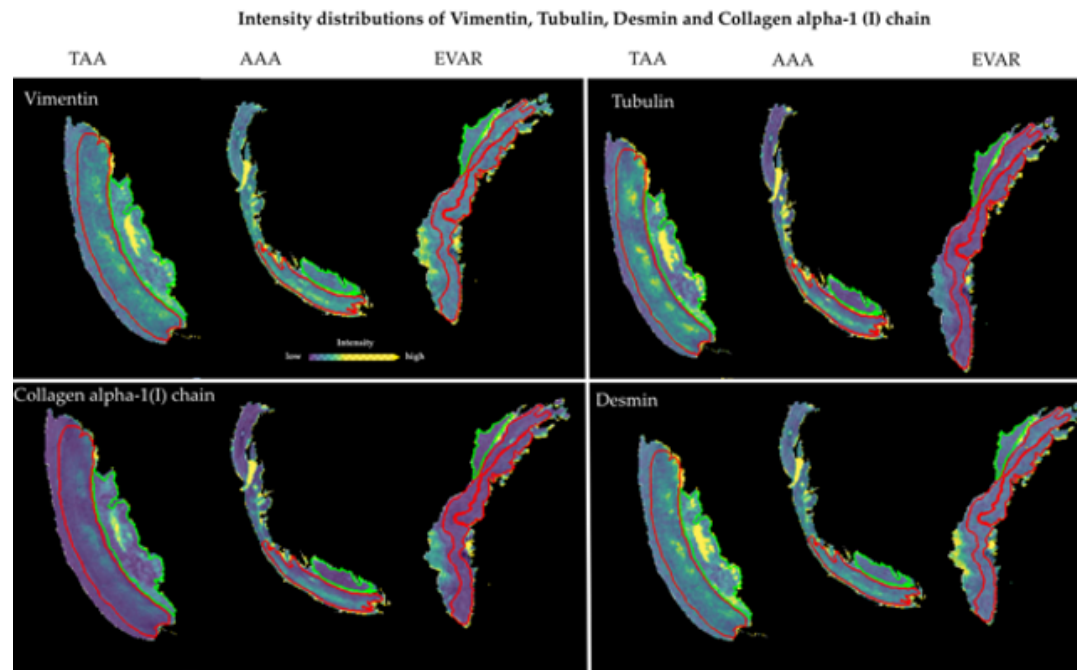

**Supplementary Table S1.** Overall differential intensity distributions of m/z values in TAA, AAA and EVAR specimens

| MALDI-MSI<br>value [Da]        | ROC [AUC] Adventitia<br>AAA vs EVAR | ROC [AUC] Adventitia<br>AAA vs TAA | ROC [AUC] Adventitia<br>EVAR vs EVAR vs TAA | ROC [AUC] Media<br>AAA vs EVAR | ROC [AUC] Media<br>AAA vs TAA | ROC [AUC] Media<br>EVAR vs EVAR vs TAA |
|--------------------------------|-------------------------------------|------------------------------------|---------------------------------------------|--------------------------------|-------------------------------|----------------------------------------|
| 602.396 m/z ± 0,47<br>0.154 Da |                                     | 0,41                               | 0,43                                        | 0,63                           | 0,40                          | 0,26                                   |
| 603.396 m/z ± 0,49<br>0.154 Da |                                     | 0,44                               | 0,44                                        | 0,59                           | 0,42                          | 0,31                                   |
| 616.197 m/z ± 0,54<br>0.154 Da |                                     | 0,61                               | 0,55                                        | 0,51                           | 0,57                          | 0,56                                   |
| 617.197 m/z ± 0,53<br>0.154 Da |                                     | 0,59                               | 0,56                                        | 0,50                           | 0,55                          | 0,54                                   |
| 618.397 m/z ± 0,49<br>0.154 Da |                                     | 0,40                               | 0,37                                        | 0,61                           | 0,40                          | 0,29                                   |
| 620.397 m/z ± 0,50<br>0.154 Da |                                     | 0,40                               | 0,40                                        | 0,62                           | 0,39                          | 0,25                                   |
| 628.398 m/z ± 0,47<br>0.154 Da |                                     | 0,43                               | 0,44                                        | 0,60                           | 0,40                          | 0,29                                   |
| 643.999 m/z ± 0,53<br>0.154 Da |                                     | 0,54                               | 0,52                                        | 0,54                           | 0,49                          | 0,43                                   |
| 644.399 m/z ± 0,49<br>0.154 Da |                                     | 0,41                               | 0,41                                        | 0,58                           | 0,42                          | 0,33                                   |
| 644.999 m/z ± 0,54<br>0.154 Da |                                     | 0,56                               | 0,51                                        | 0,54                           | 0,49                          | 0,42                                   |
| 645.399 m/z ± 0,49<br>0.154 Da |                                     | 0,42                               | 0,41                                        | 0,57                           | 0,42                          | 0,34                                   |
| 650 m/z ± 0,51                 |                                     | 0,49                               | 0,46                                        | 0,55                           | 0,49                          | 0,43                                   |

|               |      |      |      |      |      |      |
|---------------|------|------|------|------|------|------|
| 0.154 Da      |      |      |      |      |      |      |
| 651 m/z ±     | 0,52 | 0,50 | 0,49 | 0,54 | 0,50 | 0,46 |
| 0.154 Da      |      |      |      |      |      |      |
| 666.001 m/z ± | 0,53 | 0,53 | 0,49 | 0,52 | 0,52 | 0,50 |
| 0.154 Da      |      |      |      |      |      |      |
| 678.402 m/z ± | 0,44 | 0,37 | 0,41 | 0,57 | 0,43 | 0,34 |
| 0.154 Da      |      |      |      |      |      |      |
| 679.403 m/z ± | 0,46 | 0,40 | 0,41 | 0,55 | 0,46 | 0,38 |
| 0.154 Da      |      |      |      |      |      |      |
| 683.403 m/z ± | 0,53 | 0,57 | 0,54 | 0,55 | 0,51 | 0,45 |
| 0.154 Da      |      |      |      |      |      |      |
| 688.403 m/z ± | 0,51 | 0,51 | 0,48 | 0,61 | 0,44 | 0,33 |
| 0.154 Da      |      |      |      |      |      |      |
| 700.404 m/z ± | 0,51 | 0,47 | 0,46 | 0,55 | 0,44 | 0,39 |
| 0.154 Da      |      |      |      |      |      |      |
| 701.405 m/z ± | 0,49 | 0,47 | 0,48 | 0,55 | 0,38 | 0,33 |
| 0.154 Da      |      |      |      |      |      |      |
| 730.407 m/z ± | 0,50 | 0,43 | 0,42 | 0,58 | 0,40 | 0,32 |
| 0.154 Da      |      |      |      |      |      |      |
| 758.41 m/z ±  | 0,50 | 0,45 | 0,46 | 0,55 | 0,45 | 0,40 |
| 0.154 Da      |      |      |      |      |      |      |
| 759.41 m/z ±  | 0,46 | 0,45 | 0,50 | 0,52 | 0,48 | 0,46 |
| 0.154 Da      |      |      |      |      |      |      |
| 771.411 m/z ± | 0,52 | 0,44 | 0,41 | 0,57 | 0,45 | 0,36 |
| 0.154 Da      |      |      |      |      |      |      |
| 784.412 m/z ± | 0,51 | 0,46 | 0,45 | 0,58 | 0,45 | 0,37 |

|          |     |   |      |      |      |      |      |      |
|----------|-----|---|------|------|------|------|------|------|
| 0.154 Da |     |   |      |      |      |      |      |      |
| 785.412  | m/z | ± | 0,50 | 0,44 | 0,42 | 0,57 | 0,43 | 0,35 |
| 0.154 Da |     |   |      |      |      |      |      |      |
| 786.412  | m/z | ± | 0,50 | 0,45 | 0,44 | 0,55 | 0,44 | 0,38 |
| 0.154 Da |     |   |      |      |      |      |      |      |
| 795.413  | m/z | ± | 0,49 | 0,43 | 0,42 | 0,63 | 0,35 | 0,21 |
| 0.154 Da |     |   |      |      |      |      |      |      |
| 796.413  | m/z | ± | 0,48 | 0,43 | 0,44 | 0,62 | 0,39 | 0,27 |
| 0.154 Da |     |   |      |      |      |      |      |      |
| 815.415  | m/z | ± | 0,50 | 0,45 | 0,44 | 0,54 | 0,47 | 0,43 |
| 0.154 Da |     |   |      |      |      |      |      |      |
| 816.415  | m/z | ± | 0,45 | 0,46 | 0,51 | 0,53 | 0,46 | 0,42 |
| 0.154 Da |     |   |      |      |      |      |      |      |
| 817.415  | m/z | ± | 0,46 | 0,46 | 0,50 | 0,54 | 0,45 | 0,40 |
| 0.154 Da |     |   |      |      |      |      |      |      |
| 822.416  | m/z | ± | 0,49 | 0,51 | 0,50 | 0,52 | 0,47 | 0,45 |
| 0.154 Da |     |   |      |      |      |      |      |      |
| 823.416  | m/z | ± | 0,50 | 0,50 | 0,50 | 0,54 | 0,46 | 0,43 |
| 0.154 Da |     |   |      |      |      |      |      |      |
| 833.016  | m/z | ± | 0,54 | 0,56 | 0,52 | 0,55 | 0,49 | 0,44 |
| 0.154 Da |     |   |      |      |      |      |      |      |
| 833.417  | m/z | ± | 0,48 | 0,49 | 0,51 | 0,59 | 0,40 | 0,31 |
| 0.154 Da |     |   |      |      |      |      |      |      |
| 836.417  | m/z | ± | 0,52 | 0,43 | 0,41 | 0,59 | 0,42 | 0,31 |
| 0.154 Da |     |   |      |      |      |      |      |      |
| 837.417  | m/z | ± | 0,56 | 0,45 | 0,41 | 0,60 | 0,43 | 0,31 |

|                    |      |      |      |      |      |
|--------------------|------|------|------|------|------|
| 0.154 Da           |      |      |      |      |      |
| 838.417 m/z ± 0,50 | 0,44 | 0,44 | 0,57 | 0,45 | 0,38 |
| 0.154 Da           |      |      |      |      |      |
| 839.017 m/z ± 0,53 | 0,52 | 0,51 | 0,54 | 0,49 | 0,47 |
| 0.154 Da           |      |      |      |      |      |
| 840.417 m/z ± 0,47 | 0,45 | 0,48 | 0,59 | 0,48 | 0,38 |
| 0.154 Da           |      |      |      |      |      |
| 841.417 m/z ± 0,47 | 0,42 | 0,45 | 0,59 | 0,46 | 0,37 |
| 0.154 Da           |      |      |      |      |      |
| 842.417 m/z ± 0,52 | 0,45 | 0,46 | 0,55 | 0,42 | 0,39 |
| 0.154 Da           |      |      |      |      |      |
| 843.417 m/z ± 0,50 | 0,49 | 0,48 | 0,51 | 0,44 | 0,44 |
| 0.154 Da           |      |      |      |      |      |
| 852.418 m/z ± 0,54 | 0,45 | 0,42 | 0,61 | 0,40 | 0,28 |
| 0.154 Da           |      |      |      |      |      |
| 853.418 m/z ± 0,52 | 0,43 | 0,42 | 0,61 | 0,40 | 0,27 |
| 0.154 Da           |      |      |      |      |      |
| 854.418 m/z ± 0,51 | 0,43 | 0,41 | 0,60 | 0,42 | 0,32 |
| 0.154 Da           |      |      |      |      |      |
| 855.018 m/z ± 0,53 | 0,53 | 0,51 | 0,55 | 0,47 | 0,41 |
| 0.154 Da           |      |      |      |      |      |
| 856.019 m/z ± 0,52 | 0,53 | 0,51 | 0,56 | 0,47 | 0,41 |
| 0.154 Da           |      |      |      |      |      |
| 857.019 m/z ± 0,53 | 0,53 | 0,52 | 0,54 | 0,50 | 0,46 |
| 0.154 Da           |      |      |      |      |      |
| 861.019 m/z ± 0,51 | 0,49 | 0,48 | 0,52 | 0,50 | 0,48 |

|          |     |   |      |      |      |      |
|----------|-----|---|------|------|------|------|
| 0.154 Da |     |   |      |      |      |      |
| 862.019  | m/z | ± | 0,51 | 0,50 | 0,50 | 0,51 |
| 0.154 Da |     |   |      |      |      |      |
| 868.42   | m/z | ± | 0,50 | 0,42 | 0,43 | 0,59 |
| 0.154 Da |     |   |      |      |      |      |
| 869.42   | m/z | ± | 0,50 | 0,43 | 0,44 | 0,57 |
| 0.154 Da |     |   |      |      |      |      |
| 870.42   | m/z | ± | 0,51 | 0,44 | 0,42 | 0,56 |
| 0.154 Da |     |   |      |      |      |      |
| 871.02   | m/z | ± | 0,54 | 0,56 | 0,53 | 0,51 |
| 0.154 Da |     |   |      |      |      |      |
| 872.42   | m/z | ± | 0,52 | 0,45 | 0,43 | 0,55 |
| 0.154 Da |     |   |      |      |      |      |
| 874.42   | m/z | ± | 0,48 | 0,43 | 0,45 | 0,59 |
| 0.154 Da |     |   |      |      |      |      |
| 875.42   | m/z | ± | 0,51 | 0,48 | 0,46 | 0,57 |
| 0.154 Da |     |   |      |      |      |      |
| 877.02   | m/z | ± | 0,53 | 0,53 | 0,51 | 0,51 |
| 0.154 Da |     |   |      |      |      |      |
| 886.421  | m/z | ± | 0,49 | 0,40 | 0,41 | 0,56 |
| 0.154 Da |     |   |      |      |      |      |
| 887.421  | m/z | ± | 0,49 | 0,40 | 0,41 | 0,55 |
| 0.154 Da |     |   |      |      |      |      |
| 890.422  | m/z | ± | 0,54 | 0,49 | 0,45 | 0,57 |
| 0.154 Da |     |   |      |      |      |      |
| 891.422  | m/z | ± | 0,54 | 0,51 | 0,48 | 0,56 |

|                    |      |      |      |      |      |
|--------------------|------|------|------|------|------|
| 0.154 Da           |      |      |      |      |      |
| 898.422 m/z ± 0,54 | 0,51 | 0,46 | 0,55 | 0,46 | 0,41 |
| 0.154 Da           |      |      |      |      |      |
| 899.423 m/z ± 0,54 | 0,47 | 0,42 | 0,56 | 0,46 | 0,39 |
| 0.154 Da           |      |      |      |      |      |
| 904.423 m/z ± 0,50 | 0,53 | 0,54 | 0,46 | 0,47 | 0,52 |
| 0.154 Da           |      |      |      |      |      |
| 906.423 m/z ± 0,51 | 0,50 | 0,48 | 0,55 | 0,43 | 0,37 |
| 0.154 Da           |      |      |      |      |      |
| 944.427 m/z ± 0,53 | 0,51 | 0,48 | 0,57 | 0,45 | 0,37 |
| 0.154 Da           |      |      |      |      |      |
| 945.427 m/z ± 0,51 | 0,46 | 0,46 | 0,56 | 0,45 | 0,38 |
| 0.154 Da           |      |      |      |      |      |
| 946.427 m/z ± 0,47 | 0,44 | 0,47 | 0,56 | 0,49 | 0,43 |
| 0.154 Da           |      |      |      |      |      |
| 964.428 m/z ± 0,50 | 0,49 | 0,49 | 0,55 | 0,46 | 0,41 |
| 0.154 Da           |      |      |      |      |      |
| 974.429 m/z ± 0,49 | 0,46 | 0,44 | 0,56 | 0,43 | 0,38 |
| 0.154 Da           |      |      |      |      |      |
| 976.43 m/z ± 0,52  | 0,43 | 0,40 | 0,62 | 0,35 | 0,22 |
| 0.154 Da           |      |      |      |      |      |
| 980.43 m/z ± 0,49  | 0,52 | 0,52 | 0,44 | 0,49 | 0,55 |
| 0.154 Da           |      |      |      |      |      |
| 981.43 m/z ± 0,45  | 0,49 | 0,53 | 0,45 | 0,50 | 0,54 |
| 0.154 Da           |      |      |      |      |      |
| 982.43 m/z ± 0,48  | 0,50 | 0,52 | 0,52 | 0,48 | 0,46 |



|          |            |      |      |      |      |      |
|----------|------------|------|------|------|------|------|
| 0.154 Da |            |      |      |      |      |      |
| 1032.635 | m/z ± 0,43 | 0,49 | 0,55 | 0,46 | 0,49 | 0,53 |
| 0.154 Da |            |      |      |      |      |      |
| 1033.635 | m/z ± 0,42 | 0,48 | 0,58 | 0,45 | 0,47 | 0,52 |
| 0.154 Da |            |      |      |      |      |      |
| 1034.635 | m/z ± 0,47 | 0,51 | 0,53 | 0,46 | 0,49 | 0,52 |
| 0.154 Da |            |      |      |      |      |      |
| 1035.435 | m/z ± 0,53 | 0,55 | 0,53 | 0,48 | 0,46 | 0,48 |
| 0.154 Da |            |      |      |      |      |      |
| 1044.036 | m/z ± 0,53 | 0,54 | 0,51 | 0,55 | 0,50 | 0,46 |
| 0.154 Da |            |      |      |      |      |      |
| 1045.636 | m/z ± 0,48 | 0,46 | 0,48 | 0,49 | 0,47 | 0,48 |
| 0.154 Da |            |      |      |      |      |      |
| 1060.037 | m/z ± 0,51 | 0,53 | 0,53 | 0,53 | 0,49 | 0,42 |
| 0.154 Da |            |      |      |      |      |      |
| 1061.037 | m/z ± 0,54 | 0,55 | 0,51 | 0,54 | 0,48 | 0,43 |
| 0.154 Da |            |      |      |      |      |      |
| 1062.037 | m/z ± 0,53 | 0,55 | 0,50 | 0,55 | 0,50 | 0,45 |
| 0.154 Da |            |      |      |      |      |      |
| 1066.038 | m/z ± 0,55 | 0,53 | 0,49 | 0,57 | 0,48 | 0,42 |
| 0.154 Da |            |      |      |      |      |      |
| 1067.038 | m/z ± 0,53 | 0,52 | 0,50 | 0,54 | 0,49 | 0,45 |
| 0.154 Da |            |      |      |      |      |      |
| 1082.039 | m/z ± 0,51 | 0,52 | 0,51 | 0,51 | 0,52 | 0,52 |
| 0.154 Da |            |      |      |      |      |      |
| 1094.64  | m/z ± 0,52 | 0,40 | 0,37 | 0,63 | 0,37 | 0,23 |

|                     |      |      |      |      |      |
|---------------------|------|------|------|------|------|
| 0.154 Da            |      |      |      |      |      |
| 1095.64 m/z ± 0,45  | 0,38 | 0,42 | 0,58 | 0,39 | 0,31 |
| 0.154 Da            |      |      |      |      |      |
| 1096.64 m/z ± 0,51  | 0,43 | 0,40 | 0,59 | 0,42 | 0,32 |
| 0.154 Da            |      |      |      |      |      |
| 1097.641 m/z ± 0,50 | 0,44 | 0,43 | 0,55 | 0,45 | 0,40 |
| 0.154 Da            |      |      |      |      |      |
| 1105.641 m/z ± 0,47 | 0,40 | 0,41 | 0,60 | 0,42 | 0,31 |
| 0.154 Da            |      |      |      |      |      |
| 1106.641 m/z ± 0,41 | 0,36 | 0,42 | 0,58 | 0,42 | 0,32 |
| 0.154 Da            |      |      |      |      |      |
| 1107.641 m/z ± 0,50 | 0,40 | 0,40 | 0,61 | 0,44 | 0,31 |
| 0.154 Da            |      |      |      |      |      |
| 1108.642 m/z ± 0,51 | 0,44 | 0,43 | 0,56 | 0,45 | 0,38 |
| 0.154 Da            |      |      |      |      |      |
| 1111.642 m/z ± 0,48 | 0,42 | 0,43 | 0,61 | 0,36 | 0,26 |
| 0.154 Da            |      |      |      |      |      |
| 1112.642 m/z ± 0,50 | 0,43 | 0,42 | 0,62 | 0,39 | 0,26 |
| 0.154 Da            |      |      |      |      |      |
| 1113.642 m/z ± 0,44 | 0,43 | 0,50 | 0,55 | 0,42 | 0,37 |
| 0.154 Da            |      |      |      |      |      |
| 1116.442 m/z ± 0,54 | 0,45 | 0,41 | 0,56 | 0,45 | 0,40 |
| 0.154 Da            |      |      |      |      |      |
| 1117.442 m/z ± 0,53 | 0,47 | 0,44 | 0,54 | 0,44 | 0,40 |
| 0.154 Da            |      |      |      |      |      |
| 1118.442 m/z ± 0,53 | 0,50 | 0,47 | 0,53 | 0,47 | 0,45 |

|          |       |      |      |      |      |      |      |
|----------|-------|------|------|------|------|------|------|
| 0.154 Da |       |      |      |      |      |      |      |
| 1127.643 | m/z ± | 0,46 | 0,43 | 0,47 | 0,56 | 0,47 | 0,42 |
| 0.154 Da |       |      |      |      |      |      |      |
| 1133.444 | m/z ± | 0,51 | 0,50 | 0,47 | 0,59 | 0,43 | 0,34 |
| 0.154 Da |       |      |      |      |      |      |      |
| 1134.444 | m/z ± | 0,53 | 0,52 | 0,48 | 0,56 | 0,43 | 0,38 |
| 0.154 Da |       |      |      |      |      |      |      |
| 1138.644 | m/z ± | 0,43 | 0,38 | 0,43 | 0,59 | 0,35 | 0,25 |
| 0.154 Da |       |      |      |      |      |      |      |
| 1139.644 | m/z ± | 0,42 | 0,37 | 0,45 | 0,60 | 0,38 | 0,27 |
| 0.154 Da |       |      |      |      |      |      |      |
| 1140.644 | m/z ± | 0,47 | 0,42 | 0,45 | 0,60 | 0,41 | 0,31 |
| 0.154 Da |       |      |      |      |      |      |      |
| 1143.445 | m/z ± | 0,52 | 0,51 | 0,49 | 0,60 | 0,42 | 0,31 |
| 0.154 Da |       |      |      |      |      |      |      |
| 1144.445 | m/z ± | 0,47 | 0,47 | 0,49 | 0,58 | 0,45 | 0,36 |
| 0.154 Da |       |      |      |      |      |      |      |
| 1149.645 | m/z ± | 0,47 | 0,46 | 0,47 | 0,58 | 0,43 | 0,35 |
| 0.154 Da |       |      |      |      |      |      |      |
| 1150.645 | m/z ± | 0,49 | 0,49 | 0,50 | 0,56 | 0,43 | 0,38 |
| 0.154 Da |       |      |      |      |      |      |      |
| 1154.646 | m/z ± | 0,44 | 0,37 | 0,44 | 0,63 | 0,40 | 0,28 |
| 0.154 Da |       |      |      |      |      |      |      |
| 1155.446 | m/z ± | 0,51 | 0,48 | 0,48 | 0,57 | 0,45 | 0,38 |
| 0.154 Da |       |      |      |      |      |      |      |
| 1176.448 | m/z ± | 0,53 | 0,55 | 0,50 | 0,58 | 0,39 | 0,30 |

|                     |      |      |      |      |      |
|---------------------|------|------|------|------|------|
| 0.154 Da            |      |      |      |      |      |
| 1198.65 m/z ± 0,49  | 0,38 | 0,39 | 0,66 | 0,29 | 0,10 |
| 0.154 Da            |      |      |      |      |      |
| 1199.65 m/z ± 0,51  | 0,42 | 0,41 | 0,65 | 0,30 | 0,12 |
| 0.154 Da            |      |      |      |      |      |
| 1200.65 m/z ± 0,45  | 0,42 | 0,46 | 0,61 | 0,35 | 0,22 |
| 0.154 Da            |      |      |      |      |      |
| 1214.651 m/z ± 0,47 | 0,44 | 0,47 | 0,54 | 0,46 | 0,42 |
| 0.154 Da            |      |      |      |      |      |
| 1223.652 m/z ± 0,46 | 0,45 | 0,48 | 0,53 | 0,47 | 0,45 |
| 0.154 Da            |      |      |      |      |      |
| 1230.653 m/z ± 0,44 | 0,45 | 0,49 | 0,53 | 0,46 | 0,43 |
| 0.154 Da            |      |      |      |      |      |
| 1231.653 m/z ± 0,52 | 0,50 | 0,47 | 0,58 | 0,44 | 0,35 |
| 0.154 Da            |      |      |      |      |      |
| 1235.653 m/z ± 0,46 | 0,38 | 0,41 | 0,57 | 0,44 | 0,36 |
| 0.154 Da            |      |      |      |      |      |
| 1236.653 m/z ± 0,49 | 0,40 | 0,40 | 0,57 | 0,42 | 0,34 |
| 0.154 Da            |      |      |      |      |      |
| 1237.653 m/z ± 0,52 | 0,45 | 0,41 | 0,57 | 0,43 | 0,37 |
| 0.154 Da            |      |      |      |      |      |
| 1240.654 m/z ± 0,50 | 0,57 | 0,56 | 0,52 | 0,51 | 0,49 |
| 0.154 Da            |      |      |      |      |      |
| 1241.654 m/z ± 0,51 | 0,55 | 0,53 | 0,52 | 0,45 | 0,43 |
| 0.154 Da            |      |      |      |      |      |
| 1264.456 m/z ± 0,48 | 0,48 | 0,50 | 0,48 | 0,51 | 0,53 |

|                     |      |      |      |      |      |
|---------------------|------|------|------|------|------|
| 0.154 Da            |      |      |      |      |      |
| 1267.656 m/z ± 0,47 | 0,42 | 0,45 | 0,57 | 0,40 | 0,34 |
| 0.154 Da            |      |      |      |      |      |
| 1268.656 m/z ± 0,54 | 0,47 | 0,43 | 0,59 | 0,43 | 0,34 |
| 0.154 Da            |      |      |      |      |      |
| 1269.656 m/z ± 0,52 | 0,45 | 0,42 | 0,56 | 0,43 | 0,37 |
| 0.154 Da            |      |      |      |      |      |
| 1271.056 m/z ± 0,51 | 0,53 | 0,51 | 0,53 | 0,49 | 0,46 |
| 0.154 Da            |      |      |      |      |      |
| 1274.657 m/z ± 0,47 | 0,50 | 0,54 | 0,51 | 0,54 | 0,53 |
| 0.154 Da            |      |      |      |      |      |
| 1275.657 m/z ± 0,46 | 0,51 | 0,56 | 0,48 | 0,49 | 0,51 |
| 0.154 Da            |      |      |      |      |      |
| 1297.659 m/z ± 0,52 | 0,44 | 0,43 | 0,53 | 0,44 | 0,41 |
| 0.154 Da            |      |      |      |      |      |
| 1302.659 m/z ± 0,48 | 0,43 | 0,43 | 0,57 | 0,48 | 0,41 |
| 0.154 Da            |      |      |      |      |      |
| 1303.659 m/z ± 0,48 | 0,39 | 0,40 | 0,62 | 0,36 | 0,24 |
| 0.154 Da            |      |      |      |      |      |
| 1304.659 m/z ± 0,50 | 0,42 | 0,42 | 0,62 | 0,39 | 0,27 |
| 0.154 Da            |      |      |      |      |      |
| 1305.659 m/z ± 0,47 | 0,44 | 0,45 | 0,58 | 0,41 | 0,34 |
| 0.154 Da            |      |      |      |      |      |
| 1314.66 m/z ± 0,46  | 0,49 | 0,55 | 0,50 | 0,41 | 0,42 |
| 0.154 Da            |      |      |      |      |      |
| 1315.66 m/z ± 0,48  | 0,50 | 0,53 | 0,51 | 0,42 | 0,42 |

|                     |      |      |      |      |      |
|---------------------|------|------|------|------|------|
| 0.154 Da            |      |      |      |      |      |
| 1316.66 m/z ± 0,46  | 0,50 | 0,53 | 0,51 | 0,45 | 0,44 |
| 0.154 Da            |      |      |      |      |      |
| 1320.661 m/z ± 0,57 | 0,48 | 0,41 | 0,64 | 0,38 | 0,24 |
| 0.154 Da            |      |      |      |      |      |
| 1321.661 m/z ± 0,55 | 0,47 | 0,42 | 0,63 | 0,37 | 0,24 |
| 0.154 Da            |      |      |      |      |      |
| 1322.661 m/z ± 0,53 | 0,46 | 0,45 | 0,60 | 0,38 | 0,26 |
| 0.154 Da            |      |      |      |      |      |
| 1324.661 m/z ± 0,54 | 0,48 | 0,43 | 0,59 | 0,43 | 0,34 |
| 0.154 Da            |      |      |      |      |      |
| 1325.661 m/z ± 0,45 | 0,45 | 0,48 | 0,59 | 0,44 | 0,36 |
| 0.154 Da            |      |      |      |      |      |
| 1326.661 m/z ± 0,44 | 0,46 | 0,53 | 0,54 | 0,46 | 0,41 |
| 0.154 Da            |      |      |      |      |      |
| 1337.662 m/z ± 0,48 | 0,40 | 0,45 | 0,57 | 0,39 | 0,33 |
| 0.154 Da            |      |      |      |      |      |
| 1340.663 m/z ± 0,50 | 0,46 | 0,46 | 0,60 | 0,44 | 0,34 |
| 0.154 Da            |      |      |      |      |      |
| 1341.663 m/z ± 0,46 | 0,44 | 0,46 | 0,58 | 0,42 | 0,34 |
| 0.154 Da            |      |      |      |      |      |
| 1342.663 m/z ± 0,48 | 0,45 | 0,47 | 0,57 | 0,43 | 0,35 |
| 0.154 Da            |      |      |      |      |      |
| 1352.664 m/z ± 0,50 | 0,48 | 0,47 | 0,52 | 0,44 | 0,43 |
| 0.154 Da            |      |      |      |      |      |
| 1353.664 m/z ± 0,49 | 0,48 | 0,49 | 0,51 | 0,48 | 0,47 |

|                     |      |      |      |      |      |
|---------------------|------|------|------|------|------|
| 0.154 Da            |      |      |      |      |      |
| 1358.664 m/z ± 0,49 | 0,46 | 0,48 | 0,60 | 0,41 | 0,30 |
| 0.154 Da            |      |      |      |      |      |
| 1359.664 m/z ± 0,52 | 0,47 | 0,47 | 0,63 | 0,40 | 0,26 |
| 0.154 Da            |      |      |      |      |      |
| 1366.665 m/z ± 0,49 | 0,41 | 0,41 | 0,59 | 0,37 | 0,29 |
| 0.154 Da            |      |      |      |      |      |
| 1390.667 m/z ± 0,48 | 0,50 | 0,52 | 0,50 | 0,50 | 0,50 |
| 0.154 Da            |      |      |      |      |      |
| 1391.667 m/z ± 0,46 | 0,48 | 0,51 | 0,46 | 0,48 | 0,52 |
| 0.154 Da            |      |      |      |      |      |
| 1401.668 m/z ± 0,48 | 0,43 | 0,44 | 0,55 | 0,44 | 0,39 |
| 0.154 Da            |      |      |      |      |      |
| 1408.669 m/z ± 0,55 | 0,46 | 0,42 | 0,60 | 0,31 | 0,20 |
| 0.154 Da            |      |      |      |      |      |
| 1409.669 m/z ± 0,49 | 0,44 | 0,46 | 0,56 | 0,34 | 0,25 |
| 0.154 Da            |      |      |      |      |      |
| 1428.671 m/z ± 0,50 | 0,44 | 0,44 | 0,55 | 0,33 | 0,28 |
| 0.154 Da            |      |      |      |      |      |
| 1459.673 m/z ± 0,54 | 0,46 | 0,41 | 0,61 | 0,43 | 0,32 |
| 0.154 Da            |      |      |      |      |      |
| 1460.674 m/z ± 0,56 | 0,47 | 0,40 | 0,62 | 0,43 | 0,31 |
| 0.154 Da            |      |      |      |      |      |
| 1461.674 m/z ± 0,50 | 0,42 | 0,41 | 0,58 | 0,42 | 0,33 |
| 0.154 Da            |      |      |      |      |      |
| 1462.674 m/z ± 0,48 | 0,44 | 0,45 | 0,55 | 0,44 | 0,39 |

|                     |      |      |      |      |      |
|---------------------|------|------|------|------|------|
| 0.154 Da            |      |      |      |      |      |
| 1465.674 m/z ± 0,47 | 0,37 | 0,39 | 0,56 | 0,39 | 0,31 |
| 0.154 Da            |      |      |      |      |      |
| 1466.674 m/z ± 0,55 | 0,43 | 0,38 | 0,60 | 0,42 | 0,32 |
| 0.154 Da            |      |      |      |      |      |
| 1467.674 m/z ± 0,52 | 0,41 | 0,39 | 0,57 | 0,42 | 0,33 |
| 0.154 Da            |      |      |      |      |      |
| 1468.674 m/z ± 0,46 | 0,40 | 0,44 | 0,52 | 0,46 | 0,43 |
| 0.154 Da            |      |      |      |      |      |
| 1476.075 m/z ± 0,54 | 0,55 | 0,51 | 0,51 | 0,49 | 0,47 |
| 0.154 Da            |      |      |      |      |      |
| 1477.675 m/z ± 0,54 | 0,46 | 0,43 | 0,60 | 0,43 | 0,33 |
| 0.154 Da            |      |      |      |      |      |
| 1478.675 m/z ± 0,55 | 0,47 | 0,43 | 0,59 | 0,45 | 0,35 |
| 0.154 Da            |      |      |      |      |      |
| 1479.675 m/z ± 0,48 | 0,44 | 0,47 | 0,54 | 0,43 | 0,40 |
| 0.154 Da            |      |      |      |      |      |
| 1480.675 m/z ± 0,50 | 0,48 | 0,46 | 0,54 | 0,48 | 0,44 |
| 0.154 Da            |      |      |      |      |      |
| 1481.675 m/z ± 0,47 | 0,43 | 0,46 | 0,54 | 0,46 | 0,42 |
| 0.154 Da            |      |      |      |      |      |
| 1482.676 m/z ± 0,50 | 0,47 | 0,47 | 0,53 | 0,46 | 0,43 |
| 0.154 Da            |      |      |      |      |      |
| 1487.676 m/z ± 0,48 | 0,43 | 0,47 | 0,55 | 0,46 | 0,42 |
| 0.154 Da            |      |      |      |      |      |
| 1488.676 m/z ± 0,54 | 0,48 | 0,43 | 0,55 | 0,45 | 0,41 |



|                     |      |      |      |      |      |
|---------------------|------|------|------|------|------|
| 0.154 Da            |      |      |      |      |      |
| 1493.677 m/z ± 0,49 | 0,35 | 0,37 | 0,59 | 0,45 | 0,34 |
| 0.154 Da            |      |      |      |      |      |
| 1494.677 m/z ± 0,47 | 0,33 | 0,37 | 0,58 | 0,36 | 0,28 |
| 0.154 Da            |      |      |      |      |      |
| 1495.677 m/z ± 0,52 | 0,37 | 0,37 | 0,59 | 0,34 | 0,26 |
| 0.154 Da            |      |      |      |      |      |
| 1501.677 m/z ± 0,47 | 0,48 | 0,53 | 0,53 | 0,44 | 0,41 |
| 0.154 Da            |      |      |      |      |      |
| 1502.677 m/z ± 0,51 | 0,52 | 0,52 | 0,54 | 0,43 | 0,40 |
| 0.154 Da            |      |      |      |      |      |
| 1503.677 m/z ± 0,50 | 0,49 | 0,48 | 0,56 | 0,46 | 0,40 |
| 0.154 Da            |      |      |      |      |      |
| 1504.678 m/z ± 0,49 | 0,47 | 0,48 | 0,54 | 0,46 | 0,42 |
| 0.154 Da            |      |      |      |      |      |
| 1508.678 m/z ± 0,49 | 0,41 | 0,42 | 0,60 | 0,40 | 0,32 |
| 0.154 Da            |      |      |      |      |      |
| 1509.678 m/z ± 0,48 | 0,42 | 0,43 | 0,57 | 0,40 | 0,33 |
| 0.154 Da            |      |      |      |      |      |
| 1510.678 m/z ± 0,50 | 0,41 | 0,40 | 0,57 | 0,42 | 0,36 |
| 0.154 Da            |      |      |      |      |      |
| 1511.678 m/z ± 0,50 | 0,44 | 0,45 | 0,54 | 0,47 | 0,43 |
| 0.154 Da            |      |      |      |      |      |
| 1515.679 m/z ± 0,52 | 0,43 | 0,41 | 0,61 | 0,41 | 0,28 |
| 0.154 Da            |      |      |      |      |      |
| 1516.679 m/z ± 0,52 | 0,45 | 0,42 | 0,61 | 0,43 | 0,32 |

|                     |      |      |      |      |      |
|---------------------|------|------|------|------|------|
| 0.154 Da            |      |      |      |      |      |
| 1520.679 m/z ± 0,49 | 0,49 | 0,51 | 0,49 | 0,46 | 0,47 |
| 0.154 Da            |      |      |      |      |      |
| 1521.679 m/z ± 0,47 | 0,48 | 0,54 | 0,48 | 0,48 | 0,51 |
| 0.154 Da            |      |      |      |      |      |
| 1529.68 m/z ± 0,46  | 0,57 | 0,59 | 0,50 | 0,61 | 0,60 |
| 0.154 Da            |      |      |      |      |      |
| 1530.68 m/z ± 0,46  | 0,42 | 0,45 | 0,57 | 0,43 | 0,36 |
| 0.154 Da            |      |      |      |      |      |
| 1531.68 m/z ± 0,50  | 0,42 | 0,41 | 0,59 | 0,41 | 0,31 |
| 0.154 Da            |      |      |      |      |      |
| 1532.68 m/z ± 0,45  | 0,39 | 0,44 | 0,55 | 0,42 | 0,36 |
| 0.154 Da            |      |      |      |      |      |
| 1533.68 m/z ± 0,55  | 0,47 | 0,42 | 0,58 | 0,44 | 0,34 |
| 0.154 Da            |      |      |      |      |      |
| 1534.68 m/z ± 0,51  | 0,44 | 0,43 | 0,57 | 0,47 | 0,40 |
| 0.154 Da            |      |      |      |      |      |
| 1546.881 m/z ± 0,51 | 0,37 | 0,36 | 0,61 | 0,44 | 0,31 |
| 0.154 Da            |      |      |      |      |      |
| 1547.882 m/z ± 0,45 | 0,33 | 0,37 | 0,61 | 0,43 | 0,33 |
| 0.154 Da            |      |      |      |      |      |
| 1548.882 m/z ± 0,48 | 0,37 | 0,39 | 0,58 | 0,45 | 0,37 |
| 0.154 Da            |      |      |      |      |      |
| 1549.682 m/z ± 0,54 | 0,44 | 0,43 | 0,56 | 0,43 | 0,37 |
| 0.154 Da            |      |      |      |      |      |
| 1553.682 m/z ± 0,48 | 0,48 | 0,51 | 0,55 | 0,47 | 0,41 |

|          |       |      |      |      |      |      |      |
|----------|-------|------|------|------|------|------|------|
| 0.154 Da |       |      |      |      |      |      |      |
| 1561.883 | m/z ± | 0,48 | 0,38 | 0,39 | 0,60 | 0,48 | 0,37 |
| 0.154 Da |       |      |      |      |      |      |      |
| 1562.883 | m/z ± | 0,46 | 0,33 | 0,36 | 0,62 | 0,40 | 0,28 |
| 0.154 Da |       |      |      |      |      |      |      |
| 1563.883 | m/z ± | 0,47 | 0,35 | 0,36 | 0,62 | 0,41 | 0,28 |
| 0.154 Da |       |      |      |      |      |      |      |
| 1564.883 | m/z ± | 0,49 | 0,37 | 0,38 | 0,59 | 0,42 | 0,33 |
| 0.154 Da |       |      |      |      |      |      |      |
| 1565.883 | m/z ± | 0,45 | 0,38 | 0,42 | 0,54 | 0,44 | 0,40 |
| 0.154 Da |       |      |      |      |      |      |      |
| 1567.683 | m/z ± | 0,49 | 0,48 | 0,48 | 0,50 | 0,51 | 0,50 |
| 0.154 Da |       |      |      |      |      |      |      |
| 1568.683 | m/z ± | 0,48 | 0,43 | 0,43 | 0,54 | 0,45 | 0,41 |
| 0.154 Da |       |      |      |      |      |      |      |
| 1569.683 | m/z ± | 0,46 | 0,43 | 0,45 | 0,52 | 0,45 | 0,43 |
| 0.154 Da |       |      |      |      |      |      |      |
| 1572.684 | m/z ± | 0,49 | 0,49 | 0,52 | 0,52 | 0,47 | 0,46 |
| 0.154 Da |       |      |      |      |      |      |      |
| 1573.684 | m/z ± | 0,48 | 0,48 | 0,52 | 0,51 | 0,47 | 0,47 |
| 0.154 Da |       |      |      |      |      |      |      |
| 1580.684 | m/z ± | 0,54 | 0,45 | 0,41 | 0,56 | 0,45 | 0,39 |
| 0.154 Da |       |      |      |      |      |      |      |
| 1581.685 | m/z ± | 0,56 | 0,47 | 0,40 | 0,59 | 0,47 | 0,39 |
| 0.154 Da |       |      |      |      |      |      |      |
| 1582.685 | m/z ± | 0,53 | 0,46 | 0,42 | 0,53 | 0,45 | 0,41 |

|                     |      |      |      |      |      |
|---------------------|------|------|------|------|------|
| 0.154 Da            |      |      |      |      |      |
| 1584.685 m/z ± 0,47 | 0,43 | 0,45 | 0,55 | 0,46 | 0,40 |
| 0.154 Da            |      |      |      |      |      |
| 1585.685 m/z ± 0,49 | 0,42 | 0,43 | 0,57 | 0,42 | 0,35 |
| 0.154 Da            |      |      |      |      |      |
| 1586.685 m/z ± 0,57 | 0,47 | 0,42 | 0,61 | 0,44 | 0,32 |
| 0.154 Da            |      |      |      |      |      |
| 1587.685 m/z ± 0,50 | 0,43 | 0,42 | 0,57 | 0,43 | 0,35 |
| 0.154 Da            |      |      |      |      |      |
| 1588.685 m/z ± 0,52 | 0,46 | 0,44 | 0,55 | 0,43 | 0,39 |
| 0.154 Da            |      |      |      |      |      |
| 1589.685 m/z ± 0,51 | 0,47 | 0,46 | 0,53 | 0,47 | 0,45 |
| 0.154 Da            |      |      |      |      |      |
| 1602.686 m/z ± 0,52 | 0,47 | 0,44 | 0,56 | 0,44 | 0,37 |
| 0.154 Da            |      |      |      |      |      |
| 1605.687 m/z ± 0,54 | 0,54 | 0,50 | 0,50 | 0,50 | 0,50 |
| 0.154 Da            |      |      |      |      |      |
| 1606.687 m/z ± 0,51 | 0,51 | 0,48 | 0,51 | 0,49 | 0,49 |
| 0.154 Da            |      |      |      |      |      |
| 1607.687 m/z ± 0,51 | 0,48 | 0,47 | 0,53 | 0,50 | 0,47 |
| 0.154 Da            |      |      |      |      |      |
| 1608.687 m/z ± 0,50 | 0,47 | 0,44 | 0,52 | 0,46 | 0,44 |
| 0.154 Da            |      |      |      |      |      |
| 1619.688 m/z ± 0,55 | 0,48 | 0,43 | 0,56 | 0,49 | 0,42 |
| 0.154 Da            |      |      |      |      |      |
| 1620.688 m/z ± 0,52 | 0,45 | 0,44 | 0,54 | 0,47 | 0,43 |

|          |       |      |      |      |      |      |      |
|----------|-------|------|------|------|------|------|------|
| 0.154 Da |       |      |      |      |      |      |      |
| 1621.688 | m/z ± | 0,48 | 0,45 | 0,48 | 0,52 | 0,47 | 0,46 |
| 0.154 Da |       |      |      |      |      |      |      |
| 1623.688 | m/z ± | 0,52 | 0,48 | 0,47 | 0,58 | 0,44 | 0,35 |
| 0.154 Da |       |      |      |      |      |      |      |
| 1624.688 | m/z ± | 0,50 | 0,46 | 0,47 | 0,57 | 0,43 | 0,35 |
| 0.154 Da |       |      |      |      |      |      |      |
| 1627.689 | m/z ± | 0,49 | 0,43 | 0,43 | 0,55 | 0,45 | 0,40 |
| 0.154 Da |       |      |      |      |      |      |      |
| 1628.689 | m/z ± | 0,48 | 0,44 | 0,45 | 0,51 | 0,44 | 0,43 |
| 0.154 Da |       |      |      |      |      |      |      |
| 1637.89  | m/z ± | 0,51 | 0,46 | 0,45 | 0,57 | 0,44 | 0,38 |
| 0.154 Da |       |      |      |      |      |      |      |
| 1648.691 | m/z ± | 0,54 | 0,50 | 0,45 | 0,54 | 0,48 | 0,44 |
| 0.154 Da |       |      |      |      |      |      |      |
| 1652.891 | m/z ± | 0,48 | 0,45 | 0,46 | 0,56 | 0,51 | 0,45 |
| 0.154 Da |       |      |      |      |      |      |      |
| 1655.891 | m/z ± | 0,45 | 0,38 | 0,40 | 0,58 | 0,43 | 0,35 |
| 0.154 Da |       |      |      |      |      |      |      |
| 1656.891 | m/z ± | 0,47 | 0,39 | 0,40 | 0,58 | 0,44 | 0,35 |
| 0.154 Da |       |      |      |      |      |      |      |
| 1657.892 | m/z ± | 0,47 | 0,41 | 0,43 | 0,55 | 0,45 | 0,41 |
| 0.154 Da |       |      |      |      |      |      |      |
| 1658.892 | m/z ± | 0,49 | 0,44 | 0,43 | 0,54 | 0,47 | 0,43 |
| 0.154 Da |       |      |      |      |      |      |      |
| 1665.692 | m/z ± | 0,48 | 0,45 | 0,47 | 0,52 | 0,47 | 0,45 |

|          |       |      |      |      |      |      |      |
|----------|-------|------|------|------|------|------|------|
| 0.154 Da |       |      |      |      |      |      |      |
| 1666.692 | m/z ± | 0,50 | 0,47 | 0,47 | 0,53 | 0,47 | 0,44 |
| 0.154 Da |       |      |      |      |      |      |      |
| 1667.692 | m/z ± | 0,50 | 0,48 | 0,49 | 0,52 | 0,48 | 0,46 |
| 0.154 Da |       |      |      |      |      |      |      |
| 1669.893 | m/z ± | 0,47 | 0,38 | 0,39 | 0,56 | 0,41 | 0,34 |
| 0.154 Da |       |      |      |      |      |      |      |
| 1670.893 | m/z ± | 0,48 | 0,37 | 0,37 | 0,59 | 0,38 | 0,29 |
| 0.154 Da |       |      |      |      |      |      |      |
| 1671.893 | m/z ± | 0,48 | 0,39 | 0,39 | 0,57 | 0,41 | 0,34 |
| 0.154 Da |       |      |      |      |      |      |      |
| 1672.893 | m/z ± | 0,48 | 0,41 | 0,43 | 0,54 | 0,44 | 0,39 |
| 0.154 Da |       |      |      |      |      |      |      |
| 1682.894 | m/z ± | 0,48 | 0,46 | 0,48 | 0,50 | 0,47 | 0,48 |
| 0.154 Da |       |      |      |      |      |      |      |
| 1683.894 | m/z ± | 0,45 | 0,40 | 0,44 | 0,54 | 0,46 | 0,43 |
| 0.154 Da |       |      |      |      |      |      |      |
| 1684.894 | m/z ± | 0,44 | 0,38 | 0,41 | 0,54 | 0,45 | 0,41 |
| 0.154 Da |       |      |      |      |      |      |      |
| 1685.694 | m/z ± | 0,48 | 0,45 | 0,44 | 0,56 | 0,42 | 0,36 |
| 0.154 Da |       |      |      |      |      |      |      |
| 1686.694 | m/z ± | 0,47 | 0,44 | 0,46 | 0,55 | 0,41 | 0,36 |
| 0.154 Da |       |      |      |      |      |      |      |
| 1687.694 | m/z ± | 0,49 | 0,45 | 0,46 | 0,56 | 0,44 | 0,38 |
| 0.154 Da |       |      |      |      |      |      |      |
| 1690.694 | m/z ± | 0,51 | 0,48 | 0,44 | 0,55 | 0,44 | 0,40 |

|          |       |      |      |      |      |      |      |
|----------|-------|------|------|------|------|------|------|
| 0.154 Da |       |      |      |      |      |      |      |
| 1691.895 | m/z ± | 0,46 | 0,39 | 0,41 | 0,56 | 0,39 | 0,33 |
| 0.154 Da |       |      |      |      |      |      |      |
| 1692.895 | m/z ± | 0,45 | 0,40 | 0,41 | 0,58 | 0,44 | 0,36 |
| 0.154 Da |       |      |      |      |      |      |      |
| 1693.695 | m/z ± | 0,51 | 0,51 | 0,48 | 0,54 | 0,45 | 0,41 |
| 0.154 Da |       |      |      |      |      |      |      |
| 1694.695 | m/z ± | 0,54 | 0,54 | 0,47 | 0,57 | 0,45 | 0,39 |
| 0.154 Da |       |      |      |      |      |      |      |
| 1706.696 | m/z ± | 0,50 | 0,37 | 0,37 | 0,57 | 0,44 | 0,37 |
| 0.154 Da |       |      |      |      |      |      |      |
| 1707.696 | m/z ± | 0,53 | 0,41 | 0,38 | 0,58 | 0,45 | 0,36 |
| 0.154 Da |       |      |      |      |      |      |      |
| 1708.696 | m/z ± | 0,51 | 0,41 | 0,39 | 0,57 | 0,44 | 0,35 |
| 0.154 Da |       |      |      |      |      |      |      |
| 1709.696 | m/z ± | 0,48 | 0,41 | 0,43 | 0,55 | 0,43 | 0,39 |
| 0.154 Da |       |      |      |      |      |      |      |
| 1710.896 | m/z ± | 0,46 | 0,41 | 0,42 | 0,60 | 0,36 | 0,26 |
| 0.154 Da |       |      |      |      |      |      |      |
| 1711.896 | m/z ± | 0,52 | 0,46 | 0,43 | 0,63 | 0,39 | 0,25 |
| 0.154 Da |       |      |      |      |      |      |      |
| 1712.897 | m/z ± | 0,49 | 0,44 | 0,45 | 0,60 | 0,39 | 0,30 |
| 0.154 Da |       |      |      |      |      |      |      |
| 1723.697 | m/z ± | 0,51 | 0,48 | 0,46 | 0,57 | 0,42 | 0,35 |
| 0.154 Da |       |      |      |      |      |      |      |
| 1724.698 | m/z ± | 0,54 | 0,52 | 0,46 | 0,58 | 0,43 | 0,35 |

|          |       |      |      |      |      |      |      |
|----------|-------|------|------|------|------|------|------|
| 0.154 Da |       |      |      |      |      |      |      |
| 1728.698 | m/z ± | 0,52 | 0,48 | 0,44 | 0,56 | 0,45 | 0,40 |
| 0.154 Da |       |      |      |      |      |      |      |
| 1729.698 | m/z ± | 0,52 | 0,48 | 0,47 | 0,55 | 0,45 | 0,40 |
| 0.154 Da |       |      |      |      |      |      |      |
| 1731.698 | m/z ± | 0,52 | 0,52 | 0,49 | 0,55 | 0,45 | 0,41 |
| 0.154 Da |       |      |      |      |      |      |      |
| 1742.699 | m/z ± | 0,53 | 0,44 | 0,39 | 0,57 | 0,46 | 0,38 |
| 0.154 Da |       |      |      |      |      |      |      |
| 1743.699 | m/z ± | 0,53 | 0,43 | 0,42 | 0,59 | 0,47 | 0,38 |
| 0.154 Da |       |      |      |      |      |      |      |
| 1744.699 | m/z ± | 0,51 | 0,42 | 0,41 | 0,58 | 0,44 | 0,35 |
| 0.154 Da |       |      |      |      |      |      |      |
| 1745.699 | m/z ± | 0,53 | 0,46 | 0,43 | 0,59 | 0,44 | 0,34 |
| 0.154 Da |       |      |      |      |      |      |      |
| 1746.7   | m/z ± | 0,53 | 0,48 | 0,44 | 0,57 | 0,43 | 0,36 |
| 0.154 Da |       |      |      |      |      |      |      |
| 1751.9   | m/z ± | 0,46 | 0,38 | 0,41 | 0,56 | 0,42 | 0,35 |
| 0.154 Da |       |      |      |      |      |      |      |
| 1752.9   | m/z ± | 0,49 | 0,39 | 0,39 | 0,59 | 0,44 | 0,34 |
| 0.154 Da |       |      |      |      |      |      |      |
| 1753.9   | m/z ± | 0,46 | 0,39 | 0,42 | 0,56 | 0,46 | 0,39 |
| 0.154 Da |       |      |      |      |      |      |      |
| 1766.901 | m/z ± | 0,47 | 0,38 | 0,40 | 0,57 | 0,46 | 0,37 |
| 0.154 Da |       |      |      |      |      |      |      |
| 1767.902 | m/z ± | 0,49 | 0,39 | 0,38 | 0,57 | 0,47 | 0,39 |



|                     |      |      |      |      |      |  |
|---------------------|------|------|------|------|------|--|
| 0.154 Da            |      |      |      |      |      |  |
| 1768.902 m/z ± 0,47 | 0,39 | 0,42 | 0,54 | 0,47 | 0,42 |  |
| 0.154 Da            |      |      |      |      |      |  |
| 1775.902 m/z ± 0,50 | 0,41 | 0,40 | 0,59 | 0,46 | 0,35 |  |
| 0.154 Da            |      |      |      |      |      |  |
| 1776.902 m/z ± 0,49 | 0,40 | 0,42 | 0,59 | 0,46 | 0,35 |  |
| 0.154 Da            |      |      |      |      |      |  |
| 1777.902 m/z ± 0,47 | 0,38 | 0,41 | 0,56 | 0,44 | 0,37 |  |
| 0.154 Da            |      |      |      |      |      |  |
| 1782.703 m/z ± 0,47 | 0,46 | 0,49 | 0,55 | 0,46 | 0,40 |  |
| 0.154 Da            |      |      |      |      |      |  |
| 1790.904 m/z ± 0,47 | 0,39 | 0,42 | 0,57 | 0,36 | 0,27 |  |
| 0.154 Da            |      |      |      |      |      |  |
| 1791.904 m/z ± 0,51 | 0,42 | 0,41 | 0,59 | 0,36 | 0,26 |  |
| 0.154 Da            |      |      |      |      |      |  |
| 1797.904 m/z ± 0,49 | 0,46 | 0,44 | 0,57 | 0,46 | 0,40 |  |
| 0.154 Da            |      |      |      |      |      |  |
| 1798.904 m/z ± 0,50 | 0,44 | 0,44 | 0,57 | 0,45 | 0,38 |  |
| 0.154 Da            |      |      |      |      |      |  |
| 1816.906 m/z ± 0,45 | 0,33 | 0,36 | 0,59 | 0,44 | 0,32 |  |
| 0.154 Da            |      |      |      |      |      |  |
| 1817.906 m/z ± 0,49 | 0,36 | 0,36 | 0,60 | 0,45 | 0,31 |  |
| 0.154 Da            |      |      |      |      |      |  |
| 1818.906 m/z ± 0,49 | 0,37 | 0,38 | 0,60 | 0,46 | 0,34 |  |
| 0.154 Da            |      |      |      |      |      |  |
| 1819.906 m/z ± 0,49 | 0,42 | 0,42 | 0,59 | 0,47 | 0,38 |  |

|          |       |      |      |      |      |      |      |
|----------|-------|------|------|------|------|------|------|
| 0.154 Da |       |      |      |      |      |      |      |
| 1820.906 | m/z ± | 0,52 | 0,48 | 0,46 | 0,57 | 0,47 | 0,39 |
| 0.154 Da |       |      |      |      |      |      |      |
| 1821.906 | m/z ± | 0,52 | 0,50 | 0,47 | 0,56 | 0,46 | 0,40 |
| 0.154 Da |       |      |      |      |      |      |      |
| 1822.907 | m/z ± | 0,50 | 0,49 | 0,48 | 0,54 | 0,46 | 0,42 |
| 0.154 Da |       |      |      |      |      |      |      |
| 1832.907 | m/z ± | 0,50 | 0,37 | 0,36 | 0,60 | 0,42 | 0,30 |
| 0.154 Da |       |      |      |      |      |      |      |
| 1833.908 | m/z ± | 0,49 | 0,35 | 0,35 | 0,60 | 0,39 | 0,28 |
| 0.154 Da |       |      |      |      |      |      |      |
| 1834.908 | m/z ± | 0,46 | 0,35 | 0,38 | 0,59 | 0,42 | 0,32 |
| 0.154 Da |       |      |      |      |      |      |      |
| 1835.908 | m/z ± | 0,46 | 0,37 | 0,40 | 0,58 | 0,44 | 0,34 |
| 0.154 Da |       |      |      |      |      |      |      |
| 1836.908 | m/z ± | 0,47 | 0,40 | 0,42 | 0,57 | 0,46 | 0,37 |
| 0.154 Da |       |      |      |      |      |      |      |
| 1848.909 | m/z ± | 0,46 | 0,39 | 0,43 | 0,56 | 0,46 | 0,41 |
| 0.154 Da |       |      |      |      |      |      |      |
| 1850.909 | m/z ± | 0,52 | 0,46 | 0,44 | 0,59 | 0,44 | 0,34 |
| 0.154 Da |       |      |      |      |      |      |      |
| 1851.909 | m/z ± | 0,48 | 0,43 | 0,45 | 0,58 | 0,43 | 0,34 |
| 0.154 Da |       |      |      |      |      |      |      |
| 1852.909 | m/z ± | 0,45 | 0,41 | 0,45 | 0,56 | 0,45 | 0,38 |
| 0.154 Da |       |      |      |      |      |      |      |
| 1854.909 | m/z ± | 0,48 | 0,42 | 0,42 | 0,56 | 0,46 | 0,39 |

|                     |      |      |      |      |      |
|---------------------|------|------|------|------|------|
| 0.154 Da            |      |      |      |      |      |
| 1855.91 m/z ± 0,49  | 0,42 | 0,43 | 0,55 | 0,46 | 0,40 |
| 0.154 Da            |      |      |      |      |      |
| 1856.91 m/z ± 0,47  | 0,41 | 0,43 | 0,54 | 0,47 | 0,42 |
| 0.154 Da            |      |      |      |      |      |
| 1867.911 m/z ± 0,45 | 0,43 | 0,46 | 0,55 | 0,43 | 0,39 |
| 0.154 Da            |      |      |      |      |      |
| 1869.911 m/z ± 0,52 | 0,47 | 0,44 | 0,57 | 0,45 | 0,39 |
| 0.154 Da            |      |      |      |      |      |
| 1870.911 m/z ± 0,46 | 0,41 | 0,45 | 0,55 | 0,47 | 0,41 |
| 0.154 Da            |      |      |      |      |      |
| 1871.911 m/z ± 0,47 | 0,42 | 0,45 | 0,54 | 0,45 | 0,40 |
| 0.154 Da            |      |      |      |      |      |
| 1888.913 m/z ± 0,51 | 0,48 | 0,46 | 0,59 | 0,48 | 0,37 |
| 0.154 Da            |      |      |      |      |      |
| 1889.913 m/z ± 0,47 | 0,44 | 0,45 | 0,57 | 0,46 | 0,38 |
| 0.154 Da            |      |      |      |      |      |
| 1922.916 m/z ± 0,49 | 0,42 | 0,43 | 0,57 | 0,44 | 0,37 |
| 0.154 Da            |      |      |      |      |      |
| 1923.916 m/z ± 0,52 | 0,44 | 0,42 | 0,60 | 0,41 | 0,30 |
| 0.154 Da            |      |      |      |      |      |
| 1924.916 m/z ± 0,49 | 0,41 | 0,41 | 0,60 | 0,43 | 0,32 |
| 0.154 Da            |      |      |      |      |      |
| 1925.916 m/z ± 0,48 | 0,41 | 0,43 | 0,57 | 0,42 | 0,34 |
| 0.154 Da            |      |      |      |      |      |
| 1950.918 m/z ± 0,47 | 0,47 | 0,49 | 0,48 | 0,46 | 0,49 |

|          |            |      |      |      |      |      |
|----------|------------|------|------|------|------|------|
| 0.154 Da |            |      |      |      |      |      |
| 1951.918 | m/z ± 0,47 | 0,48 | 0,51 | 0,49 | 0,47 | 0,49 |
| 0.154 Da |            |      |      |      |      |      |
| 1952.918 | m/z ± 0,46 | 0,47 | 0,48 | 0,48 | 0,47 | 0,49 |
| 0.154 Da |            |      |      |      |      |      |
| 1961.919 | m/z ± 0,49 | 0,42 | 0,42 | 0,59 | 0,45 | 0,34 |
| 0.154 Da |            |      |      |      |      |      |
| 1962.919 | m/z ± 0,50 | 0,43 | 0,43 | 0,60 | 0,46 | 0,34 |
| 0.154 Da |            |      |      |      |      |      |
| 1963.919 | m/z ± 0,49 | 0,43 | 0,43 | 0,58 | 0,47 | 0,38 |
| 0.154 Da |            |      |      |      |      |      |
| 1964.919 | m/z ± 0,47 | 0,42 | 0,45 | 0,60 | 0,47 | 0,36 |
| 0.154 Da |            |      |      |      |      |      |
| 1966.92  | m/z ± 0,49 | 0,48 | 0,51 | 0,56 | 0,48 | 0,41 |
| 0.154 Da |            |      |      |      |      |      |
| 1967.92  | m/z ± 0,47 | 0,48 | 0,51 | 0,51 | 0,47 | 0,46 |
| 0.154 Da |            |      |      |      |      |      |
| 1992.922 | m/z ± 0,47 | 0,47 | 0,49 | 0,52 | 0,48 | 0,47 |
| 0.154 Da |            |      |      |      |      |      |
| 1993.922 | m/z ± 0,50 | 0,49 | 0,49 | 0,54 | 0,46 | 0,42 |
| 0.154 Da |            |      |      |      |      |      |
| 2003.923 | m/z ± 0,51 | 0,43 | 0,41 | 0,62 | 0,46 | 0,33 |
| 0.154 Da |            |      |      |      |      |      |
| 2004.923 | m/z ± 0,53 | 0,43 | 0,41 | 0,58 | 0,43 | 0,35 |
| 0.154 Da |            |      |      |      |      |      |
| 2005.923 | m/z ± 0,50 | 0,41 | 0,42 | 0,56 | 0,44 | 0,38 |

|          |       |      |      |      |      |      |      |
|----------|-------|------|------|------|------|------|------|
| 0.154 Da |       |      |      |      |      |      |      |
| 2026.925 | m/z ± | 0,49 | 0,50 | 0,50 | 0,55 | 0,53 | 0,48 |
| 0.154 Da |       |      |      |      |      |      |      |
| 2027.925 | m/z ± | 0,53 | 0,52 | 0,45 | 0,57 | 0,52 | 0,45 |
| 0.154 Da |       |      |      |      |      |      |      |
| 2028.925 | m/z ± | 0,52 | 0,49 | 0,47 | 0,55 | 0,50 | 0,44 |
| 0.154 Da |       |      |      |      |      |      |      |
| 2038.926 | m/z ± | 0,49 | 0,43 | 0,45 | 0,53 | 0,47 | 0,44 |
| 0.154 Da |       |      |      |      |      |      |      |
| 2039.926 | m/z ± | 0,47 | 0,39 | 0,41 | 0,54 | 0,48 | 0,44 |
| 0.154 Da |       |      |      |      |      |      |      |
| 2040.926 | m/z ± | 0,51 | 0,44 | 0,42 | 0,55 | 0,48 | 0,44 |
| 0.154 Da |       |      |      |      |      |      |      |
| 2041.926 | m/z ± | 0,52 | 0,46 | 0,45 | 0,56 | 0,44 | 0,38 |
| 0.154 Da |       |      |      |      |      |      |      |
| 2042.927 | m/z ± | 0,48 | 0,45 | 0,47 | 0,55 | 0,45 | 0,41 |
| 0.154 Da |       |      |      |      |      |      |      |
| 2056.128 | m/z ± | 0,47 | 0,38 | 0,39 | 0,58 | 0,50 | 0,42 |
| 0.154 Da |       |      |      |      |      |      |      |
| 2056.928 | m/z ± | 0,49 | 0,42 | 0,42 | 0,58 | 0,47 | 0,38 |
| 0.154 Da |       |      |      |      |      |      |      |
| 2057.928 | m/z ± | 0,54 | 0,45 | 0,40 | 0,59 | 0,47 | 0,37 |
| 0.154 Da |       |      |      |      |      |      |      |
| 2058.928 | m/z ± | 0,50 | 0,43 | 0,42 | 0,58 | 0,49 | 0,40 |
| 0.154 Da |       |      |      |      |      |      |      |
| 2059.928 | m/z ± | 0,48 | 0,42 | 0,43 | 0,55 | 0,49 | 0,44 |

|          |       |      |      |      |      |      |      |
|----------|-------|------|------|------|------|------|------|
| 0.154 Da |       |      |      |      |      |      |      |
| 2072.129 | m/z ± | 0,46 | 0,36 | 0,37 | 0,60 | 0,47 | 0,36 |
| 0.154 Da |       |      |      |      |      |      |      |
| 2073.129 | m/z ± | 0,44 | 0,35 | 0,37 | 0,59 | 0,45 | 0,35 |
| 0.154 Da |       |      |      |      |      |      |      |
| 2074.129 | m/z ± | 0,50 | 0,40 | 0,40 | 0,58 | 0,47 | 0,38 |
| 0.154 Da |       |      |      |      |      |      |      |
| 2078.93  | m/z ± | 0,49 | 0,45 | 0,45 | 0,55 | 0,49 | 0,43 |
| 0.154 Da |       |      |      |      |      |      |      |
| 2079.93  | m/z ± | 0,51 | 0,46 | 0,45 | 0,56 | 0,46 | 0,39 |
| 0.154 Da |       |      |      |      |      |      |      |
| 2088.931 | m/z ± | 0,51 | 0,47 | 0,46 | 0,56 | 0,45 | 0,39 |
| 0.154 Da |       |      |      |      |      |      |      |
| 2089.931 | m/z ± | 0,54 | 0,46 | 0,44 | 0,57 | 0,43 | 0,36 |
| 0.154 Da |       |      |      |      |      |      |      |
| 2094.931 | m/z ± | 0,48 | 0,43 | 0,43 | 0,60 | 0,45 | 0,33 |
| 0.154 Da |       |      |      |      |      |      |      |
| 2095.931 | m/z ± | 0,49 | 0,45 | 0,46 | 0,59 | 0,44 | 0,33 |
| 0.154 Da |       |      |      |      |      |      |      |
| 2096.931 | m/z ± | 0,49 | 0,47 | 0,47 | 0,58 | 0,46 | 0,38 |
| 0.154 Da |       |      |      |      |      |      |      |
| 2104.132 | m/z ± | 0,44 | 0,36 | 0,40 | 0,62 | 0,39 | 0,26 |
| 0.154 Da |       |      |      |      |      |      |      |
| 2105.132 | m/z ± | 0,44 | 0,36 | 0,41 | 0,62 | 0,38 | 0,24 |
| 0.154 Da |       |      |      |      |      |      |      |
| 2105.932 | m/z ± | 0,49 | 0,42 | 0,42 | 0,57 | 0,41 | 0,34 |

|          |       |      |      |      |      |      |      |
|----------|-------|------|------|------|------|------|------|
| 0.154 Da |       |      |      |      |      |      |      |
| 2106.932 | m/z ± | 0,50 | 0,43 | 0,42 | 0,55 | 0,43 | 0,38 |
| 0.154 Da |       |      |      |      |      |      |      |
| 2115.133 | m/z ± | 0,48 | 0,36 | 0,36 | 0,61 | 0,43 | 0,28 |
| 0.154 Da |       |      |      |      |      |      |      |
| 2116.133 | m/z ± | 0,49 | 0,37 | 0,38 | 0,61 | 0,42 | 0,29 |
| 0.154 Da |       |      |      |      |      |      |      |
| 2117.133 | m/z ± | 0,49 | 0,40 | 0,41 | 0,59 | 0,45 | 0,34 |
| 0.154 Da |       |      |      |      |      |      |      |
| 2118.133 | m/z ± | 0,52 | 0,43 | 0,38 | 0,60 | 0,47 | 0,36 |
| 0.154 Da |       |      |      |      |      |      |      |
| 2138.135 | m/z ± | 0,48 | 0,41 | 0,41 | 0,55 | 0,47 | 0,41 |
| 0.154 Da |       |      |      |      |      |      |      |
| 2154.137 | m/z ± | 0,44 | 0,42 | 0,46 | 0,56 | 0,46 | 0,39 |
| 0.154 Da |       |      |      |      |      |      |      |
| 2163.938 | m/z ± | 0,49 | 0,43 | 0,43 | 0,60 | 0,44 | 0,34 |
| 0.154 Da |       |      |      |      |      |      |      |
| 2164.938 | m/z ± | 0,53 | 0,48 | 0,43 | 0,59 | 0,43 | 0,33 |
| 0.154 Da |       |      |      |      |      |      |      |
| 2165.938 | m/z ± | 0,52 | 0,48 | 0,45 | 0,57 | 0,45 | 0,38 |
| 0.154 Da |       |      |      |      |      |      |      |
| 2198.941 | m/z ± | 0,49 | 0,44 | 0,42 | 0,56 | 0,49 | 0,43 |
| 0.154 Da |       |      |      |      |      |      |      |
| 2199.941 | m/z ± | 0,50 | 0,42 | 0,42 | 0,57 | 0,46 | 0,39 |
| 0.154 Da |       |      |      |      |      |      |      |
| 2200.941 | m/z ± | 0,48 | 0,43 | 0,45 | 0,54 | 0,49 | 0,44 |

|                     |      |      |      |      |      |
|---------------------|------|------|------|------|------|
| 0.154 Da            |      |      |      |      |      |
| 2215.942 m/z ± 0,52 | 0,40 | 0,36 | 0,60 | 0,39 | 0,29 |
| 0.154 Da            |      |      |      |      |      |
| 2217.142 m/z ± 0,48 | 0,34 | 0,34 | 0,59 | 0,35 | 0,26 |
| 0.154 Da            |      |      |      |      |      |
| 2218.142 m/z ± 0,45 | 0,33 | 0,37 | 0,57 | 0,38 | 0,31 |
| 0.154 Da            |      |      |      |      |      |
| 2219.143 m/z ± 0,43 | 0,34 | 0,40 | 0,53 | 0,43 | 0,40 |
| 0.154 Da            |      |      |      |      |      |
| 2437.162 m/z ± 0,51 | 0,48 | 0,47 | 0,53 | 0,50 | 0,47 |
| 0.154 Da            |      |      |      |      |      |
| 2454.164 m/z ± 0,48 | 0,43 | 0,45 | 0,56 | 0,53 | 0,47 |
| 0.154 Da            |      |      |      |      |      |
| 2455.164 m/z ± 0,51 | 0,45 | 0,46 | 0,56 | 0,51 | 0,45 |
| 0.154 Da            |      |      |      |      |      |
| 2456.164 m/z ± 0,51 | 0,46 | 0,43 | 0,58 | 0,51 | 0,42 |
| 0.154 Da            |      |      |      |      |      |
| 2457.164 m/z ± 0,50 | 0,45 | 0,44 | 0,55 | 0,51 | 0,46 |
| 0.154 Da            |      |      |      |      |      |
| 2461.165 m/z ± 0,48 | 0,43 | 0,46 | 0,62 | 0,46 | 0,33 |
| 0.154 Da            |      |      |      |      |      |
| 2462.165 m/z ± 0,47 | 0,43 | 0,44 | 0,61 | 0,44 | 0,31 |
| 0.154 Da            |      |      |      |      |      |
| 2463.165 m/z ± 0,52 | 0,46 | 0,45 | 0,62 | 0,45 | 0,32 |
| 0.154 Da            |      |      |      |      |      |
| 2470.165 m/z ± 0,53 | 0,46 | 0,44 | 0,55 | 0,48 | 0,43 |



|                     |      |      |      |      |      |
|---------------------|------|------|------|------|------|
| 0.154 Da            |      |      |      |      |      |
| 2471.165 m/z ± 0,48 | 0,44 | 0,43 | 0,55 | 0,50 | 0,44 |
| 0.154 Da            |      |      |      |      |      |
| 2477.166 m/z ± 0,50 | 0,44 | 0,43 | 0,61 | 0,43 | 0,31 |
| 0.154 Da            |      |      |      |      |      |
| 2478.166 m/z ± 0,47 | 0,42 | 0,44 | 0,61 | 0,43 | 0,32 |
| 0.154 Da            |      |      |      |      |      |
| 2479.166 m/z ± 0,49 | 0,45 | 0,47 | 0,58 | 0,44 | 0,36 |
| 0.154 Da            |      |      |      |      |      |
| 2493.167 m/z ± 0,49 | 0,43 | 0,42 | 0,59 | 0,45 | 0,35 |
| 0.154 Da            |      |      |      |      |      |
| 2498.168 m/z ± 0,50 | 0,46 | 0,45 | 0,55 | 0,49 | 0,44 |
| 0.154 Da            |      |      |      |      |      |
| 2510.169 m/z ± 0,51 | 0,45 | 0,43 | 0,55 | 0,48 | 0,42 |
| 0.154 Da            |      |      |      |      |      |
| 2511.169 m/z ± 0,47 | 0,44 | 0,47 | 0,53 | 0,51 | 0,48 |
| 0.154 Da            |      |      |      |      |      |
| 2520.17 m/z ± 0,48  | 0,45 | 0,46 | 0,52 | 0,51 | 0,48 |
| 0.154 Da            |      |      |      |      |      |
| 2521.17 m/z ± 0,49  | 0,46 | 0,46 | 0,53 | 0,50 | 0,47 |
| 0.154 Da            |      |      |      |      |      |
| 2674.184 m/z ± 0,51 | 0,51 | 0,50 | 0,58 | 0,52 | 0,44 |
| 0.154 Da            |      |      |      |      |      |
| 2675.184 m/z ± 0,50 | 0,47 | 0,45 | 0,60 | 0,51 | 0,40 |
| 0.154 Da            |      |      |      |      |      |
| 2676.184 m/z ± 0,54 | 0,49 | 0,46 | 0,62 | 0,50 | 0,38 |

|          |            |      |      |      |      |      |
|----------|------------|------|------|------|------|------|
| 0.154 Da |            |      |      |      |      |      |
| 2690.185 | m/z ± 0,53 | 0,49 | 0,46 | 0,59 | 0,52 | 0,40 |
| 0.154 Da |            |      |      |      |      |      |
| 2691.185 | m/z ± 0,50 | 0,47 | 0,46 | 0,59 | 0,50 | 0,39 |
| 0.154 Da |            |      |      |      |      |      |
| 2692.186 | m/z ± 0,51 | 0,47 | 0,46 | 0,59 | 0,48 | 0,37 |
| 0.154 Da |            |      |      |      |      |      |
| 2694.186 | m/z ± 0,45 | 0,44 | 0,47 | 0,53 | 0,49 | 0,47 |
| 0.154 Da |            |      |      |      |      |      |
| 2704.187 | m/z ± 0,49 | 0,47 | 0,48 | 0,54 | 0,53 | 0,48 |
| 0.154 Da |            |      |      |      |      |      |
| 2705.187 | m/z ± 0,52 | 0,46 | 0,44 | 0,58 | 0,54 | 0,45 |
| 0.154 Da |            |      |      |      |      |      |
| 2706.187 | m/z ± 0,51 | 0,42 | 0,41 | 0,58 | 0,54 | 0,44 |
| 0.154 Da |            |      |      |      |      |      |
| 2707.187 | m/z ± 0,53 | 0,44 | 0,43 | 0,58 | 0,55 | 0,45 |
| 0.154 Da |            |      |      |      |      |      |
| 2708.187 | m/z ± 0,49 | 0,42 | 0,43 | 0,54 | 0,53 | 0,49 |
| 0.154 Da |            |      |      |      |      |      |
| 2721.188 | m/z ± 0,47 | 0,42 | 0,44 | 0,55 | 0,48 | 0,41 |
| 0.154 Da |            |      |      |      |      |      |
| 2727.189 | m/z ± 0,50 | 0,48 | 0,47 | 0,53 | 0,51 | 0,49 |
| 0.154 Da |            |      |      |      |      |      |
| 2728.189 | m/z ± 0,51 | 0,46 | 0,45 | 0,52 | 0,51 | 0,48 |
| 0.154 Da |            |      |      |      |      |      |
| 2729.189 | m/z ± 0,47 | 0,45 | 0,47 | 0,51 | 0,51 | 0,49 |

|          |     |   |      |      |      |      |      |      |
|----------|-----|---|------|------|------|------|------|------|
| 0.154 Da |     |   |      |      |      |      |      |      |
| 2730.189 | m/z | ± | 0,50 | 0,47 | 0,49 | 0,51 | 0,51 | 0,50 |
| 0.154 Da |     |   |      |      |      |      |      |      |
| 2744.19  | m/z | ± | 0,49 | 0,46 | 0,47 | 0,54 | 0,54 | 0,48 |
| 0.154 Da |     |   |      |      |      |      |      |      |
| 2745.19  | m/z | ± | 0,48 | 0,46 | 0,47 | 0,52 | 0,52 | 0,50 |
| 0.154 Da |     |   |      |      |      |      |      |      |
| 2869.402 | m/z | ± | 0,51 | 0,39 | 0,37 | 0,62 | 0,43 | 0,29 |
| 0.154 Da |     |   |      |      |      |      |      |      |
| 2870.402 | m/z | ± | 0,49 | 0,36 | 0,37 | 0,61 | 0,40 | 0,26 |
| 0.154 Da |     |   |      |      |      |      |      |      |
| 2871.402 | m/z | ± | 0,47 | 0,34 | 0,36 | 0,61 | 0,42 | 0,29 |
| 0.154 Da |     |   |      |      |      |      |      |      |
| 2872.402 | m/z | ± | 0,46 | 0,36 | 0,39 | 0,58 | 0,43 | 0,34 |
| 0.154 Da |     |   |      |      |      |      |      |      |
| 2885.403 | m/z | ± | 0,47 | 0,45 | 0,47 | 0,57 | 0,60 | 0,53 |
| 0.154 Da |     |   |      |      |      |      |      |      |
| 2886.403 | m/z | ± | 0,46 | 0,47 | 0,50 | 0,54 | 0,61 | 0,56 |
| 0.154 Da |     |   |      |      |      |      |      |      |
| 2887.403 | m/z | ± | 0,49 | 0,49 | 0,52 | 0,55 | 0,61 | 0,55 |
| 0.154 Da |     |   |      |      |      |      |      |      |
| 2950.409 | m/z | ± | 0,48 | 0,41 | 0,42 | 0,62 | 0,41 | 0,27 |
| 0.154 Da |     |   |      |      |      |      |      |      |
| 2951.409 | m/z | ± | 0,47 | 0,39 | 0,40 | 0,62 | 0,40 | 0,27 |
| 0.154 Da |     |   |      |      |      |      |      |      |
| 2952.409 | m/z | ± | 0,45 | 0,37 | 0,41 | 0,63 | 0,40 | 0,26 |

|          |     |   |      |      |      |      |      |      |
|----------|-----|---|------|------|------|------|------|------|
| 0.154 Da |     |   |      |      |      |      |      |      |
| 2953.409 | m/z | ± | 0,49 | 0,42 | 0,41 | 0,62 | 0,44 | 0,31 |
| 0.154 Da |     |   |      |      |      |      |      |      |
| 2959.41  | m/z | ± | 0,46 | 0,37 | 0,40 | 0,60 | 0,51 | 0,40 |
| 0.154 Da |     |   |      |      |      |      |      |      |
| 2960.41  | m/z | ± | 0,43 | 0,34 | 0,38 | 0,60 | 0,50 | 0,38 |
| 0.154 Da |     |   |      |      |      |      |      |      |
| 2961.41  | m/z | ± | 0,45 | 0,35 | 0,38 | 0,62 | 0,52 | 0,38 |
| 0.154 Da |     |   |      |      |      |      |      |      |
| 2962.41  | m/z | ± | 0,44 | 0,35 | 0,38 | 0,57 | 0,51 | 0,44 |
| 0.154 Da |     |   |      |      |      |      |      |      |
| 2963.41  | m/z | ± | 0,48 | 0,39 | 0,39 | 0,56 | 0,51 | 0,45 |
| 0.154 Da |     |   |      |      |      |      |      |      |
| 2980.412 | m/z | ± | 0,48 | 0,48 | 0,49 | 0,51 | 0,51 | 0,49 |
| 0.154 Da |     |   |      |      |      |      |      |      |
| 3084.421 | m/z | ± | 0,45 | 0,42 | 0,44 | 0,53 | 0,50 | 0,47 |
| 0.154 Da |     |   |      |      |      |      |      |      |
| 3085.421 | m/z | ± | 0,49 | 0,41 | 0,40 | 0,59 | 0,50 | 0,40 |
| 0.154 Da |     |   |      |      |      |      |      |      |
| 3086.421 | m/z | ± | 0,47 | 0,39 | 0,41 | 0,55 | 0,48 | 0,42 |
| 0.154 Da |     |   |      |      |      |      |      |      |
| 3087.421 | m/z | ± | 0,46 | 0,42 | 0,43 | 0,53 | 0,50 | 0,47 |
| 0.154 Da |     |   |      |      |      |      |      |      |
| 3100.423 | m/z | ± | 0,43 | 0,34 | 0,37 | 0,58 | 0,55 | 0,46 |
| 0.154 Da |     |   |      |      |      |      |      |      |
| 3101.423 | m/z | ± | 0,44 | 0,33 | 0,37 | 0,59 | 0,53 | 0,42 |

|          |       |      |      |      |      |      |      |
|----------|-------|------|------|------|------|------|------|
| 0.154 Da |       |      |      |      |      |      |      |
| 3102.423 | m/z ± | 0,43 | 0,33 | 0,35 | 0,61 | 0,55 | 0,42 |
| 0.154 Da |       |      |      |      |      |      |      |
| 3103.423 | m/z ± | 0,42 | 0,32 | 0,36 | 0,61 | 0,56 | 0,44 |
| 0.154 Da |       |      |      |      |      |      |      |
| 3104.423 | m/z ± | 0,46 | 0,35 | 0,37 | 0,56 | 0,53 | 0,46 |
| 0.154 Da |       |      |      |      |      |      |      |
| 3122.425 | m/z ± | 0,46 | 0,44 | 0,47 | 0,53 | 0,53 | 0,50 |
| 0.154 Da |       |      |      |      |      |      |      |
| 3123.425 | m/z ± | 0,47 | 0,41 | 0,44 | 0,55 | 0,52 | 0,48 |
| 0.154 Da |       |      |      |      |      |      |      |
| 3124.425 | m/z ± | 0,46 | 0,41 | 0,44 | 0,54 | 0,51 | 0,47 |
| 0.154 Da |       |      |      |      |      |      |      |
| 3139.426 | m/z ± | 0,46 | 0,43 | 0,44 | 0,56 | 0,52 | 0,45 |
| 0.154 Da |       |      |      |      |      |      |      |
| 3141.426 | m/z ± | 0,47 | 0,45 | 0,46 | 0,54 | 0,51 | 0,46 |
| 0.154 Da |       |      |      |      |      |      |      |
| 3168.429 | m/z ± | 0,52 | 0,51 | 0,50 | 0,52 | 0,52 | 0,50 |
| 0.154 Da |       |      |      |      |      |      |      |
| 3169.429 | m/z ± | 0,50 | 0,49 | 0,50 | 0,51 | 0,50 | 0,49 |
| 0.154 Da |       |      |      |      |      |      |      |
| 3171.429 | m/z ± | 0,50 | 0,47 | 0,49 | 0,52 | 0,49 | 0,47 |
| 0.154 Da |       |      |      |      |      |      |      |
| 3175.43  | m/z ± | 0,54 | 0,51 | 0,48 | 0,52 | 0,50 | 0,47 |
| 0.154 Da |       |      |      |      |      |      |      |
| 3178.43  | m/z ± | 0,52 | 0,51 | 0,50 | 0,52 | 0,50 | 0,48 |

|                     |      |      |      |      |      |
|---------------------|------|------|------|------|------|
| 0.154 Da            |      |      |      |      |      |
| 3179.23 m/z ± 0,48  | 0,50 | 0,51 | 0,51 | 0,51 | 0,51 |
| 0.154 Da            |      |      |      |      |      |
| 3180.43 m/z ± 0,49  | 0,50 | 0,50 | 0,52 | 0,49 | 0,48 |
| 0.154 Da            |      |      |      |      |      |
| 3181.43 m/z ± 0,53  | 0,52 | 0,49 | 0,52 | 0,49 | 0,46 |
| 0.154 Da            |      |      |      |      |      |
| 3182.43 m/z ± 0,49  | 0,49 | 0,51 | 0,51 | 0,50 | 0,49 |
| 0.154 Da            |      |      |      |      |      |
| 3183.43 m/z ± 0,49  | 0,48 | 0,49 | 0,52 | 0,52 | 0,50 |
| 0.154 Da            |      |      |      |      |      |
| 3184.43 m/z ± 0,50  | 0,49 | 0,47 | 0,52 | 0,52 | 0,49 |
| 0.154 Da            |      |      |      |      |      |
| 3185.43 m/z ± 0,51  | 0,48 | 0,44 | 0,53 | 0,51 | 0,48 |
| 0.154 Da            |      |      |      |      |      |
| 3186.431 m/z ± 0,51 | 0,48 | 0,45 | 0,54 | 0,52 | 0,48 |
| 0.154 Da            |      |      |      |      |      |
| 3187.431 m/z ± 0,51 | 0,48 | 0,47 | 0,53 | 0,51 | 0,48 |
| 0.154 Da            |      |      |      |      |      |
| 3188.431 m/z ± 0,51 | 0,49 | 0,50 | 0,53 | 0,51 | 0,48 |
| 0.154 Da            |      |      |      |      |      |
| 3189.631 m/z ± 0,52 | 0,52 | 0,49 | 0,51 | 0,50 | 0,49 |
| 0.154 Da            |      |      |      |      |      |
| 3190.431 m/z ± 0,49 | 0,50 | 0,48 | 0,50 | 0,50 | 0,50 |
| 0.154 Da            |      |      |      |      |      |
| 3191.431 m/z ± 0,52 | 0,51 | 0,48 | 0,51 | 0,50 | 0,49 |

|          |       |      |      |      |      |      |      |
|----------|-------|------|------|------|------|------|------|
| 0.154 Da |       |      |      |      |      |      |      |
| 3192.631 | m/z ± | 0,49 | 0,50 | 0,52 | 0,50 | 0,52 | 0,51 |
| 0.154 Da |       |      |      |      |      |      |      |
| 3193.231 | m/z ± | 0,47 | 0,50 | 0,52 | 0,50 | 0,52 | 0,52 |
| 0.154 Da |       |      |      |      |      |      |      |
| 3193.831 | m/z ± | 0,49 | 0,51 | 0,53 | 0,50 | 0,52 | 0,52 |
| 0.154 Da |       |      |      |      |      |      |      |
| 3194.431 | m/z ± | 0,51 | 0,51 | 0,49 | 0,51 | 0,49 | 0,48 |
| 0.154 Da |       |      |      |      |      |      |      |
| 3195.431 | m/z ± | 0,51 | 0,50 | 0,51 | 0,51 | 0,49 | 0,48 |
| 0.154 Da |       |      |      |      |      |      |      |
| 3196.431 | m/z ± | 0,50 | 0,49 | 0,48 | 0,53 | 0,50 | 0,48 |
| 0.154 Da |       |      |      |      |      |      |      |
| 3197.432 | m/z ± | 0,49 | 0,51 | 0,49 | 0,52 | 0,50 | 0,47 |
| 0.154 Da |       |      |      |      |      |      |      |
| 3198.432 | m/z ± | 0,50 | 0,50 | 0,50 | 0,53 | 0,50 | 0,48 |
| 0.154 Da |       |      |      |      |      |      |      |
| 3199.432 | m/z ± | 0,51 | 0,51 | 0,49 | 0,52 | 0,51 | 0,49 |
| 0.154 Da |       |      |      |      |      |      |      |

**Supplementary Table S2.** Peptides identified by nanoLC-MS/MS

| Retention<br>time (min) | Charge | m/z     | Measured<br>mass | Mass<br>error<br>(u) | Mass<br>error<br>(ppm) | Score | Sequence              | Modifications        | Accession   | Description                              |
|-------------------------|--------|---------|------------------|----------------------|------------------------|-------|-----------------------|----------------------|-------------|------------------------------------------|
| 31,314                  | 2      | 480,758 | 959,502          | -0,001               | -1,397                 | 49,3  | VTDALNATR             |                      | CH60_HUMAN  | 60 kDa heat shock protein, mitochondrial |
| 53,593                  | 2      | 900,991 | 1799,967         | 0,000                | -0,086                 | 27,26 | LAPDYDALDVA<br>NKIGII |                      | RL23A_HUMAN | 60S ribosomal protein L23a               |
| 51,270                  | 3      | 602,669 | 1804,987         | -0,001               | -0,566                 | 29,3  | SVFALTNGIYPH<br>KLVF  |                      | RL6_HUMAN   | 60S ribosomal protein L6                 |
| 32,339                  | 2      | 614,816 | 1227,618         | -0,003               | -2,326                 | 26,78 | VEIANDQGNR            |                      | GRP78_HUMAN | 78 kDa glucose-regulated protein         |
| 41,586                  | 2      | 658,821 | 1315,628         | -0,001               | -0,852                 | 52,08 | NELESYAYSLK           |                      | GRP78_HUMAN | 78 kDa glucose-regulated protein         |
| 43,412                  | 2      | 764,876 | 1527,737         | -0,002               | -1,503                 | 37,32 | AKFEELNMDLFR          | [8] Oxidation<br>(M) | GRP78_HUMAN | 78 kDa glucose-regulated protein         |
| 31,246                  | 2      | 488,727 | 975,440          | -0,001               | -1,518                 | 88,56 | AGFAGDDAPR            |                      | ACTA_HUMAN  | Actin, aortic smooth muscle              |
| 37,841                  | 2      | 565,776 | 1129,538         | -0,002               | -2,062                 | 39,53 | GYSFVTTAER            |                      | ACTA_HUMAN  | Actin, aortic smooth muscle              |
| 38,604                  | 2      | 581,312 | 1160,610         | -0,001               | -0,887                 | 27,67 | EITALAPSTMK           |                      | ACTA_HUMAN  | Actin, aortic smooth muscle              |
| 31,651                  | 2      | 586,288 | 1170,561         | -0,002               | -2,135                 | 59,23 | HQGVVMGMGQ<br>K       |                      | ACTA_HUMAN  | Actin, aortic smooth muscle              |



|        |   |         |          |        |        |        |                        |                                    |           |            |                             |
|--------|---|---------|----------|--------|--------|--------|------------------------|------------------------------------|-----------|------------|-----------------------------|
| 35,588 | 2 | 589,309 | 1176,604 | -0,002 | -1,464 | 49,97  | EITALAPSTMK            | [10]<br>(M)                        | Oxidation | ACTA_HUMAN | Actin, aortic smooth muscle |
| 30,739 | 2 | 594,285 | 1186,555 | -0,003 | -2,802 | 32,36  | HQGVMVGMGQ<br>K        | [8]<br>(M)                         | Oxidation | ACTA_HUMAN | Actin, aortic smooth muscle |
| 31,010 | 2 | 594,285 | 1186,556 | -0,003 | -2,392 | 59,62  | HQGVMVGMGQ<br>K        | [5]<br>(M)                         | Oxidation | ACTA_HUMAN | Actin, aortic smooth muscle |
| 30,567 | 2 | 599,763 | 1197,512 | -0,003 | -2,414 | 57,19  | DSYVGDEAQSK            |                                    |           | ACTA_HUMAN | Actin, aortic smooth muscle |
| 40,077 | 2 | 599,855 | 1197,696 | -0,002 | -2,086 | 41,77  | AVFPSIVGRPR            |                                    |           | ACTA_HUMAN | Actin, aortic smooth muscle |
| 40,077 | 3 | 400,241 | 1197,701 | 0,003  | 2,297  | 33,51  | AVFPSIVGRPR            |                                    |           | ACTA_HUMAN | Actin, aortic smooth muscle |
| 30,363 | 2 | 602,283 | 1202,551 | -0,003 | -2,472 | 41,92  | HQGVMVGMGQ<br>K        | [5]<br>(M)   [8]<br>Oxidation (M)  | Oxidation | ACTA_HUMAN | Actin, aortic smooth muscle |
| 30,567 | 2 | 677,814 | 1353,613 | -0,003 | -2,204 | 48,47  | DSYVGDEAQSKR           |                                    |           | ACTA_HUMAN | Actin, aortic smooth muscle |
| 33,468 | 2 | 790,904 | 1579,793 | -0,002 | -1,133 | 43,04  | MQKEITALAPST<br>MK     | [1]<br>(M)   [13]<br>Oxidation (M) | Oxidation | ACTA_HUMAN | Actin, aortic smooth muscle |
| 45,436 | 2 | 895,949 | 1789,884 | -0,001 | -0,339 | 122,91 | SYELPDGQVITIG<br>NER   |                                    |           | ACTA_HUMAN | Actin, aortic smooth muscle |
| 44,400 | 2 | 895,949 | 1789,884 | -0,001 | -0,313 | 28,06  | SYELPDGQVITIG<br>NER   |                                    |           | ACTA_HUMAN | Actin, aortic smooth muscle |
| 41,285 | 2 | 978,525 | 1955,036 | -0,001 | -0,289 | 77,54  | VAPEEHPTLLTE<br>APLNPK |                                    |           | ACTA_HUMAN | Actin, aortic smooth muscle |

|        |   |              |          |        |        |        |                             |             |                         |                                               |
|--------|---|--------------|----------|--------|--------|--------|-----------------------------|-------------|-------------------------|-----------------------------------------------|
| 41,285 | 3 | 652,687      | 1955,039 | 0,002  | 1,149  | 46,13  | VAPEEHPTLLTE<br>APLNPK      |             | ACTA_HUMAN              | Actin, aortic smooth<br>muscle                |
| 43,392 | 3 | 719,382      | 2155,125 | -0,004 | -1,644 | 30,05  | AGFAGDDAPRA<br>VFPSIVGRPR   |             | ACTA_HUMAN              | Actin, aortic smooth<br>muscle                |
| 46,922 | 2 | 1114,53<br>6 | 2227,058 | 0,000  | 0,202  | 86,08  | DLYANNVLSGG<br>TTMYPGIADR   |             | ACTA_HUMAN              | Actin, aortic smooth<br>muscle                |
| 44,744 | 2 | 1122,53<br>4 | 2243,053 | 0,000  | -0,024 | 109,78 | DLYANNVLSGG<br>TTMYPGIADR   | [14]<br>(M) | Oxidation<br>ACTA_HUMAN | Actin, aortic smooth<br>muscle                |
| 34,926 | 3 | 784,363      | 2350,067 | -0,001 | -0,637 | 40,56  | HQGVVMVGMGQ<br>KDSYVGDEAQSK |             | ACTA_HUMAN              | Actin, aortic smooth<br>muscle                |
| 41,782 | 3 | 791,390      | 2371,147 | -0,001 | -0,420 | 35,62  | KDLYANNVLSG<br>GTTMYPGIADR  | [15]<br>(M) | Oxidation<br>ACTA_HUMAN | Actin, aortic smooth<br>muscle                |
| 29,220 | 2 | 468,796      | 935,577  | -0,003 | -3,239 | 32,28  | KPPGSLLPK                   |             | ACD11_HUMAN             | Acyl-CoA<br>dehydrogenase family<br>member 11 |
| 29,204 | 3 | 312,867      | 935,579  | -0,001 | -1,444 | 37,77  | KPPGSLLPK                   |             | ACD11_HUMAN             | Acyl-CoA<br>dehydrogenase family<br>member 11 |
| 43,392 | 2 | 519,273      | 1036,532 | -0,002 | -2,070 | 30,7   | GFLIDGYPR                   |             | KAD5_HUMAN              | Adenylate kinase<br>isoenzyme 5               |
| 31,864 | 2 | 671,892      | 1341,770 | -0,003 | -1,962 | 32,68  | VIQVAAGSSNLK<br>R           |             | ALDH2_HUMAN             | Aldehyde<br>dehydrogenase,<br>mitochondrial   |
| 29,612 | 2 | 450,747      | 899,480  | -0,003 | -2,961 | 45,24  | KQVSGPER                    |             | CRYAB_HUMAN             | Alpha-crystallin B<br>chain                   |
| 42,114 | 2 | 461,256      | 920,498  | 0,001  | 1,358  | 28,35  | FSVNLDVK                    |             | CRYAB_HUMAN             | Alpha-crystallin B                            |

|        |   |              |          |        |        |       |                                      |            |                          |                                                                        |   |
|--------|---|--------------|----------|--------|--------|-------|--------------------------------------|------------|--------------------------|------------------------------------------------------------------------|---|
| 53,880 | 3 | 875,464      | 2623,369 | -0,001 | -0,393 | 39,47 | IPADVDPLTITSS<br>LSSDGVLTVNGP<br>R   |            | CRYAB_HUMAN              | chain<br>Alpha-crystallin<br>chain                                     | B |
| 53,880 | 2 | 1312,69<br>2 | 2623,370 | -0,001 | -0,284 | 34,27 | IPADVDPLTITSS<br>LSSDGVLTVNGP<br>R   |            | CRYAB_HUMAN              | Alpha-crystallin<br>chain                                              | B |
| 52,480 | 3 | 981,852      | 2942,534 | -0,001 | -0,355 | 33,25 | YRIPADVDPLTIT<br>SSLSSDGVLTVN<br>GPR |            | CRYAB_HUMAN              | Alpha-crystallin<br>chain                                              | B |
| 52,872 | 3 | 981,852      | 2942,534 | -0,001 | -0,307 | 62,15 | YRIPADVDPLTIT<br>SSLSSDGVLTVN<br>GPR |            | CRYAB_HUMAN              | Alpha-crystallin<br>chain                                              | B |
| 48,054 | 2 | 902,975      | 1803,936 | -0,001 | -0,371 | 39,53 | AAVPSGASTGIY<br>EAELELR              |            | ENOA_HUMAN               | Alpha-enolase                                                          |   |
| 44,894 | 2 | 580,322      | 1158,630 | 0,013  | 10,811 | 35,49 | MQKPQGSLVR                           | [1]<br>(M) | Oxidation<br>SIA7F_HUMAN | Alpha-N-<br>acetylgalactosaminide<br>alpha-2,6-<br>sialyltransferase 6 |   |
| 38,874 | 2 | 438,769      | 875,523  | 0,000  | -0,435 | 26,1  | ALQLYLR                              |            | AL2CL_HUMAN              | ALS2 C-terminal-like<br>protein                                        |   |
| 39,830 | 2 | 501,302      | 1000,590 | -0,002 | -1,897 | 37,76 | VLTEIIASR                            |            | ANXA5_HUMAN              | Annexin A5                                                             |   |
| 56,982 | 2 | 852,954      | 1703,893 | -0,001 | -0,426 | 75,24 | GLGTDEESILTLL<br>TSR                 |            | ANXA5_HUMAN              | Annexin A5                                                             |   |
| 59,363 | 3 | 630,682      | 1889,024 | 0,009  | 4,934  | 26,91 | KVTEGVVDVIVY<br>PSAADK               |            | A1CF_HUMAN               | APOBEC1<br>complementation                                             |   |

|        |   |         |          |        |        |       |                         |            | factor                                                                         |
|--------|---|---------|----------|--------|--------|-------|-------------------------|------------|--------------------------------------------------------------------------------|
| 35,449 | 2 | 484,779 | 967,543  | -0,002 | -2,190 | 37,46 | LGPLVEQGR               | APOE_HUMAN | Apolipoprotein E                                                               |
| 42,971 | 2 | 830,930 | 1659,846 | -0,001 | -0,690 | 52,41 | NLDYVATSIHEA<br>VTK     | AATC_HUMAN | Aspartate<br>aminotransferase,<br>cytoplasmic                                  |
| 35,868 | 2 | 362,230 | 722,445  | 0,001  | 1,083  | 25,04 | APGIIPR                 | ATPA_HUMAN | ATP synthase subunit<br>alpha, mitochondrial                                   |
| 40,077 | 2 | 500,791 | 999,568  | -0,003 | -3,246 | 47,93 | VLSIGDGIAR              | ATPA_HUMAN | ATP synthase subunit<br>alpha, mitochondrial                                   |
| 39,653 | 2 | 560,863 | 1119,711 | -0,001 | -1,293 | 42,95 | VGLKAPGIIPR             | ATPA_HUMAN | ATP synthase subunit<br>alpha, mitochondrial                                   |
| 39,653 | 3 | 374,245 | 1119,713 | 0,000  | 0,141  | 51,21 | VGLKAPGIIPR             | ATPA_HUMAN | ATP synthase subunit<br>alpha, mitochondrial                                   |
| 34,419 | 2 | 615,345 | 1228,675 | -0,002 | -1,873 | 27    | ELIIGDRQTGK             | ATPA_HUMAN | ATP synthase subunit<br>alpha, mitochondrial                                   |
| 36,828 | 2 | 679,876 | 1357,737 | -0,001 | -1,017 | 34,89 | ISVREPMQTGIK            | ATPA_HUMAN | ATP synthase subunit<br>alpha, mitochondrial                                   |
| 45,763 | 3 | 640,369 | 1918,087 | -0,002 | -1,117 | 45,07 | VLDSGAPIKIPVG<br>PETLGR | ATPB_HUMAN | ATP synthase subunit<br>beta, mitochondrial                                    |
| 40,005 | 2 | 507,789 | 1013,563 | -0,002 | -2,331 | 25,75 | LGTVPQFPR               | PGBM_HUMAN | Basement membrane-<br>specific heparan<br>sulfate proteoglycan<br>core protein |
| 36,767 | 2 | 507,818 | 1013,621 | -0,002 | -1,810 | 25,78 | GTLIIRDVK               | PGBM_HUMAN | Basement membrane-<br>specific heparan<br>sulfate proteoglycan                 |

|        |   |         |          |        |        |       |                            |                  |           |             |                                                                         |
|--------|---|---------|----------|--------|--------|-------|----------------------------|------------------|-----------|-------------|-------------------------------------------------------------------------|
| 42,771 | 2 | 563,826 | 1125,638 | -0,002 | -1,536 | 32,56 | LEGDTLIIPR                 |                  |           | PGBM_HUMAN  | core protein<br>Basement membrane-specific heparan sulfate proteoglycan |
| 35,379 | 3 | 563,327 | 1686,960 | -0,004 | -2,419 | 47,44 | VGGHLRPGIVQS<br>GGVVR      |                  |           | PGBM_HUMAN  | core protein<br>Basement membrane-specific heparan sulfate proteoglycan |
| 57,828 | 3 | 599,009 | 1794,005 | -0,003 | -1,501 | 39,06 | EHLLMALAGIDT<br>LLIR       | [5]<br>(M)       | Oxidation | PGBM_HUMAN  | core protein<br>Basement membrane-specific heparan sulfate proteoglycan |
| 47,467 | 4 | 613,818 | 2451,243 | -0,002 | -0,932 | 34,23 | HLISTHFAPGDF<br>QGFALVNPQR |                  |           | PGBM_HUMAN  | core protein<br>Basement membrane-specific heparan sulfate proteoglycan |
| 34,575 | 2 | 507,753 | 1013,491 | -0,003 | -2,509 | 28,22 | FFVSSSQGR                  |                  |           | BASI_HUMAN  | Basigin                                                                 |
| 31,651 | 2 | 586,288 | 1170,561 | -0,002 | -2,135 | 59,23 | HQGVMVGMGQ<br>K            |                  |           | ACTBL_HUMAN | Beta-actin-like protein<br>2                                            |
| 30,739 | 2 | 594,285 | 1186,555 | -0,003 | -2,802 | 32,36 | HQGVMVGMGQ<br>K            | [8]<br>(M)       | Oxidation | ACTBL_HUMAN | Beta-actin-like protein<br>2                                            |
| 31,010 | 2 | 594,285 | 1186,556 | -0,003 | -2,392 | 59,62 | HQGVMVGMGQ<br>K            | [5]<br>(M)       | Oxidation | ACTBL_HUMAN | Beta-actin-like protein<br>2                                            |
| 30,363 | 2 | 602,283 | 1202,551 | -0,003 | -2,472 | 41,92 | HQGVMVGMGQ<br>K            | [5]<br>(M)   [8] | Oxidation | ACTBL_HUMAN | Beta-actin-like protein<br>2                                            |

|        |   |         |          |        |        |        | Oxidation (M)              |             |                                                                            |
|--------|---|---------|----------|--------|--------|--------|----------------------------|-------------|----------------------------------------------------------------------------|
| 45,436 | 2 | 895,949 | 1789,884 | -0,001 | -0,339 | 122,91 | SYELPDGQVITIG<br>NER       | ACTBL_HUMAN | Beta-actin-like protein<br>2                                               |
| 44,400 | 2 | 895,949 | 1789,884 | -0,001 | -0,313 | 28,06  | SYELPDGQVITIG<br>NER       | ACTBL_HUMAN | Beta-actin-like protein<br>2                                               |
| 36,733 | 2 | 690,859 | 1379,703 | -0,001 | -1,072 | 28,41  | GNPTVEVDLHT<br>AK          | ENOB_HUMAN  | Beta-enolase                                                               |
| 48,054 | 2 | 902,975 | 1803,936 | -0,001 | -0,371 | 39,53  | AAVPSGASTGIY<br>EALELR     | ENOB_HUMAN  | Beta-enolase                                                               |
| 32,875 | 2 | 504,290 | 1006,565 | -0,002 | -2,445 | 42,57  | LGLGHNQIR                  | PGS1_HUMAN  | Biglycan                                                                   |
| 32,875 | 3 | 336,530 | 1006,567 | 0,000  | 0,057  | 26,28  | LGLGHNQIR                  | PGS1_HUMAN  | Biglycan                                                                   |
| 49,382 | 3 | 676,380 | 2026,119 | -0,002 | -0,968 | 31,14  | NHLVEIPPNLPS<br>LVELR      | PGS1_HUMAN  | Biglycan                                                                   |
| 47,100 | 2 | 782,956 | 1563,898 | 0,000  | -0,220 | 31,49  | SIVVSPILIPENQR             | CAD13_HUMAN | Cadherin-13                                                                |
| 44,869 | 2 | 918,925 | 1835,835 | -0,001 | -0,411 | 32,84  | MTAFDADDPAT<br>DNALLR      | CAD13_HUMAN | Cadherin-13                                                                |
| 40,928 | 2 | 508,790 | 1015,565 | -0,001 | -0,928 | 36,19  | ISDILNSVR                  | KCC2B_HUMAN | Calcium/calmodulin-<br>dependent protein<br>kinase type II subunit<br>beta |
| 35,059 | 2 | 438,732 | 875,449  | -0,001 | -1,112 | 59,95  | LPASFDAR                   | CATB_HUMAN  | Cathepsin B                                                                |
| 46,619 | 2 | 491,320 | 980,626  | -0,001 | -1,096 | 32,21  | LLLPTPTVK                  | CCAR1_HUMAN | Cell division cycle and<br>apoptosis regulator<br>protein 1                |
| 35,117 | 4 | 573,792 | 2291,138 | 0,015  | 6,422  | 30,26  | CRAEDTLFQAPP<br>ALANGAHPGR | CJ090_HUMAN | Centrosomal protein<br>C10orf90                                            |

|        |   |         |          |        |        |       |                      |         |           |             |                                                                                |
|--------|---|---------|----------|--------|--------|-------|----------------------|---------|-----------|-------------|--------------------------------------------------------------------------------|
| 39,404 | 2 | 623,355 | 1244,695 | -0,002 | -1,760 | 26,89 | KTLLSNLEEAK          |         |           | CLUS_HUMAN  | Clusterin                                                                      |
| 33,126 | 2 | 473,253 | 944,491  | -0,001 | -1,277 | 30,15 | LSENVDR              |         |           | CHCH3_HUMAN | Coiled-coil-helix-coiled-coil-helix domain-containing protein 3, mitochondrial |
| 30,008 | 2 | 418,722 | 835,429  | -0,001 | -1,505 | 49,08 | GPAGPQGPR            |         |           | CO1A1_HUMAN | Collagen alpha-1(I) chain                                                      |
| 34,480 | 2 | 426,216 | 850,418  | -0,001 | -0,963 | 43,88 | GFSGLDGAK            |         |           | CO1A1_HUMAN | Collagen alpha-1(I) chain                                                      |
| 29,729 | 2 | 434,716 | 867,418  | -0,002 | -2,089 | 34,63 | GEAGPQGPR            |         |           | CO1A1_HUMAN | Collagen alpha-1(I) chain                                                      |
| 30,105 | 2 | 443,722 | 885,429  | -0,002 | -1,925 | 47,39 | GSEGPQGV             |         |           | CO1A1_HUMAN | Collagen alpha-1(I) chain                                                      |
| 38,272 | 2 | 581,289 | 1160,563 | -0,001 | -1,222 | 34,7  | GQAGVMGFPGP K        | [6] (M) | Oxidation | CO1A1_HUMAN | Collagen alpha-1(I) chain                                                      |
| 40,959 | 2 | 479,289 | 956,564  | -0,001 | -1,429 | 51,43 | IALVITDGR            |         |           | CO6A1_HUMAN | Collagen alpha-1(VI) chain                                                     |
| 46,133 | 2 | 966,507 | 1930,999 | -0,001 | -0,402 | 52,12 | LLLFSDGNSQGA TPAAIEK |         |           | CO6A1_HUMAN | Collagen alpha-1(VI) chain                                                     |
| 29,760 | 2 | 393,198 | 784,382  | -0,001 | -1,519 | 48,12 | GDQGPVGR             |         |           | CO1A2_HUMAN | Collagen alpha-2(I) chain                                                      |
| 29,812 | 2 | 448,234 | 894,454  | -0,002 | -2,484 | 39,01 | GPAGPSGPAGK          |         |           | CO1A2_HUMAN | Collagen alpha-2(I) chain                                                      |
| 29,988 | 2 | 612,308 | 1222,602 | -0,003 | -2,602 | 65,83 | GPAGPSGPAGK DGR      |         |           | CO1A2_HUMAN | Collagen alpha-2(I) chain                                                      |

|        |   |         |          |        |        |       |                            |            |           |             |                   |             |
|--------|---|---------|----------|--------|--------|-------|----------------------------|------------|-----------|-------------|-------------------|-------------|
| 32,996 | 2 | 781,899 | 1561,783 | -0,002 | -0,980 | 87,57 | GETGPSGPGVGA<br>GAVGPR     |            |           | CO1A2_HUMAN | Collagen<br>chain | alpha-2(I)  |
| 31,314 | 3 | 676,342 | 2026,004 | -0,005 | -2,623 | 39,23 | HGNRGETGPSGP<br>VGPAGAVGPR |            |           | CO1A2_HUMAN | Collagen<br>chain | alpha-2(I)  |
| 39,888 | 2 | 607,848 | 1213,681 | -0,001 | -1,030 | 44,56 | LFAVAPNQNLK                |            |           | CO6A2_HUMAN | Collagen<br>chain | alpha-2(VI) |
| 36,330 | 2 | 651,327 | 1300,639 | -0,002 | -1,345 | 34,24 | DIASTPHELYR                |            |           | CO6A2_HUMAN | Collagen<br>chain | alpha-2(VI) |
| 30,773 | 2 | 359,216 | 716,417  | -0,001 | -1,092 | 33,63 | VTQLTR                     |            |           | CO6A3_HUMAN | Collagen<br>chain | alpha-3(VI) |
| 34,891 | 2 | 367,221 | 732,428  | 0,000  | -0,203 | 34,33 | FAQVIR                     |            |           | CO6A3_HUMAN | Collagen<br>chain | alpha-3(VI) |
| 38,359 | 2 | 403,232 | 804,450  | 0,000  | 0,126  | 36,43 | ALEFVAR                    |            |           | CO6A3_HUMAN | Collagen<br>chain | alpha-3(VI) |
| 32,443 | 2 | 412,242 | 822,470  | -0,001 | -1,206 | 51,16 | VGLEHLR                    |            |           | CO6A3_HUMAN | Collagen<br>chain | alpha-3(VI) |
| 37,001 | 3 | 340,176 | 1017,506 | -0,001 | -0,931 | 28,87 | LMHLEFGR                   | [2]<br>(M) | Oxidation | CO6A3_HUMAN | Collagen<br>chain | alpha-3(VI) |
| 39,854 | 2 | 573,808 | 1145,601 | -0,003 | -2,381 | 40,62 | SSGIVSLGVGDR               |            |           | CO6A3_HUMAN | Collagen<br>chain | alpha-3(VI) |
| 41,083 | 2 | 619,829 | 1237,644 | -0,001 | -1,184 | 47,18 | VAVFFSNTPTR                |            |           | CO6A3_HUMAN | Collagen<br>chain | alpha-3(VI) |
| 46,480 | 3 | 487,292 | 1458,853 | -0,002 | -1,606 | 25,39 | IGDLHPQIVNLL<br>K          |            |           | CO6A3_HUMAN | Collagen<br>chain | alpha-3(VI) |
| 45,376 | 2 | 731,885 | 1461,756 | -0,002 | -1,234 | 27,26 | QINVGNLEYVS<br>R           |            |           | CO6A3_HUMAN | Collagen<br>chain | alpha-3(VI) |



|        |   |         |          |        |        |       |                       |            |           |             |                                                      |
|--------|---|---------|----------|--------|--------|-------|-----------------------|------------|-----------|-------------|------------------------------------------------------|
| 56,800 | 2 | 809,479 | 1616,943 | -0,001 | -0,422 | 43,41 | AAPLQGMLPGL<br>LAPLR  |            |           | CO6A3_HUMAN | Collagen alpha-3(VI)<br>chain                        |
| 51,197 | 2 | 817,476 | 1632,938 | -0,001 | -0,483 | 27,98 | AAPLQGMLPGL<br>LAPLR  | [7]<br>(M) | Oxidation | CO6A3_HUMAN | Collagen alpha-3(VI)<br>chain                        |
| 44,625 | 2 | 489,796 | 977,578  | -0,002 | -1,634 | 29,85 | VTLELYK               |            |           | KCRM_HUMAN  | Creatine kinase M-<br>type                           |
| 40,987 | 2 | 553,844 | 1105,673 | -0,002 | -1,462 | 32,75 | VTLELYKK              |            |           | KCRM_HUMAN  | Creatine kinase M-<br>type                           |
| 40,959 | 3 | 369,566 | 1105,675 | 0,000  | 0,370  | 27,56 | VTLELYKK              |            |           | KCRM_HUMAN  | Creatine kinase M-<br>type                           |
| 39,277 | 2 | 651,821 | 1301,627 | -0,001 | -0,785 | 33,03 | GQSIDDMIPAQK          |            |           | KCRM_HUMAN  | Creatine kinase M-<br>type                           |
| 32,373 | 2 | 659,818 | 1317,621 | -0,003 | -2,039 | 34,89 | GQSIDDMIPAQK          | [7]<br>(M) | Oxidation | KCRM_HUMAN  | Creatine kinase M-<br>type                           |
| 41,410 | 2 | 754,353 | 1506,692 | -0,003 | -1,775 | 58,36 | GGDDLDPNYVL<br>SSR    |            |           | KCRM_HUMAN  | Creatine kinase M-<br>type                           |
| 49,168 | 2 | 754,404 | 1506,792 | -0,001 | -0,341 | 83,26 | LSVEALNSLTGEF<br>K    |            |           | KCRM_HUMAN  | Creatine kinase M-<br>type                           |
| 31,077 | 2 | 684,360 | 1366,706 | -0,003 | -2,367 | 51,17 | SVTTSNPSKFTAK         |            |           | CSRP3_HUMAN | Cysteine and glycine-<br>rich protein 3              |
| 49,131 | 3 | 644,713 | 1931,118 | -0,002 | -1,201 | 50,24 | LLDVDNRVVLPI<br>EAPIR |            |           | COX2_HUMAN  | Cytochrome c oxidase<br>subunit 2                    |
| 34,018 | 2 | 453,263 | 904,512  | -0,001 | -1,528 | 28,35 | LVPQQLAH              |            |           | COX5B_HUMAN | Cytochrome c oxidase<br>subunit 5B,<br>mitochondrial |
| 43,885 | 2 | 593,826 | 1185,638 | -0,002 | -1,355 | 38,43 | GLDPYNVLAPK           |            |           | COX5B_HUMAN | Cytochrome c oxidase                                 |

|        |   |              |          |        |        |       |                           |             |                                       |
|--------|---|--------------|----------|--------|--------|-------|---------------------------|-------------|---------------------------------------|
|        |   |              |          |        |        |       |                           |             | subunit 5B,<br>mitochondrial          |
| 38,383 | 2 | 425,245      | 848,476  | 0,000  | 0,039  | 48,74 | AGIFQSVK                  | COX6C_HUMAN | Cytochrome c oxidase<br>subunit 6C    |
| 35,208 | 2 | 489,292      | 976,569  | -0,002 | -2,099 | 35,74 | KAGIFQSVK                 | COX6C_HUMAN | Cytochrome c oxidase<br>subunit 6C    |
| 45,065 | 2 | 617,829      | 1233,643 | -0,002 | -1,486 | 37,58 | QTESLESLLSK               | CKAP4_HUMAN | Cytoskeleton-<br>associated protein 4 |
| 33,781 | 3 | 451,580      | 1351,719 | -0,002 | -1,252 | 25,67 | ELHLDNNKLTR               | PGS2_HUMAN  | Decorin                               |
| 30,705 | 2 | 376,208      | 750,401  | -0,001 | -1,235 | 27,85 | VYQVSR                    | DESM_HUMAN  | Desmin                                |
| 28,299 | 2 | 434,211      | 866,407  | -0,003 | -2,926 | 63,65 | GSSSSVTSR                 | DESM_HUMAN  | Desmin                                |
| 32,875 | 2 | 501,763      | 1001,512 | -0,003 | -2,549 | 66,3  | ADVDAATLAR                | DESM_HUMAN  | Desmin                                |
| 35,718 | 2 | 516,774      | 1031,534 | -0,002 | -2,254 | 88,47 | TSGGAGGLGSLR              | DESM_HUMAN  | Desmin                                |
| 49,886 | 2 | 825,453      | 1648,892 | -0,001 | -0,831 | 65,92 | INLPIQTYSALNF<br>R        | DESM_HUMAN  | Desmin                                |
| 31,965 | 3 | 577,298      | 1728,872 | -0,003 | -1,953 | 28,64 | VSDLTQAANKN<br>NDALR      | DESM_HUMAN  | Desmin                                |
| 31,965 | 2 | 865,444      | 1728,873 | -0,003 | -1,556 | 31,28 | VSDLTQAANKN<br>NDALR      | DESM_HUMAN  | Desmin                                |
| 39,117 | 2 | 884,921      | 1767,828 | 0,000  | 0,045  | 32,75 | DGEVVSEATQQ<br>QHEVL      | DESM_HUMAN  | Desmin                                |
| 53,687 | 2 | 1044,54<br>9 | 2087,084 | 0,000  | -0,189 | 96,03 | TFGGAPGFPLGS<br>PLSSPVFPR | DESM_HUMAN  | Desmin                                |
| 53,708 | 3 | 696,702      | 2087,084 | 0,000  | 0,102  | 51,57 | TFGGAPGFPLGS<br>PLSSPVFPR | DESM_HUMAN  | Desmin                                |
| 50,251 | 3 | 748,735      | 2243,184 | -0,001 | -0,540 | 71,54 | RTFGGAPGFPLG              | DESM_HUMAN  | Desmin                                |

|            |   |         |          |        |        |       |                              |                       |             |                                                   |
|------------|---|---------|----------|--------|--------|-------|------------------------------|-----------------------|-------------|---------------------------------------------------|
| SPLSSPVFPR |   |         |          |        |        |       |                              |                       |             |                                                   |
| 45,166     | 2 | 769,943 | 1537,871 | 0,000  | -0,077 | 27,3  | LLEAQIATGGIID<br>PK          |                       | DESP_HUMAN  | Desmoplakin                                       |
| 33,642     | 2 | 409,208 | 816,401  | 0,004  | 4,307  | 26,25 | DQQIGEK                      |                       | MCM2_HUMAN  | DNA replication<br>licensing factor MCM2          |
| 37,463     | 2 | 427,265 | 852,516  | -0,002 | -2,356 | 55,31 | LGPLQVAR                     |                       | ETFB_HUMAN  | Electron transfer<br>flavoprotein subunit<br>beta |
| 39,912     | 2 | 670,364 | 1338,713 | -0,001 | -0,745 | 51,07 | LSVISVEDPPQR                 |                       | ETFB_HUMAN  | Electron transfer<br>flavoprotein subunit<br>beta |
| 38,468     | 2 | 513,308 | 1024,601 | -0,002 | -1,595 | 53,41 | IGGIGTVPVGR                  |                       | EF1A1_HUMAN | Elongation factor 1-<br>alpha 1                   |
| 38,468     | 2 | 513,308 | 1024,601 | -0,002 | -1,595 | 53,41 | IGGIGTVPVGR                  |                       | EF1A2_HUMAN | Elongation factor 1-<br>alpha 2                   |
| 51,385     | 3 | 857,812 | 2570,414 | -0,001 | -0,269 | 28,39 | VETGILRPGMVV<br>TFAPVNITTEVK |                       | EF1A2_HUMAN | Elongation factor 1-<br>alpha 2                   |
| 49,194     | 3 | 863,143 | 2586,408 | -0,001 | -0,257 | 36,97 | VETGILRPGMVV<br>TFAPVNITTEVK | [10] Oxidation<br>(M) | EF1A2_HUMAN | Elongation factor 1-<br>alpha 2                   |
| 40,301     | 2 | 546,295 | 1090,575 | -0,002 | -1,888 | 38,58 | VNFTVDQIR                    |                       | EF2_HUMAN   | Elongation factor 2                               |
| 48,806     | 2 | 567,828 | 1133,642 | -0,002 | -1,906 | 42,48 | SLNILTAFQK                   |                       | ERP29_HUMAN | Endoplasmic<br>reticulum resident<br>protein 29   |
| 44,253     | 3 | 784,423 | 2350,248 | -0,003 | -1,158 | 29,85 | TVATPLNQVAN<br>PNSAIFGGARPR  |                       | IF4H_HUMAN  | Eukaryotic translation<br>initiation factor 4H    |
| 44,790     | 2 | 723,401 | 1444,788 | -0,001 | -0,597 | 78,09 | QLLTLSSELSQAR                |                       | EZRI_HUMAN  | Ezrin                                             |

|        |   |              |          |        |        |       |                            |             |                                                 |
|--------|---|--------------|----------|--------|--------|-------|----------------------------|-------------|-------------------------------------------------|
| 50,709 | 4 | 592,828      | 2367,283 | -0,002 | -0,824 | 28,85 | ITHYQLNFQTGL<br>LVPAHIFR   | FBLN2_HUMAN | Fibulin-2                                       |
| 36,910 | 3 | 521,611      | 1561,810 | -0,004 | -2,276 | 30,26 | PYQYPALTPEQK<br>K          | ALDOA_HUMAN | Fructose-bisphosphate<br>aldolase A             |
| 43,310 | 2 | 1114,51<br>6 | 2227,017 | -0,001 | -0,320 | 63,4  | YTPSGQAGAAAS<br>ESLFVSNHAY | ALDOA_HUMAN | Fructose-bisphosphate<br>aldolase A             |
| 33,350 | 2 | 544,771      | 1087,527 | 0,005  | 4,880  | 25,24 | CTIEEAPPTK                 | CCNB3_HUMAN | G2/mitotic-specific<br>cyclin-B3                |
| 38,571 | 3 | 425,207      | 1272,598 | -0,002 | -1,320 | 26,25 | GNDVAFHFNPR                | LEG3_HUMAN  | Galectin-3                                      |
| 46,003 | 3 | 547,655      | 1639,942 | -0,002 | -1,294 | 25,73 | MLITILGTVKPN<br>ANR        | LEG3_HUMAN  | Galectin-3                                      |
| 45,625 | 3 | 680,024      | 2037,051 | -0,002 | -1,142 | 32,53 | VTGPEGALFEHS<br>VETPLVR    | SGCG_HUMAN  | Gamma-sarcoglycan                               |
| 35,413 | 2 | 378,237      | 754,459  | 0,000  | -0,400 | 25,03 | AVEVLPK                    | GELS_HUMAN  | Gelsolin                                        |
| 33,443 | 2 | 403,219      | 804,424  | -0,001 | -0,811 | 43,55 | VGVNGFGR                   | G3P_HUMAN   | Glyceraldehyde-3-<br>phosphate<br>dehydrogenase |
| 33,126 | 2 | 403,219      | 804,424  | 0,000  | -0,612 | 46,66 | VGVNGFGR                   | G3P_HUMAN   | Glyceraldehyde-3-<br>phosphate<br>dehydrogenase |
| 30,105 | 2 | 533,298      | 1064,582 | -0,002 | -1,934 | 31,49 | AGAHLQGGAKR                | G3P_HUMAN   | Glyceraldehyde-3-<br>phosphate<br>dehydrogenase |
| 41,934 | 2 | 706,398      | 1410,782 | -0,002 | -1,086 | 58,42 | GALQNIIPASTG<br>AAK        | G3P_HUMAN   | Glyceraldehyde-3-<br>phosphate<br>dehydrogenase |

|        |   |         |          |        |        |       |                              |             |           |             |                                             |
|--------|---|---------|----------|--------|--------|-------|------------------------------|-------------|-----------|-------------|---------------------------------------------|
| 58,858 | 4 | 649,595 | 2594,351 | -0,002 | -0,683 | 55,38 | VIHDNFGIVEGL<br>MTTVHAITATQK |             |           | G3P_HUMAN   | Glyceraldehyde-3-phosphate<br>dehydrogenase |
| 58,874 | 3 | 865,791 | 2594,352 | -0,001 | -0,450 | 71,86 | VIHDNFGIVEGL<br>MTTVHAITATQK |             |           | G3P_HUMAN   | Glyceraldehyde-3-phosphate<br>dehydrogenase |
| 51,785 | 4 | 653,594 | 2610,346 | -0,002 | -0,631 | 28,79 | VIHDNFGIVEGL<br>MTTVHAITATQK | [13]<br>(M) | Oxidation | G3P_HUMAN   | Glyceraldehyde-3-phosphate<br>dehydrogenase |
| 52,008 | 4 | 653,594 | 2610,346 | -0,002 | -0,632 | 45,86 | VIHDNFGIVEGL<br>MTTVHAITATQK | [13]<br>(M) | Oxidation | G3P_HUMAN   | Glyceraldehyde-3-phosphate<br>dehydrogenase |
| 52,008 | 3 | 871,123 | 2610,347 | -0,001 | -0,420 | 67,76 | VIHDNFGIVEGL<br>MTTVHAITATQK | [13]<br>(M) | Oxidation | G3P_HUMAN   | Glyceraldehyde-3-phosphate<br>dehydrogenase |
| 51,806 | 3 | 871,123 | 2610,347 | -0,001 | -0,286 | 48,8  | VIHDNFGIVEGL<br>MTTVHAITATQK | [13]<br>(M) | Oxidation | G3P_HUMAN   | Glyceraldehyde-3-phosphate<br>dehydrogenase |
| 30,873 | 2 | 502,273 | 1002,531 | -0,004 | -3,538 | 37,79 | LSKEEIER                     |             |           | HSP71_HUMAN | Heat shock 70 kDa<br>protein 1A/1B          |
| 32,339 | 2 | 614,816 | 1227,618 | -0,003 | -2,326 | 26,78 | VEIANDQGNR                   |             |           | HSP71_HUMAN | Heat shock 70 kDa<br>protein 1A/1B          |
| 33,302 | 2 | 616,823 | 1231,632 | -0,002 | -1,752 | 31,53 | AMTKDNNLLGR                  |             |           | HSP71_HUMAN | Heat shock 70 kDa<br>protein 1A/1B          |
| 39,159 | 2 | 652,303 | 1302,591 | 0,000  | -0,256 | 55,78 | NALESYAFNMK                  | [10]<br>(M) | Oxidation | HSP71_HUMAN | Heat shock 70 kDa<br>protein 1A/1B          |

|        |   |         |          |        |        |       |                       |             |                                   |
|--------|---|---------|----------|--------|--------|-------|-----------------------|-------------|-----------------------------------|
| 39,535 | 2 | 744,354 | 1486,694 | 0,000  | -0,084 | 46,55 | TTPSYVAFTDTER         | HSP71_HUMAN | Heat shock 70 kDa protein 1A/1B   |
| 39,194 | 3 | 605,655 | 1813,942 | -0,002 | -0,919 | 27,03 | NQVALNPQNTV<br>FDAKR  | HSP71_HUMAN | Heat shock 70 kDa protein 1A/1B   |
| 32,339 | 2 | 614,816 | 1227,618 | -0,003 | -2,326 | 26,78 | VEILANDQGNR           | HSP76_HUMAN | Heat shock 70 kDa protein 6       |
| 33,302 | 2 | 616,823 | 1231,632 | -0,002 | -1,752 | 31,53 | AMTKDNNLLGR           | HSP76_HUMAN | Heat shock 70 kDa protein 6       |
| 39,535 | 2 | 744,354 | 1486,694 | 0,000  | -0,084 | 46,55 | TTPSYVAFTDTER         | HSP76_HUMAN | Heat shock 70 kDa protein 6       |
| 32,339 | 2 | 614,816 | 1227,618 | -0,003 | -2,326 | 26,78 | VEIANDQGNR            | HSP7C_HUMAN | Heat shock cognate 71 kDa protein |
| 46,480 | 2 | 627,311 | 1252,608 | -0,001 | -0,551 | 31,67 | FEELNADLFR            | HSP7C_HUMAN | Heat shock cognate 71 kDa protein |
| 39,535 | 2 | 744,354 | 1486,694 | 0,000  | -0,084 | 46,55 | TTPSYVAFTDTER         | HSP7C_HUMAN | Heat shock cognate 71 kDa protein |
| 42,114 | 2 | 494,308 | 986,600  | -0,002 | -2,053 | 31,35 | RVPFSLLR              | HSPB1_HUMAN | Heat shock protein beta-1         |
| 34,670 | 2 | 538,290 | 1074,565 | -0,002 | -2,024 | 66,71 | QLSSGVSEIR            | HSPB1_HUMAN | Heat shock protein beta-1         |
| 34,314 | 2 | 538,290 | 1074,565 | -0,002 | -1,798 | 35,47 | QLSSGVSEIR            | HSPB1_HUMAN | Heat shock protein beta-1         |
| 46,568 | 2 | 582,313 | 1162,612 | -0,001 | -1,182 | 51,02 | LFDQAFGLPR            | HSPB1_HUMAN | Heat shock protein beta-1         |
| 46,350 | 2 | 953,499 | 1904,984 | -0,001 | -0,306 | 39,76 | LATQSNEITIPVT<br>FESR | HSPB1_HUMAN | Heat shock protein beta-1         |

|        |   |          |          |        |        |       |                                                     |          |           |             |                                            |
|--------|---|----------|----------|--------|--------|-------|-----------------------------------------------------|----------|-----------|-------------|--------------------------------------------|
| 47,702 | 3 | 1076,231 | 3225,671 | 0,023  | 7,060  | 26,02 | KYTLPPGVDPTQ<br>VSSLSPEGLTLV<br>EAPMPK              |          |           | HSPB1_HUMAN | Heat shock protein beta-1                  |
| 46,584 | 3 | 1081,554 | 3241,642 | -0,001 | -0,391 | 31,36 | KYTLPPGVDPTQ<br>VSSLSPEGLTLV<br>EAPMPK              | [29] (M) | Oxidation | HSPB1_HUMAN | Heat shock protein beta-1                  |
| 51,463 | 3 | 1279,691 | 3836,050 | 0,003  | 0,659  | 46,57 | YRLPPGVDPAAV<br>TSALSPEGVLSIQ<br>AAPASQAAPPA<br>AAK |          |           | HSPB6_HUMAN | Heat shock protein beta-6                  |
| 32,339 | 2 | 614,816  | 1227,618 | -0,003 | -2,326 | 26,78 | VEIANDQGNR                                          |          |           | HSP72_HUMAN | Heat shock-related 70 kDa protein 2        |
| 46,480 | 2 | 627,311  | 1252,608 | -0,001 | -0,551 | 31,67 | FEELNADLFR                                          |          |           | HSP72_HUMAN | Heat shock-related 70 kDa protein 2        |
| 39,535 | 2 | 744,354  | 1486,694 | 0,000  | -0,084 | 46,55 | TTPSYVAFTDTER                                       |          |           | HSP72_HUMAN | Heat shock-related 70 kDa protein 2        |
| 46,243 | 2 | 536,280  | 1070,545 | -0,002 | -1,744 | 32,39 | MFLSFPTTK                                           |          |           | HBA_HUMAN   | Hemoglobin subunit alpha                   |
| 33,317 | 3 | 510,582  | 1528,723 | -0,004 | -2,410 | 65,55 | VGAHAGEYGAE<br>ALER                                 |          |           | HBA_HUMAN   | Hemoglobin subunit alpha                   |
| 33,317 | 2 | 765,370  | 1528,725 | -0,002 | -0,982 | 45,35 | VGAHAGEYGAE<br>ALER                                 |          |           | HBA_HUMAN   | Hemoglobin subunit alpha                   |
| 34,775 | 2 | 814,893  | 1627,772 | -0,002 | -1,413 | 58,18 | SSGPYGGGGQYF<br>AKPR                                |          |           | ROA1_HUMAN  | Heterogeneous nuclear ribonucleoprotein A1 |
| 36,511 | 2 | 507,224  | 1012,434 | -0,003 | -2,595 | 28,87 | GGNFGFGDSR                                          |          |           | ROA2_HUMAN  | Heterogeneous                              |

|        |   |              |          |        |        |       |                                   |            |           |             |                                                         |
|--------|---|--------------|----------|--------|--------|-------|-----------------------------------|------------|-----------|-------------|---------------------------------------------------------|
|        |   |              |          |        |        |       |                                   |            |           |             | nuclear<br>ribonucleoproteins<br>A2/B1                  |
| 33,797 | 2 | 1095,45<br>6 | 2188,898 | -0,001 | -0,241 | 43,72 | NMGGPYGGGNY<br>GPGGSGGSGGY<br>GGR |            |           | ROA2_HUMAN  | Heterogeneous<br>nuclear<br>ribonucleoproteins<br>A2/B1 |
| 33,866 | 2 | 472,289      | 942,563  | -0,002 | -2,608 | 36,36 | VPPPPPIAR                         |            |           | HNRPC_HUMAN | Heterogeneous<br>nuclear<br>ribonucleoproteins<br>C1/C2 |
| 41,271 | 2 | 727,862      | 1453,709 | -0,003 | -2,024 | 29,74 | YSDMIVAAIQAE<br>K                 | [4]<br>(M) | Oxidation | H10_HUMAN   | Histone H1.0                                            |
| 36,977 | 2 | 487,305      | 972,595  | -0,002 | -2,041 | 45,36 | SGVSLAALKK                        |            |           | H13_HUMAN   | Histone H1.3                                            |
| 34,505 | 2 | 554,286      | 1106,558 | -0,002 | -2,142 | 44,01 | ALAAAGYDVEK                       |            |           | H13_HUMAN   | Histone H1.3                                            |
| 34,175 | 2 | 554,287      | 1106,559 | -0,002 | -2,033 | 47,87 | ALAAAGYDVEK                       |            |           | H13_HUMAN   | Histone H1.3                                            |
| 39,888 | 2 | 599,837      | 1197,659 | -0,001 | -0,959 | 64,14 | ASGPPVSELITK                      |            |           | H13_HUMAN   | Histone H1.3                                            |
| 34,505 | 2 | 630,879      | 1259,743 | -0,002 | -1,752 | 47,69 | SLVSKGTLVQTK                      |            |           | H13_HUMAN   | Histone H1.3                                            |
| 37,841 | 2 | 663,883      | 1325,752 | -0,004 | -2,763 | 42,44 | KASGPPVSELITK                     |            |           | H13_HUMAN   | Histone H1.3                                            |
| 34,505 | 2 | 630,879      | 1259,743 | -0,002 | -1,752 | 47,69 | SLVSKGTLVQTK                      |            |           | H15_HUMAN   | Histone H1.5                                            |
| 34,505 | 2 | 554,286      | 1106,558 | -0,002 | -2,142 | 44,01 | ALAAAGYDVEK                       |            |           | H1T_HUMAN   | Histone H1t                                             |
| 34,175 | 2 | 554,287      | 1106,559 | -0,002 | -2,033 | 47,87 | ALAAAGYDVEK                       |            |           | H1T_HUMAN   | Histone H1t                                             |
| 42,568 | 2 | 671,390      | 1340,765 | -0,001 | -1,041 | 27,41 | ALVQNDTLLQV<br>K                  |            |           | H1X_HUMAN   | Histone H1x                                             |
| 41,083 | 2 | 472,769      | 943,524  | 0,000  | -0,467 | 61,97 | AGLQFPVGR                         |            |           | H2A2A_HUMAN | Histone H2A type 2-A                                    |
| 55,118 | 3 | 644,394      | 1930,160 | -0,002 | -1,009 | 52,33 | VTIAQGGVLPNI                      |            |           | H2A2A_HUMAN | Histone H2A type 2-A                                    |



|         |   |         |          |        |        |        |               |           |               |              |  |                           |                      |
|---------|---|---------|----------|--------|--------|--------|---------------|-----------|---------------|--------------|--|---------------------------|----------------------|
| 55,118  | 2 | 966,087 | 1930,160 | -0,001 | -0,636 | 86,75  | QAVLLPK       |           |               | VTIAQGGVLPNI |  | H2A2A_HUMAN               | Histone H2A type 2-A |
| QAVLLPK |   |         |          |        |        |        |               |           |               |              |  |                           |                      |
| 28,014  | 2 | 414,713 | 827,412  | -0,002 | -2,566 | 35,25  | HAVSEGTK      |           |               | H2B1B_HUMAN  |  | Histone H2B type 1-B      |                      |
| 43,438  | 2 | 477,305 | 952,595  | 0,000  | -0,386 | 49,38  | LLLPGELAK     |           |               | H2B1B_HUMAN  |  | Histone H2B type 1-B      |                      |
| 56,898  | 2 | 872,413 | 1742,811 | -0,001 | -0,479 | 88,66  | AMGIMNSFVNDI  |           |               | H2B1B_HUMAN  |  | Histone H2B type 1-B      |                      |
| FER     |   |         |          |        |        |        |               |           |               |              |  |                           |                      |
| 54,061  | 2 | 880,410 | 1758,806 | -0,001 | -0,331 | 104,62 | AMGIMNSFVNDI  | [2]       | Oxidation     | H2B1B_HUMAN  |  | Histone H2B type 1-B      |                      |
|         |   |         |          |        |        |        | FER           | (M)       |               |              |  |                           |                      |
| 51,073  | 2 | 880,411 | 1758,806 | 0,000  | -0,254 | 60,13  | AMGIMNSFVNDI  | [5]       | Oxidation     | H2B1B_HUMAN  |  | Histone H2B type 1-B      |                      |
|         |   |         |          |        |        |        | FER           | (M)       |               |              |  |                           |                      |
| 49,131  | 2 | 888,408 | 1774,801 | -0,001 | -0,337 | 48,88  | AMGIMNSFVNDI  | [2]       | Oxidation     | H2B1B_HUMAN  |  | Histone H2B type 1-B      |                      |
|         |   |         |          |        |        |        | FER           | (M)   [5] |               |              |  |                           |                      |
|         |   |         |          |        |        |        |               |           | Oxidation (M) |              |  |                           |                      |
| 34,053  | 2 | 344,706 | 687,398  | -0,001 | -1,054 | 35,49  | VTIMPK        |           |               | H31T_HUMAN   |  | Histone H3.1t             |                      |
| 29,220  | 2 | 344,721 | 687,427  | -0,001 | -1,467 | 27,64  | KQLATK        |           |               | H31T_HUMAN   |  | Histone H3.1t             |                      |
| 38,962  | 2 | 416,250 | 830,486  | 0,000  | 0,203  | 29,06  | STELLIR       |           |               | H31T_HUMAN   |  | Histone H3.1t             |                      |
| 32,339  | 3 | 344,870 | 1031,587 | 0,000  | -0,248 | 28,91  | YRPGTVALR     |           |               | H31T_HUMAN   |  | Histone H3.1t             |                      |
| 37,034  | 2 | 663,380 | 1324,745 | -0,001 | -0,870 | 45,61  | DNIQGITKPAIR  |           |               | H4_HUMAN     |  | Histone H4                |                      |
| 46,279  | 2 | 733,905 | 1465,795 | -0,002 | -1,202 | 61,03  | TVTAMDVVYAL   |           |               | H4_HUMAN     |  | Histone H4                |                      |
| KR      |   |         |          |        |        |        |               |           |               |              |  |                           |                      |
| 33,642  | 3 | 494,622 | 1480,844 | -0,004 | -2,386 | 29,78  | DNIQGITKPAIRR |           |               | H4_HUMAN     |  | Histone H4                |                      |
| 42,398  | 3 | 494,937 | 1481,789 | -0,003 | -1,789 | 30,06  | TVTAMDVVYAL   | [5]       | Oxidation     | H4_HUMAN     |  | Histone H4                |                      |
|         |   |         |          |        |        |        | KR            | (M)       |               |              |  |                           |                      |
| 33,217  | 2 | 426,221 | 850,428  | 0,006  | 7,566  | 26,56  | DTLMISR       | [4]       | Oxidation     | IGHG1_HUMAN  |  | Ig gamma-1 chain C region |                      |
|         |   |         |          |        |        |        |               | (M)       |               |              |  |                           |                      |

|        |   |         |          |        |        |       |                                        |            |                        |                                        |
|--------|---|---------|----------|--------|--------|-------|----------------------------------------|------------|------------------------|----------------------------------------|
| 42,035 | 2 | 593,826 | 1185,637 | -0,002 | -1,613 | 39,48 | GPSVFPLAPSSK                           |            | IGHG1_HUMAN            | Ig gamma-1 chain C region              |
| 56,442 | 2 | 855,911 | 1709,808 | 0,003  | 1,994  | 25,14 | FEAAETLEEAAM<br>RSR                    |            | KLC1_HUMAN             | Kinesin light chain 1                  |
| 39,805 | 3 | 794,722 | 2381,144 | -0,002 | -0,970 | 40,67 | VAPQQDDLDSF<br>QQISISNAEAR             |            | LAMA2_HUMAN            | Laminin subunit alpha-2                |
| 49,431 | 2 | 607,295 | 1212,576 | -0,001 | -1,129 | 33,46 | DGFFGLSISDR                            |            | LAMB2_HUMAN            | Laminin subunit beta-2                 |
| 31,485 | 2 | 924,941 | 1847,867 | 0,006  | 3,493  | 52,86 | AGNSLAATAEE<br>TAGSAQGR                |            | LAMB2_HUMAN            | Laminin subunit beta-2                 |
| 33,698 | 2 | 816,397 | 1630,779 | 0,000  | -0,243 | 27,26 | EAQQALGSAAA<br>DATEAK                  |            | LAMC1_HUMAN            | Laminin subunit gamma-1                |
| 42,583 | 2 | 662,858 | 1323,702 | -0,001 | -0,964 | 33,76 | SASYNLSLTLQK                           |            | LDB3_HUMAN             | LIM domain-binding protein 3           |
| 40,570 | 2 | 824,943 | 1647,872 | -0,001 | -0,653 | 61,58 | GGPAYTPAGPQ<br>VPPLAR                  |            | LDB3_HUMAN             | LIM domain-binding protein 3           |
| 51,660 | 3 | 970,537 | 2908,590 | -0,001 | -0,360 | 27,86 | ASGVGLPGGSLPI<br>KDLAVDSASPVY<br>QAVIK |            | LDB3_HUMAN             | LIM domain-binding protein 3           |
| 37,306 | 2 | 457,294 | 912,574  | -0,001 | -1,456 | 38,43 | IVVVTAGVR                              |            | LDHB_HUMAN             | L-lactate dehydrogenase B chain        |
| 45,506 | 2 | 512,781 | 1023,548 | -0,002 | -1,851 | 26,88 | FNALQYLR                               |            | LUM_HUMAN              | Lumican                                |
| 40,356 | 2 | 652,343 | 1302,672 | -0,003 | -2,474 | 41,21 | PMFIVNTNVPR                            | [2]<br>(M) | Oxidation<br>MIF_HUMAN | Macrophage migration inhibitory factor |

|        |   |         |          |        |        |       |                            |             |                                     |
|--------|---|---------|----------|--------|--------|-------|----------------------------|-------------|-------------------------------------|
| 32,270 | 2 | 322,210 | 642,406  | 0,000  | -0,131 | 33,2  | AQIALK                     | MDHC_HUMAN  | Malate dehydrogenase, cytoplasmic   |
| 34,018 | 2 | 582,803 | 1163,591 | -0,003 | -2,189 | 35,89 | GEFVTTVQQR                 | MDHC_HUMAN  | Malate dehydrogenase, cytoplasmic   |
| 33,698 | 2 | 582,803 | 1163,591 | -0,002 | -1,949 | 28,03 | GEFVTTVQQR                 | MDHC_HUMAN  | Malate dehydrogenase, cytoplasmic   |
| 56,769 | 2 | 897,048 | 1792,081 | -0,002 | -0,934 | 40,47 | VAVLGASGGIGQ<br>PLSLLK     | MDHM_HUMAN  | Malate dehydrogenase, mitochondrial |
| 49,007 | 3 | 789,084 | 2364,231 | -0,001 | -0,573 | 31,54 | LTLYDIAHTPGV<br>AADLSHIETK | MDHM_HUMAN  | Malate dehydrogenase, mitochondrial |
| 44,094 | 2 | 530,774 | 1059,533 | -0,002 | -1,560 | 34,27 | DFADIPNLR                  | MIME_HUMAN  | Mimecan                             |
| 64,653 | 4 | 507,747 | 2026,959 | 0,011  | 5,532  | 32,96 | TETTMSPLTNTT<br>TSQGTTR    | MUC5B_HUMAN | Mucin-5B                            |
| 42,771 | 2 | 374,721 | 747,428  | 0,000  | 0,026  | 40,82 | ALELFR                     | MYG_HUMAN   | Myoglobin                           |
| 38,874 | 2 | 438,769 | 875,523  | 0,000  | -0,435 | 44,21 | ALELFRK                    | MYG_HUMAN   | Myoglobin                           |
| 49,528 | 3 | 450,941 | 1349,802 | -0,001 | -1,019 | 49,4  | HGATVLTALGGI<br>LK         | MYG_HUMAN   | Myoglobin                           |
| 49,528 | 2 | 675,908 | 1349,802 | -0,001 | -0,537 | 86,21 | HGATVLTALGGI<br>LK         | MYG_HUMAN   | Myoglobin                           |
| 46,685 | 3 | 493,639 | 1477,896 | -0,002 | -1,621 | 70,53 | HGATVLTALGGI<br>LKK        | MYG_HUMAN   | Myoglobin                           |

|        |   |         |          |        |        |       |                                    |             |                         |                            |
|--------|---|---------|----------|--------|--------|-------|------------------------------------|-------------|-------------------------|----------------------------|
| 38,502 | 2 | 698,880 | 1395,746 | -0,001 | -0,715 | 32,13 | ALGQNPTQAEV<br>LR                  |             | MYL3_HUMAN              | Myosin light chain 3       |
| 32,855 | 2 | 484,281 | 966,548  | -0,002 | -2,157 | 45,45 | HVLATLGEK                          |             | MYL4_HUMAN              | Myosin light chain 4       |
| 32,511 | 2 | 484,281 | 966,548  | -0,002 | -2,153 | 35,83 | HVLATLGEK                          |             | MYL4_HUMAN              | Myosin light chain 4       |
| 36,814 | 2 | 632,303 | 1262,592 | 0,000  | -0,335 | 47,85 | ESNGTVMGAEL<br>R                   |             | MYL4_HUMAN              | Myosin light chain 4       |
| 37,306 | 2 | 691,872 | 1381,730 | -0,001 | -0,921 | 63,56 | ALGQNPTNAEV<br>LR                  |             | MYL4_HUMAN              | Myosin light chain 4       |
| 63,526 | 3 | 654,016 | 1959,027 | -0,002 | -0,943 | 72,2  | MLDFETFLPILQ<br>HISR               |             | MYL4_HUMAN              | Myosin light chain 4       |
| 63,526 | 2 | 980,521 | 1959,027 | -0,002 | -0,903 | 72,34 | MLDFETFLPILQ<br>HISR               |             | MYL4_HUMAN              | Myosin light chain 4       |
| 60,449 | 3 | 659,348 | 1975,022 | -0,002 | -0,909 | 66,89 | MLDFETFLPILQ<br>HISR               | [1]<br>(M)  | Oxidation<br>MYL4_HUMAN | Myosin light chain 4       |
| 60,473 | 2 | 988,518 | 1975,022 | -0,002 | -0,796 | 84,67 | MLDFETFLPILQ<br>HISR               | [1]<br>(M)  | Oxidation<br>MYL4_HUMAN | Myosin light chain 4       |
| 31,485 | 4 | 604,085 | 2412,310 | -0,006 | -2,577 | 29,4  | KEAAKPAPAPAP<br>APAPAPAPAPEA<br>PK |             | MYL4_HUMAN              | Myosin light chain 4       |
| 31,485 | 3 | 805,112 | 2412,313 | -0,004 | -1,540 | 31,39 | KEAAKPAPAPAP<br>APAPAPAPAPEA<br>PK |             | MYL4_HUMAN              | Myosin light chain 4       |
| 57,969 | 3 | 630,006 | 1886,995 | -0,002 | -0,830 | 33,26 | VLDFEHFLPMLQ<br>TVAK               |             | MYL6_HUMAN              | Myosin light polypeptide 6 |
| 53,435 | 3 | 635,337 | 1902,989 | -0,003 | -1,422 | 29,4  | VLDFEHFLPMLQ<br>TVAK               | [10]<br>(M) | Oxidation<br>MYL6_HUMAN | Myosin light polypeptide 6 |

|        |   |         |          |        |        |       |              |      |           |             |           |
|--------|---|---------|----------|--------|--------|-------|--------------|------|-----------|-------------|-----------|
| 33,078 | 2 | 530,761 | 1059,507 | -0,002 | -2,099 | 50,2  | ANSEVAQWR    |      |           | MYH13_HUMAN | Myosin-13 |
| 56,261 | 2 | 601,333 | 1200,652 | -0,001 | -1,241 | 49,29 | AGLLGLLEEMR  |      |           | MYH13_HUMAN | Myosin-13 |
| 49,754 | 2 | 609,331 | 1216,647 | -0,002 | -1,419 | 52,9  | AGLLGLLEEMR  | [10] | Oxidation | MYH13_HUMAN | Myosin-13 |
|        |   |         |          |        |        |       |              | (M)  |           |             |           |
| 34,209 | 2 | 672,366 | 1342,718 | -0,003 | -1,942 | 57,16 | ADIAESQVNKLR |      |           | MYH13_HUMAN | Myosin-13 |
| 34,209 | 3 | 448,580 | 1342,719 | -0,002 | -1,216 | 31,1  | ADIAESQVNKLR |      |           | MYH13_HUMAN | Myosin-13 |
| 33,585 | 3 | 448,580 | 1342,719 | -0,002 | -1,123 | 29,21 | ADIAESQVNKLR |      |           | MYH13_HUMAN | Myosin-13 |
| 33,585 | 2 | 672,367 | 1342,719 | -0,002 | -1,121 | 64,73 | ADIAESQVNKLR |      |           | MYH13_HUMAN | Myosin-13 |
| 56,261 | 2 | 601,333 | 1200,652 | -0,001 | -1,241 | 49,29 | AGLLGLLEEMR  |      |           | MYH2_HUMAN  | Myosin-2  |
| 49,754 | 2 | 609,331 | 1216,647 | -0,002 | -1,419 | 52,9  | AGLLGLLEEMR  | [10] | Oxidation | MYH2_HUMAN  | Myosin-2  |
|        |   |         |          |        |        |       |              | (M)  |           |             |           |
| 34,209 | 2 | 672,366 | 1342,718 | -0,003 | -1,942 | 57,16 | ADIAESQVNKLR |      |           | MYH2_HUMAN  | Myosin-2  |
| 34,209 | 3 | 448,580 | 1342,719 | -0,002 | -1,216 | 31,1  | ADIAESQVNKLR |      |           | MYH2_HUMAN  | Myosin-2  |
| 33,585 | 3 | 448,580 | 1342,719 | -0,002 | -1,123 | 29,21 | ADIAESQVNKLR |      |           | MYH2_HUMAN  | Myosin-2  |
| 33,585 | 2 | 672,367 | 1342,719 | -0,002 | -1,121 | 64,73 | ADIAESQVNKLR |      |           | MYH2_HUMAN  | Myosin-2  |
| 33,078 | 2 | 530,761 | 1059,507 | -0,002 | -2,099 | 50,2  | ANSEVAQWR    |      |           | MYH3_HUMAN  | Myosin-3  |
| 34,209 | 2 | 672,366 | 1342,718 | -0,003 | -1,942 | 57,16 | ADIAESQVNKLR |      |           | MYH3_HUMAN  | Myosin-3  |
| 34,209 | 3 | 448,580 | 1342,719 | -0,002 | -1,216 | 31,1  | ADIAESQVNKLR |      |           | MYH3_HUMAN  | Myosin-3  |
| 33,585 | 3 | 448,580 | 1342,719 | -0,002 | -1,123 | 29,21 | ADIAESQVNKLR |      |           | MYH3_HUMAN  | Myosin-3  |
| 33,585 | 2 | 672,367 | 1342,719 | -0,002 | -1,121 | 64,73 | ADIAESQVNKLR |      |           | MYH3_HUMAN  | Myosin-3  |
| 39,159 | 2 | 442,237 | 882,460  | 0,000  | -0,395 | 30,66 | ILYGDFR      |      |           | MYH6_HUMAN  | Myosin-6  |
| 33,078 | 2 | 530,761 | 1059,507 | -0,002 | -2,099 | 50,2  | ANSEVAQWR    |      |           | MYH6_HUMAN  | Myosin-6  |
| 35,149 | 2 | 541,266 | 1080,518 | -0,002 | -1,894 | 50,48 | SLNDFTTQR    |      |           | MYH6_HUMAN  | Myosin-6  |
| 56,261 | 2 | 601,333 | 1200,652 | -0,001 | -1,241 | 49,29 | AGLLGLLEEMR  |      |           | MYH6_HUMAN  | Myosin-6  |
| 49,754 | 2 | 609,331 | 1216,647 | -0,002 | -1,419 | 52,9  | AGLLGLLEEMR  | [10] | Oxidation | MYH6_HUMAN  | Myosin-6  |
|        |   |         |          |        |        |       |              | (M)  |           |             |           |

|        |   |         |          |        |        |       |                        |            |          |
|--------|---|---------|----------|--------|--------|-------|------------------------|------------|----------|
| 43,438 | 3 | 438,266 | 1311,775 | -0,001 | -0,995 | 25,28 | LQDLVDKLQLK            | MYH6_HUMAN | Myosin-6 |
| 34,209 | 2 | 672,366 | 1342,718 | -0,003 | -1,942 | 57,16 | ADIAESQVNKLR           | MYH6_HUMAN | Myosin-6 |
| 34,209 | 3 | 448,580 | 1342,719 | -0,002 | -1,216 | 31,1  | ADIAESQVNKLR           | MYH6_HUMAN | Myosin-6 |
| 33,585 | 3 | 448,580 | 1342,719 | -0,002 | -1,123 | 29,21 | ADIAESQVNKLR           | MYH6_HUMAN | Myosin-6 |
| 33,585 | 2 | 672,367 | 1342,719 | -0,002 | -1,121 | 64,73 | ADIAESQVNKLR           | MYH6_HUMAN | Myosin-6 |
| 49,886 | 2 | 721,385 | 1440,756 | -0,001 | -0,705 | 53,96 | NNLLQAELEELR           | MYH6_HUMAN | Myosin-6 |
| 48,770 | 2 | 762,414 | 1522,814 | -0,001 | -0,441 | 99,32 | VIQYFASIAAIGD<br>R     | MYH6_HUMAN | Myosin-6 |
| 39,677 | 2 | 767,391 | 1532,768 | 0,000  | -0,215 | 82,04 | VVDSLQTS�DAE<br>TR     | MYH6_HUMAN | Myosin-6 |
| 50,683 | 2 | 874,442 | 1746,870 | -0,001 | -0,498 | 35,04 | LELDDVTSNME<br>QIIK    | MYH6_HUMAN | Myosin-6 |
| 47,816 | 2 | 884,983 | 1767,952 | 0,000  | -0,095 | 66,66 | ILNPVAIPEGQFI<br>DSR   | MYH6_HUMAN | Myosin-6 |
| 40,902 | 3 | 602,654 | 1804,942 | -0,003 | -1,385 | 30,09 | KAPGVMDNPLV<br>MHQLR   | MYH6_HUMAN | Myosin-6 |
| 41,813 | 2 | 919,965 | 1837,916 | -0,001 | -0,533 | 87,12 | DLEEATLQHEAT<br>AAALR  | MYH6_HUMAN | Myosin-6 |
| 41,813 | 3 | 613,646 | 1837,917 | 0,000  | -0,112 | 35,38 | DLEEATLQHEAT<br>AAALR  | MYH6_HUMAN | Myosin-6 |
| 37,098 | 3 | 617,685 | 1850,034 | -0,003 | -1,769 | 48,84 | VQLLHSQNTSLI<br>NQKK   | MYH6_HUMAN | Myosin-6 |
| 45,625 | 3 | 633,022 | 1896,044 | -0,003 | -1,557 | 36,48 | ILNPVAIPEGQFI<br>DSRK  | MYH6_HUMAN | Myosin-6 |
| 39,805 | 3 | 656,344 | 1966,010 | -0,002 | -0,869 | 30,33 | DLEEATLQHEAT<br>AAALRK | MYH6_HUMAN | Myosin-6 |

|        |   |         |          |        |        |       |                                      |             |                         |          |
|--------|---|---------|----------|--------|--------|-------|--------------------------------------|-------------|-------------------------|----------|
| 42,971 | 3 | 662,971 | 1985,890 | -0,003 | -1,550 | 41,6  | MEGDLNEMEIQ<br>LSHANR                |             | MYH6_HUMAN              | Myosin-6 |
| 47,739 | 3 | 666,001 | 1994,982 | -0,003 | -1,361 | 37,82 | HRLQNEIEDLMV<br>DVER                 |             | MYH6_HUMAN              | Myosin-6 |
| 43,885 | 3 | 696,354 | 2086,041 | -0,002 | -1,060 | 38,45 | VKLEQQVDDLE<br>GSLEQEK               |             | MYH6_HUMAN              | Myosin-6 |
| 47,367 | 3 | 696,713 | 2087,116 | -0,001 | -0,287 | 33,09 | YRILNPVAIPEGQ<br>FIDSR               |             | MYH6_HUMAN              | Myosin-6 |
| 50,725 | 2 | 1100,56 | 2199,116 | -0,001 | -0,316 | 49,68 | GTLEDQIIQANP<br>ALEAFGNAK            |             | MYH6_HUMAN              | Myosin-6 |
| 49,272 | 3 | 976,488 | 2926,441 | -0,001 | -0,419 | 43,19 | DNANANKGTLE<br>DQIIQANPALEA<br>FGNAK |             | MYH6_HUMAN              | Myosin-6 |
| 39,159 | 2 | 442,237 | 882,460  | 0,000  | -0,395 | 30,66 | ILYGDFR                              |             | MYH7_HUMAN              | Myosin-7 |
| 33,078 | 2 | 530,761 | 1059,507 | -0,002 | -2,099 | 50,2  | ANSEVAQWR                            |             | MYH7_HUMAN              | Myosin-7 |
| 56,261 | 2 | 601,333 | 1200,652 | -0,001 | -1,241 | 49,29 | AGLLGLLEEMR                          |             | MYH7_HUMAN              | Myosin-7 |
| 49,754 | 2 | 609,331 | 1216,647 | -0,002 | -1,419 | 52,9  | AGLLGLLEEMR                          | [10]<br>(M) | Oxidation<br>MYH7_HUMAN | Myosin-7 |
| 43,438 | 3 | 438,266 | 1311,775 | -0,001 | -0,995 | 25,28 | LQDLVDKLQLK                          |             | MYH7_HUMAN              | Myosin-7 |
| 34,209 | 2 | 672,366 | 1342,718 | -0,003 | -1,942 | 57,16 | ADIAESQVNKLR                         |             | MYH7_HUMAN              | Myosin-7 |
| 34,209 | 3 | 448,580 | 1342,719 | -0,002 | -1,216 | 31,1  | ADIAESQVNKLR                         |             | MYH7_HUMAN              | Myosin-7 |
| 33,585 | 3 | 448,580 | 1342,719 | -0,002 | -1,123 | 29,21 | ADIAESQVNKLR                         |             | MYH7_HUMAN              | Myosin-7 |
| 33,585 | 2 | 672,367 | 1342,719 | -0,002 | -1,121 | 64,73 | ADIAESQVNKLR                         |             | MYH7_HUMAN              | Myosin-7 |
| 49,886 | 2 | 721,385 | 1440,756 | -0,001 | -0,705 | 53,96 | NNLLQAELEELR                         |             | MYH7_HUMAN              | Myosin-7 |
| 39,677 | 2 | 767,391 | 1532,768 | 0,000  | -0,215 | 82,04 | VVDSLQTS�DAE<br>TR                   |             | MYH7_HUMAN              | Myosin-7 |

|        |   |              |          |        |        |       |                           |            |           |             |                                               |
|--------|---|--------------|----------|--------|--------|-------|---------------------------|------------|-----------|-------------|-----------------------------------------------|
| 50,683 | 2 | 874,442      | 1746,870 | -0,001 | -0,498 | 35,04 | LELDDVTSNME<br>QIIK       |            |           | MYH7_HUMAN  | Myosin-7                                      |
| 41,813 | 2 | 919,965      | 1837,916 | -0,001 | -0,533 | 87,12 | DLEEATLQHEAT<br>AAALR     |            |           | MYH7_HUMAN  | Myosin-7                                      |
| 41,813 | 3 | 613,646      | 1837,917 | 0,000  | -0,112 | 35,38 | DLEEATLQHEAT<br>AAALR     |            |           | MYH7_HUMAN  | Myosin-7                                      |
| 37,098 | 3 | 617,685      | 1850,034 | -0,003 | -1,769 | 48,84 | VQLLHSQNTSLI<br>NQKK      |            |           | MYH7_HUMAN  | Myosin-7                                      |
| 39,805 | 3 | 656,344      | 1966,010 | -0,002 | -0,869 | 30,33 | DLEEATLQHEAT<br>AAALRK    |            |           | MYH7_HUMAN  | Myosin-7                                      |
| 42,971 | 3 | 662,971      | 1985,890 | -0,003 | -1,550 | 41,6  | MEGDLNEMEIQ<br>LSHANR     |            |           | MYH7_HUMAN  | Myosin-7                                      |
| 47,739 | 3 | 666,001      | 1994,982 | -0,003 | -1,361 | 37,82 | HRLQNEIEDLMV<br>DVER      |            |           | MYH7_HUMAN  | Myosin-7                                      |
| 43,885 | 3 | 696,354      | 2086,041 | -0,002 | -1,060 | 38,45 | VKLEQQVDDLE<br>GSLEQEK    |            |           | MYH7_HUMAN  | Myosin-7                                      |
| 50,725 | 2 | 1100,56<br>5 | 2199,116 | -0,001 | -0,316 | 49,68 | GTLEDQIIQANP<br>ALEAFGNAK |            |           | MYH7_HUMAN  | Myosin-7                                      |
| 34,018 | 2 | 450,779      | 899,543  | -0,001 | -1,392 | 29,17 | VQLEGKVK                  |            |           | MYH7B_HUMAN | Myosin-7B                                     |
| 41,410 | 2 | 924,952      | 1847,889 | -0,001 | -0,550 | 37,01 | SVEVAAGSPAVF<br>EAETER    |            |           | MYPC3_HUMAN | Myosin-binding<br>protein C, cardiac-<br>type |
| 43,670 | 2 | 786,887      | 1571,760 | -0,002 | -1,143 | 49,39 | DIMLEELSHLSN<br>R         | [3]<br>(M) | Oxidation | MYOZ2_HUMAN | Myozenin-2                                    |
| 39,805 | 2 | 862,436      | 1722,857 | -0,001 | -0,474 | 47,13 | SPPNPDNIAPGY<br>SGPLK     |            |           | MYOZ2_HUMAN | Myozenin-2                                    |



|        |   |         |          |        |        |       |                                                      |             |                                                          |
|--------|---|---------|----------|--------|--------|-------|------------------------------------------------------|-------------|----------------------------------------------------------|
| 43,710 | 2 | 648,387 | 1294,759 | -0,002 | -1,427 | 30,84 | VALSPAGVQNL<br>VK                                    | NNTM_HUMAN  | NAD(P)<br>transhydrogenase,<br>mitochondrial             |
| 35,868 | 2 | 371,235 | 740,455  | 0,001  | 0,780  | 40,11 | ALLTAPR                                              | ANF_HUMAN   | Natriuretic peptides A                                   |
| 37,560 | 2 | 505,826 | 1009,637 | -0,003 | -2,741 | 28,74 | LRALLTAPR                                            | ANF_HUMAN   | Natriuretic peptides A                                   |
| 35,379 | 2 | 680,340 | 1358,666 | -0,002 | -1,543 | 25,52 | LLEENQESLR                                           | NEST_HUMAN  | Nestin                                                   |
| 33,350 | 2 | 544,771 | 1087,527 | -0,010 | -9,004 | 25,3  | NAQKSNQNGK                                           | NPM_HUMAN   | Nucleophosmin                                            |
| 55,110 | 4 | 958,496 | 3829,954 | -0,001 | -0,376 | 33,78 | AENPLGAASAA<br>AALVVDSDAAD<br>TASRPGTSTAAL<br>LAHLQR | OBSCN_HUMAN | Obscurin                                                 |
| 29,644 | 3 | 365,860 | 1094,557 | 0,014  | 12,541 | 25,48 | KITIADCGQF                                           | PAL4A_HUMAN | Peptidyl-prolyl cis-<br>trans isomerase A-like<br>4A/B/C |
| 44,869 | 3 | 726,402 | 2176,184 | 0,006  | 2,905  | 35,38 | TVLTGTKDTVTT<br>GVMGAVNLAK                           | PLIN4_HUMAN | Perilipin-4                                              |
| 39,888 | 2 | 655,306 | 1308,597 | -0,001 | -1,082 | 49,06 | NLQEAEWYK                                            | PERI_HUMAN  | Peripherin                                               |
| 39,025 | 2 | 554,305 | 1106,595 | -0,002 | -1,999 | 25,88 | TIAQDYGVLK                                           | PRDX1_HUMAN | Peroxiredoxin-1                                          |
| 45,315 | 3 | 593,657 | 1777,950 | -0,001 | -0,726 | 31,58 | QGGLGPMNIPLV<br>SDPKR                                | PRDX1_HUMAN | Peroxiredoxin-1                                          |
| 49,886 | 2 | 549,313 | 1096,611 | -0,002 | -1,553 | 51,55 | VLPGVDALSNI                                          | PGK1_HUMAN  | Phosphoglycerate<br>kinase 1                             |
| 40,491 | 3 | 545,601 | 1633,781 | -0,004 | -2,366 | 31,93 | LGDVYVNDAFG<br>TAHR                                  | PGK1_HUMAN  | Phosphoglycerate<br>kinase 1                             |
| 30,705 | 2 | 488,248 | 974,481  | -0,004 | -4,203 | 36,63 | AMEAVAAQGK                                           | PGAM2_HUMAN | Phosphoglycerate<br>mutase 2                             |

|        |   |         |          |        |        |        |                           |            |           |             |                                                      |
|--------|---|---------|----------|--------|--------|--------|---------------------------|------------|-----------|-------------|------------------------------------------------------|
| 29,781 | 2 | 560,293 | 1118,572 | -0,003 | -2,826 | 41,66  | KAMEAVAAQGK               | [3]<br>(M) | Oxidation | PGAM2_HUMAN | Phosphoglycerate mutase 2                            |
| 34,480 | 2 | 575,837 | 1149,659 | -0,003 | -2,259 | 53,36  | VLIAAHGNSLR               |            |           | PGAM2_HUMAN | Phosphoglycerate mutase 2                            |
| 34,053 | 2 | 575,837 | 1149,660 | -0,002 | -1,864 | 45,55  | VLIAAHGNSLR               |            |           | PGAM2_HUMAN | Phosphoglycerate mutase 2                            |
| 46,350 | 2 | 893,951 | 1785,887 | -0,010 | -5,625 | 30,64  | GQGDESERIVIN<br>VGGTR     |            |           | KCNC1_HUMAN | Potassium voltage-gated channel subfamily C member 1 |
| 31,246 | 2 | 488,727 | 975,440  | -0,001 | -1,518 | 88,56  | AGFAGDDAPR                |            |           | POTEE_HUMAN | POTE ankyrin domain family member E                  |
| 40,077 | 2 | 599,855 | 1197,696 | -0,002 | -2,086 | 41,77  | AVFPSIVGRPR               |            |           | POTEE_HUMAN | POTE ankyrin domain family member E                  |
| 40,077 | 3 | 400,241 | 1197,701 | 0,003  | 2,297  | 33,51  | AVFPSIVGRPR               |            |           | POTEE_HUMAN | POTE ankyrin domain family member E                  |
| 45,436 | 2 | 895,949 | 1789,884 | -0,001 | -0,339 | 122,91 | SYELPDGQVITIG<br>NER      |            |           | POTEE_HUMAN | POTE ankyrin domain family member E                  |
| 44,400 | 2 | 895,949 | 1789,884 | -0,001 | -0,313 | 28,06  | SYELPDGQVITIG<br>NER      |            |           | POTEE_HUMAN | POTE ankyrin domain family member E                  |
| 43,392 | 3 | 656,697 | 1967,070 | -0,002 | -1,235 | 25,89  | VAPEEHPILLTEA<br>PLNPK    |            |           | POTEE_HUMAN | POTE ankyrin domain family member E                  |
| 43,392 | 3 | 719,382 | 2155,125 | -0,004 | -1,644 | 30,05  | AGFAGDDAPRA<br>VFPSIVGRPR |            |           | POTEE_HUMAN | POTE ankyrin domain family member E                  |
| 31,246 | 2 | 488,727 | 975,440  | -0,001 | -1,518 | 88,56  | AGFAGDDAPR                |            |           | POTEF_HUMAN | POTE ankyrin domain family member F                  |
| 40,077 | 2 | 599,855 | 1197,696 | -0,002 | -2,086 | 41,77  | AVFPSIVGRPR               |            |           | POTEF_HUMAN | POTE ankyrin domain                                  |

|        |   |         |          |        |        |        |                           |             |                                        |
|--------|---|---------|----------|--------|--------|--------|---------------------------|-------------|----------------------------------------|
| 40,077 | 3 | 400,241 | 1197,701 | 0,003  | 2,297  | 33,51  | AVFPSIVGRPR               | POTEF_HUMAN | family member F                        |
| 45,436 | 2 | 895,949 | 1789,884 | -0,001 | -0,339 | 122,91 | SYELPDGQVITIG<br>NER      | POTEF_HUMAN | POTE ankyrin domain<br>family member F |
| 44,400 | 2 | 895,949 | 1789,884 | -0,001 | -0,313 | 28,06  | SYELPDGQVITIG<br>NER      | POTEF_HUMAN | POTE ankyrin domain<br>family member F |
| 43,392 | 3 | 719,382 | 2155,125 | -0,004 | -1,644 | 30,05  | AGFAGDDAPRA<br>VFPSIVGRPR | POTEF_HUMAN | POTE ankyrin domain<br>family member F |
| 31,246 | 2 | 488,727 | 975,440  | -0,001 | -1,518 | 88,56  | AGFAGDDAPR                | POTEI_HUMAN | POTE ankyrin domain<br>family member I |
| 40,077 | 2 | 599,855 | 1197,696 | -0,002 | -2,086 | 41,77  | AVFPSIVGRPR               | POTEI_HUMAN | POTE ankyrin domain<br>family member I |
| 40,077 | 3 | 400,241 | 1197,701 | 0,003  | 2,297  | 33,51  | AVFPSIVGRPR               | POTEI_HUMAN | POTE ankyrin domain<br>family member I |
| 43,392 | 3 | 656,697 | 1967,070 | -0,002 | -1,235 | 25,89  | VAPEEHPILLTEA<br>PLNPK    | POTEI_HUMAN | POTE ankyrin domain<br>family member I |
| 43,392 | 3 | 719,382 | 2155,125 | -0,004 | -1,644 | 30,05  | AGFAGDDAPRA<br>VFPSIVGRPR | POTEI_HUMAN | POTE ankyrin domain<br>family member I |
| 31,246 | 2 | 488,727 | 975,440  | -0,001 | -1,518 | 88,56  | AGFAGDDAPR                | POTEJ_HUMAN | POTE ankyrin domain<br>family member J |
| 43,392 | 3 | 656,697 | 1967,070 | -0,002 | -1,235 | 25,89  | VAPEEHPILLTEA<br>PLNPK    | POTEJ_HUMAN | POTE ankyrin domain<br>family member J |
| 38,823 | 2 | 783,879 | 1565,743 | -0,001 | -0,569 | 43,84  | SVGGSGGGSFGD<br>NLVTR     | LMNA_HUMAN  | Prelamin-A /C                          |
| 48,770 | 2 | 532,797 | 1063,580 | -0,002 | -1,829 | 34,4   | SFPNLAFIR                 | PRELP_HUMAN | Prolargin                              |

|        |   |         |          |        |         |        |                        |            |           |             |                                                                      |
|--------|---|---------|----------|--------|---------|--------|------------------------|------------|-----------|-------------|----------------------------------------------------------------------|
| 44,464 | 2 | 783,432 | 1564,849 | -0,002 | -1,272  | 29,41  | NLMQLNLAHNI<br>LR      | [3]<br>(M) | Oxidation | PRELP_HUMAN | Prolargin                                                            |
| 43,392 | 2 | 511,268 | 1020,522 | -0,002 | -1,822  | 56,34  | ETLLQDFR               |            |           | AMBP_HUMAN  | Protein AMBP                                                         |
| 39,470 | 2 | 890,920 | 1779,825 | -0,003 | -1,405  | 51,42  | VDATEESDLAQQ<br>YGVR   |            |           | PDIA1_HUMAN | Protein disulfide-<br>isomerase                                      |
| 42,087 | 2 | 500,805 | 999,595  | -0,002 | -1,885  | 31,1   | DNALTLLIK              |            |           | UN45A_HUMAN | Protein unc-45<br>homolog A                                          |
| 45,436 | 2 | 895,949 | 1789,884 | -0,001 | -0,339  | 122,91 | SYELPDGQVITIG<br>NER   |            |           | ACTBM_HUMAN | Putative beta-actin-<br>like protein 3                               |
| 44,400 | 2 | 895,949 | 1789,884 | -0,001 | -0,313  | 28,06  | SYELPDGQVITIG<br>NER   |            |           | ACTBM_HUMAN | Putative beta-actin-<br>like protein 3                               |
| 43,392 | 3 | 656,697 | 1967,070 | -0,002 | -1,235  | 25,89  | VAPEEHPILLTEA<br>PLNPK |            |           | ACTBM_HUMAN | Putative beta-actin-<br>like protein 3                               |
| 42,343 | 2 | 645,346 | 1288,677 | -0,001 | -0,658  | 40,73  | SGPFAPVLSATSR          |            |           | UCRIL_HUMAN | Putative cytochrome<br>b-c1 complex subunit<br>Rieske-like protein 1 |
| 55,923 | 2 | 731,381 | 1460,747 | -0,015 | -10,262 | 27,91  | ISPEEVYNNLKR           |            |           | NSUN7_HUMAN | Putative<br>methyltransferase<br>NSUN7                               |
| 33,266 | 2 | 358,208 | 714,402  | 0,000  | 0,057   | 26,36  | DIAAAVR                |            |           | OR1F2_HUMAN | Putative olfactory<br>receptor 1F2                                   |
| 30,670 | 2 | 420,737 | 839,460  | -0,012 | -14,823 | 26,42  | RLNNAPR                |            |           | SHSA8_HUMAN | Putative protein shisa-<br>8                                         |
| 42,310 | 2 | 566,307 | 1130,599 | -0,001 | -1,083  | 55,59  | MELQEIQLK              |            |           | TPM3L_HUMAN | Putative tropomyosin<br>alpha-3 chain-like<br>protein                |

|        |   |              |          |        |         |       |                                      |            |           |             |                                                            |
|--------|---|--------------|----------|--------|---------|-------|--------------------------------------|------------|-----------|-------------|------------------------------------------------------------|
| 39,025 | 2 | 574,304      | 1146,594 | -0,002 | -1,399  | 32,25 | MELQEIQLK                            | [1]<br>(M) | Oxidation | TPM3L_HUMAN | Putative tropomyosin<br>alpha-3 chain-like<br>protein      |
| 48,933 | 3 | 1006,53<br>5 | 3016,583 | -0,004 | -1,297  | 28,54 | TATESFASDPILY<br>RPVAVALDTKGP<br>EIR |            |           | KPYM_HUMAN  | Pyruvate kinase PKM                                        |
| 48,933 | 4 | 755,154      | 3016,586 | -0,001 | -0,411  | 35,81 | TATESFASDPILY<br>RPVAVALDTKGP<br>EIR |            |           | KPYM_HUMAN  | Pyruvate kinase PKM                                        |
| 40,782 | 2 | 581,312      | 1160,609 | -0,013 | -11,367 | 30,51 | MGSPGASLGIKK                         | [1]<br>(M) | Oxidation | APRV1_HUMAN | Retroviral-like<br>aspartic protease 1                     |
| 32,835 | 2 | 476,717      | 951,420  | -0,006 | -6,383  | 31,68 | SSEDSGSRK                            |            |           | RHG21_HUMAN | Rho GTPase-<br>activating protein 21                       |
| 46,782 | 3 | 558,657      | 1672,949 | 0,009  | 5,580   | 26,23 | LEPEAPALALPV<br>TPQK                 |            |           | RPAP1_HUMAN | RNA polymerase II-<br>associated protein 1                 |
| 40,618 | 2 | 661,376      | 1320,737 | -0,003 | -2,169  | 51,46 | DEILLHQAAAK                          |            |           | SLMAP_HUMAN | Sarcolemmal<br>membrane-associated<br>protein              |
| 35,916 | 2 | 696,362      | 1390,710 | -0,002 | -1,781  | 25,9  | AEIGIAMGSGTA<br>VAK                  | [7]<br>(M) | Oxidation | AT2A2_HUMAN | Sarcoplasmic/endopla<br>smic reticulum<br>calcium ATPase 2 |
| 29,729 | 2 | 373,711      | 745,407  | 0,010  | 13,820  | 27,32 | IEDGKGK                              |            |           | SEM3B_HUMAN | Semaphorin-3B                                              |
| 39,194 | 2 | 564,852      | 1127,690 | -0,001 | -0,925  | 30,84 | KQTALVELVK                           |            |           | ALBU_HUMAN  | Serum albumin                                              |
| 41,747 | 2 | 382,726      | 763,438  | 0,000  | 0,249   | 26,01 | VFVFPR                               |            |           | SAMP_HUMAN  | Serum amyloid P-<br>component                              |
| 41,211 | 2 | 578,803      | 1155,592 | -0,001 | -0,702  | 87,06 | VGEYSLYIGR                           |            |           | SAMP_HUMAN  | Serum amyloid P-                                           |

|        |   |              |          |        |         |       |                          |                       |                                                                                      |
|--------|---|--------------|----------|--------|---------|-------|--------------------------|-----------------------|--------------------------------------------------------------------------------------|
| 36,247 | 2 | 583,795      | 1165,575 | -0,002 | -1,556  | 40,92 | QGYFVEAQPK               | SAMP_HUMAN            | component<br>Serum amyloid P-<br>component                                           |
| 39,248 | 2 | 889,439      | 1776,864 | 0,000  | -0,113  | 33,2  | SDGDPVQPAVL<br>QVHQTS    | SDPR_HUMAN            | Serum deprivation-<br>response protein                                               |
| 36,849 | 3 | 388,900      | 1163,678 | -0,011 | -9,209  | 27,79 | SLNRVHLLGR               | SSBP_HUMAN            | Single-stranded DNA-<br>binding protein,<br>mitochondrial                            |
| 37,063 | 2 | 537,282      | 1072,550 | -0,002 | -1,508  | 37,71 | SLQQLAEEER               | SPTN1_HUMAN           | Spectrin alpha chain,<br>non-erythrocytic 1                                          |
| 41,180 | 2 | 554,797      | 1107,579 | -0,002 | -1,924  | 32,94 | ITALDEFATK               | SPTN1_HUMAN           | Spectrin alpha chain,<br>non-erythrocytic 1                                          |
| 46,103 | 2 | 602,842      | 1203,670 | -0,002 | -1,298  | 36,66 | DLSSVQTLLTK              | SPTN1_HUMAN           | Spectrin alpha chain,<br>non-erythrocytic 1                                          |
| 55,387 | 3 | 658,026      | 1971,056 | -0,002 | -1,111  | 48,63 | IAALQAFADQLI<br>AAGHYAK  | SPTN1_HUMAN           | Spectrin alpha chain,<br>non-erythrocytic 1                                          |
| 35,312 | 2 | 485,295      | 968,574  | -0,002 | -2,325  | 35,54 | VAVVNQIAR                | SPTB2_HUMAN           | Spectrin beta chain,<br>non-erythrocytic 1                                           |
| 35,781 | 2 | 450,281      | 898,547  | -0,013 | -14,584 | 25,53 | AAVVALSLR                | DHSB_HUMAN            | Succinate<br>dehydrogenase<br>[ubiquinone] iron-<br>sulfur subunit,<br>mitochondrial |
| 57,912 | 2 | 1084,08<br>8 | 2166,162 | 0,000  | -0,182  | 41,35 | APPPIAYNPLLSP<br>FFPQAAR | SYP2L_HUMAN           | Synaptopodin 2-like<br>protein                                                       |
| 31,451 | 3 | 914,448      | 2740,323 | 0,014  | 5,103   | 27,53 | MSQVMSSPLLAG [1]         | Oxidation TENS4_HUMAN | Tensin-4                                                                             |

|        |   |         |          |        |        |       | GHAVSLAPCDEP (M)   [5] |                   |             |                           |
|--------|---|---------|----------|--------|--------|-------|------------------------|-------------------|-------------|---------------------------|
|        |   |         |          |        |        |       | RR                     | Oxidation (M)     |             |                           |
| 41,992 | 2 | 448,302 | 894,589  | -0,001 | -0,924 | 27,47 | VLGVPVIAK              |                   | TITIN_HUMAN | Titin                     |
| 42,051 | 2 | 474,761 | 947,507  | -0,001 | -0,733 | 27,55 | SVFPELTR               |                   | TITIN_HUMAN | Titin                     |
| 40,726 | 2 | 476,800 | 951,585  | -0,001 | -1,489 | 25,75 | QLGVPVIAR              |                   | TITIN_HUMAN | Titin                     |
| 44,993 | 3 | 434,918 | 1301,733 | -0,001 | -1,121 | 29,55 | SLRFPLALEEK            |                   | TITIN_HUMAN | Titin                     |
| 47,852 | 2 | 658,366 | 1314,717 | -0,001 | -0,857 | 29,24 | AGEDVQVLIPFK           |                   | TITIN_HUMAN | Titin                     |
| 48,481 | 3 | 587,329 | 1758,965 | -0,002 | -1,085 | 26,1  | LILTEGKNPPFFD          |                   | TITIN_HUMAN | Titin                     |
|        |   |         |          |        |        |       | IR                     |                   |             |                           |
| 42,468 | 3 | 694,699 | 2081,074 | -0,001 | -0,538 | 37,1  | RSDTGLYTITAV           |                   | TITIN_HUMAN | Titin                     |
|        |   |         |          |        |        |       | NNLGTASK               |                   |             |                           |
| 46,003 | 3 | 845,159 | 2532,455 | -0,001 | -0,557 | 28,88 | TIKPPPVEPEPTPI         |                   | TITIN_HUMAN | Titin                     |
|        |   |         |          |        |        |       | AAPVTVPVVGK            |                   |             |                           |
| 46,384 | 2 | 608,347 | 1214,680 | -0,001 | -0,790 | 34,59 | TLMNLGGLAVA            |                   | TAGL2_HUMAN | Transgelin-2              |
|        |   |         |          |        |        |       | R                      |                   |             |                           |
| 49,382 | 2 | 801,948 | 1601,881 | -0,001 | -0,381 | 31,2  | VVLAYEPVWAIG           |                   | TPIS_HUMAN  | Triosephosphate isomerase |
|        |   |         |          |        |        |       | TGK                    |                   |             |                           |
| 30,567 | 2 | 438,227 | 874,439  | 0,000  | -0,438 | 30,27 | SLEAQAEK               |                   | TPM1_HUMAN  | Tropomyosin alpha-1 chain |
| 42,310 | 2 | 566,307 | 1130,599 | -0,001 | -1,083 | 55,59 | MEIQEIQLK              |                   | TPM1_HUMAN  | Tropomyosin alpha-1 chain |
| 39,025 | 2 | 574,304 | 1146,594 | -0,002 | -1,399 | 32,25 | MEIQEIQLK              | [1] Oxidation (M) | TPM1_HUMAN  | Tropomyosin alpha-1 chain |
| 40,842 | 2 | 657,884 | 1313,754 | -0,001 | -1,010 | 40,4  | KLVIIESDLER            |                   | TPM1_HUMAN  | Tropomyosin alpha-1 chain |
| 40,842 | 3 | 438,925 | 1313,754 | -0,001 | -0,828 | 34,8  | KLVIIESDLER            |                   | TPM1_HUMAN  | Tropomyosin alpha-1       |

|        |   |         |          |        |        |       |                      |             |           |            |       |             |         |
|--------|---|---------|----------|--------|--------|-------|----------------------|-------------|-----------|------------|-------|-------------|---------|
| 35,746 | 2 | 666,822 | 1331,630 | -0,001 | -1,122 | 60,41 | ATDAEADVASL<br>NR    |             |           | TPM1_HUMAN | chain | Tropomyosin | alpha-1 |
| 33,184 | 2 | 730,869 | 1459,724 | -0,003 | -1,913 | 39,4  | KATDAEADVAS<br>LNR   |             |           | TPM1_HUMAN | chain | Tropomyosin | alpha-1 |
| 34,018 | 3 | 496,917 | 1487,729 | -0,004 | -2,443 | 39,43 | ATDAEADVASL<br>NRR   |             |           | TPM1_HUMAN | chain | Tropomyosin | alpha-1 |
| 33,413 | 3 | 496,917 | 1487,730 | -0,003 | -2,140 | 27,75 | ATDAEADVASL<br>NRR   |             |           | TPM1_HUMAN | chain | Tropomyosin | alpha-1 |
| 40,921 | 2 | 758,913 | 1515,812 | -0,002 | -1,407 | 27,34 | SKQLEDELVSLQ<br>K    |             |           | TPM1_HUMAN | chain | Tropomyosin | alpha-1 |
| 45,315 | 2 | 887,911 | 1773,808 | -0,001 | -0,440 | 47,73 | AISEELDHALND<br>MTSI | [13]<br>(M) | Oxidation | TPM1_HUMAN | chain | Tropomyosin | alpha-1 |
| 30,567 | 2 | 438,227 | 874,439  | 0,000  | -0,438 | 30,27 | SLEAQAEK             |             |           | TPM3_HUMAN | chain | Tropomyosin | alpha-3 |
| 42,310 | 2 | 566,307 | 1130,599 | -0,001 | -1,083 | 55,59 | MELQEIQLK            |             |           | TPM3_HUMAN | chain | Tropomyosin | alpha-3 |
| 39,025 | 2 | 574,304 | 1146,594 | -0,002 | -1,399 | 32,25 | MELQEIQLK            | [1]<br>(M)  | Oxidation | TPM3_HUMAN | chain | Tropomyosin | alpha-3 |
| 45,315 | 2 | 887,911 | 1773,808 | -0,001 | -0,440 | 47,73 | AISEELDHALND<br>MTSI | [13]<br>(M) | Oxidation | TPM3_HUMAN | chain | Tropomyosin | alpha-3 |
| 35,746 | 2 | 666,822 | 1331,630 | -0,001 | -1,122 | 60,41 | ATDAEADVASL<br>NR    |             |           | TPM2_HUMAN | chain | Tropomyosin | beta    |
| 33,184 | 2 | 730,869 | 1459,724 | -0,003 | -1,913 | 39,4  | KATDAEADVAS<br>LNR   |             |           | TPM2_HUMAN | chain | Tropomyosin | beta    |
| 34,018 | 3 | 496,917 | 1487,729 | -0,004 | -2,443 | 39,43 | ATDAEADVASL          |             |           | TPM2_HUMAN | chain | Tropomyosin | beta    |



|        |   |         |          |        |        |       |                      |                                   |           |             |                      |                |
|--------|---|---------|----------|--------|--------|-------|----------------------|-----------------------------------|-----------|-------------|----------------------|----------------|
| 33,413 | 3 | 496,917 | 1487,730 | -0,003 | -2,140 | 27,75 | NRR<br>ATDAEADVASL   |                                   |           | TPM2_HUMAN  | chain<br>Tropomyosin | beta           |
|        |   |         |          |        |        |       | NRR                  |                                   |           |             | chain                |                |
| 38,823 | 2 | 581,779 | 1161,544 | -0,001 | -0,624 | 90,23 | NIDALSGMEGR          |                                   |           | TNNI3_HUMAN | Troponin I,          | cardiac muscle |
| 33,111 | 2 | 589,778 | 1177,542 | 0,003  | 2,263  | 61,87 | NIDALSGMEGR          | [8]<br>(M)                        | Oxidation | TNNI3_HUMAN | Troponin I,          | cardiac muscle |
| 31,314 | 2 | 653,823 | 1305,631 | -0,003 | -2,476 | 44,38 | KNIDALSGMEGR         | [9]<br>(M)                        | Oxidation | TNNI3_HUMAN | Troponin I,          | cardiac muscle |
| 54,238 | 2 | 724,373 | 1446,732 | -0,001 | -0,363 | 86,95 | ISADAMMQALL<br>GAR   |                                   |           | TNNI3_HUMAN | Troponin I,          | cardiac muscle |
| 45,625 | 2 | 732,370 | 1462,726 | -0,001 | -0,893 | 65,86 | ISADAMMQALL<br>GAR   | [6]<br>(M)                        | Oxidation | TNNI3_HUMAN | Troponin I,          | cardiac muscle |
| 45,625 | 2 | 732,370 | 1462,726 | -0,001 | -0,893 | 86,92 | ISADAMMQALL<br>GAR   | [7]<br>(M)                        | Oxidation | TNNI3_HUMAN | Troponin I,          | cardiac muscle |
| 38,339 | 2 | 740,367 | 1478,720 | -0,002 | -1,159 | 42,27 | ISADAMMQALL<br>GAR   | [6]<br>(M)   [7]<br>Oxidation (M) | Oxidation | TNNI3_HUMAN | Troponin I,          | cardiac muscle |
| 59,363 | 3 | 630,682 | 1889,024 | -0,002 | -0,995 | 44,46 | NITEIADLTQKIF<br>DLR |                                   |           | TNNI3_HUMAN | Troponin I,          | cardiac muscle |
| 30,670 | 2 | 379,237 | 756,460  | -0,001 | -0,764 | 35,39 | ILAERR               |                                   |           | TNNT2_HUMAN | Troponin T,          | cardiac muscle |
| 40,301 | 2 | 453,755 | 905,495  | -0,002 | -2,425 | 26,65 | YEINVLR              |                                   |           | TNNT2_HUMAN | Troponin T,          | cardiac muscle |
| 35,810 | 2 | 508,742 | 1015,470 | -0,002 | -2,422 | 32,31 | VDFDDIHR             |                                   |           | TNNT2_HUMAN | Troponin T,          | cardiac muscle |

|        |   |         |          |        |        |       |                          |            |           |             |                                  |
|--------|---|---------|----------|--------|--------|-------|--------------------------|------------|-----------|-------------|----------------------------------|
| 35,810 | 3 | 339,498 | 1015,473 | 0,000  | 0,289  | 25,44 | VDFDDIHR                 |            |           | TNNT2_HUMAN | Troponin T, cardiac muscle       |
| 39,499 | 2 | 806,884 | 1611,753 | -0,001 | -0,572 | 36,11 | ALSNMMHFGGY<br>IQK       | [5]<br>(M) | Oxidation | TNNT2_HUMAN | Troponin T, cardiac muscle       |
| 46,168 | 3 | 599,650 | 1795,928 | -0,001 | -0,796 | 29,11 | SFMPNLVPPKIP<br>DGER     |            |           | TNNT2_HUMAN | Troponin T, cardiac muscle       |
| 42,726 | 3 | 604,981 | 1811,922 | -0,002 | -1,330 | 35,6  | SFMPNLVPPKIP<br>DGER     | [3]<br>(M) | Oxidation | TNNT2_HUMAN | Troponin T, cardiac muscle       |
| 54,459 | 3 | 637,990 | 1910,947 | -0,002 | -0,859 | 60,09 | DLNELQALIEAH<br>FENR     |            |           | TNNT2_HUMAN | Troponin T, cardiac muscle       |
| 54,459 | 2 | 956,481 | 1910,948 | -0,001 | -0,567 | 40,28 | DLNELQALIEAH<br>FENR     |            |           | TNNT2_HUMAN | Troponin T, cardiac muscle       |
| 50,982 | 4 | 575,788 | 2299,125 | -0,002 | -0,822 | 37,69 | MEKDLNELQALI<br>EAHFENR  |            |           | TNNT2_HUMAN | Troponin T, cardiac muscle       |
| 50,029 | 4 | 579,787 | 2315,119 | -0,003 | -1,222 | 38,14 | MEKDLNELQALI<br>EAHFENR  | [1]<br>(M) | Oxidation | TNNT2_HUMAN | Troponin T, cardiac muscle       |
| 50,029 | 3 | 772,714 | 2315,120 | -0,001 | -0,599 | 28,08 | MEKDLNELQALI<br>EAHFENR  | [1]<br>(M) | Oxidation | TNNT2_HUMAN | Troponin T, cardiac muscle       |
| 35,810 | 2 | 508,742 | 1015,470 | -0,002 | -2,422 | 32,31 | VDFDDIHR                 |            |           | TNNT1_HUMAN | Troponin T, slow skeletal muscle |
| 35,810 | 3 | 339,498 | 1015,473 | 0,000  | 0,289  | 25,44 | VDFDDIHR                 |            |           | TNNT1_HUMAN | Troponin T, slow skeletal muscle |
| 50,313 | 2 | 851,456 | 1700,897 | -0,001 | -0,657 | 64,18 | AVFVDLEPTVID<br>EVR      |            |           | TBA1A_HUMAN | Tubulin alpha-1A chain           |
| 49,552 | 3 | 760,734 | 2279,180 | 0,001  | 0,251  | 27,69 | AVFVDLEPTVID<br>EVRTGTYR |            |           | TBA1A_HUMAN | Tubulin alpha-1A chain           |

|        |   |         |          |        |        |       |                                    |             |           |             |                              |
|--------|---|---------|----------|--------|--------|-------|------------------------------------|-------------|-----------|-------------|------------------------------|
| 52,349 | 2 | 858,464 | 1714,914 | 0,000  | -0,166 | 40,92 | AVFVDLEPTVID<br>EIR                |             |           | TBA4A_HUMAN | Tubulin<br>alpha-4A<br>chain |
| 46,003 | 2 | 572,320 | 1142,625 | -0,002 | -1,335 | 28,94 | LAVNMVPFPR                         |             |           | TBB5_HUMAN  | Tubulin beta chain           |
| 42,114 | 2 | 580,317 | 1158,620 | -0,002 | -1,633 | 30,95 | LAVNMVPFPR                         | [5]<br>(M)  | Oxidation | TBB5_HUMAN  | Tubulin beta chain           |
| 42,726 | 2 | 660,354 | 1318,694 | -0,002 | -1,315 | 49,82 | IMNTFSVVPSPK                       |             |           | TBB5_HUMAN  | Tubulin beta chain           |
| 50,866 | 3 | 540,949 | 1619,826 | -0,002 | -1,416 | 34,82 | LHFFMPGFAPLT<br>SR                 |             |           | TBB5_HUMAN  | Tubulin beta chain           |
| 44,499 | 2 | 816,419 | 1630,823 | -0,001 | -0,551 | 39,61 | AILVDLEPGTMD<br>SVR                | [11]<br>(M) | Oxidation | TBB5_HUMAN  | Tubulin beta chain           |
| 49,998 | 2 | 830,450 | 1658,886 | -0,002 | -1,119 | 41,96 | ALTVPELTQQVF<br>DAK                |             |           | TBB5_HUMAN  | Tubulin beta chain           |
| 50,639 | 3 | 696,363 | 2086,068 | -0,002 | -0,897 | 54,68 | GHYTEGAELVDS<br>VLDVVRK            |             |           | TBB5_HUMAN  | Tubulin beta chain           |
| 51,567 | 3 | 933,453 | 2797,336 | 0,000  | -0,069 | 75,79 | SGPFGQIFRPDNF<br>VFGQSGAGNNW<br>AK |             |           | TBB5_HUMAN  | Tubulin beta chain           |
| 46,003 | 2 | 572,320 | 1142,625 | -0,002 | -1,335 | 28,94 | LAVNMVPFPR                         |             |           | TBB1_HUMAN  | Tubulin beta-1 chain         |
| 42,114 | 2 | 580,317 | 1158,620 | -0,002 | -1,633 | 30,95 | LAVNMVPFPR                         | [5]<br>(M)  | Oxidation | TBB1_HUMAN  | Tubulin beta-1 chain         |
| 47,387 | 2 | 808,421 | 1614,828 | -0,001 | -0,575 | 35,86 | AVLVDLEPGTM<br>DSIR                |             |           | TBB1_HUMAN  | Tubulin beta-1 chain         |
| 46,003 | 2 | 572,320 | 1142,625 | -0,002 | -1,335 | 28,94 | LAVNMVPFPR                         |             |           | TBB3_HUMAN  | Tubulin beta-3 chain         |
| 42,114 | 2 | 580,317 | 1158,620 | -0,002 | -1,633 | 30,95 | LAVNMVPFPR                         | [5]<br>(M)  | Oxidation | TBB3_HUMAN  | Tubulin beta-3 chain         |
| 42,726 | 2 | 660,354 | 1318,694 | -0,002 | -1,315 | 49,82 | IMNTFSVVPSPK                       |             |           | TBB3_HUMAN  | Tubulin beta-3 chain         |

|        |   |         |          |        |        |       |                                    |             |           |             |                       |
|--------|---|---------|----------|--------|--------|-------|------------------------------------|-------------|-----------|-------------|-----------------------|
| 44,499 | 2 | 816,419 | 1630,823 | -0,001 | -0,551 | 39,61 | AILVDLEPGTMD<br>SVR                | [11]<br>(M) | Oxidation | TBB3_HUMAN  | Tubulin beta-3 chain  |
| 50,639 | 3 | 696,363 | 2086,068 | -0,002 | -0,897 | 54,68 | GHYTEGAELVDS<br>VLDVVRK            |             |           | TBB3_HUMAN  | Tubulin beta-3 chain  |
| 46,003 | 2 | 572,320 | 1142,625 | -0,002 | -1,335 | 28,94 | LAVNMVPFPR                         |             |           | TBB4B_HUMAN | Tubulin beta-4B chain |
| 42,114 | 2 | 580,317 | 1158,620 | -0,002 | -1,633 | 30,95 | LAVNMVPFPR                         | [5]<br>(M)  | Oxidation | TBB4B_HUMAN | Tubulin beta-4B chain |
| 42,726 | 2 | 660,354 | 1318,694 | -0,002 | -1,315 | 49,82 | IMNTFSVVPSPK                       |             |           | TBB4B_HUMAN | Tubulin beta-4B chain |
| 45,668 | 2 | 801,413 | 1600,812 | -0,001 | -0,724 | 30,14 | AVLVDLEPGTM<br>DSVR                |             |           | TBB4B_HUMAN | Tubulin beta-4B chain |
| 42,836 | 2 | 809,411 | 1616,807 | -0,001 | -0,833 | 31,95 | AVLVDLEPGTM<br>DSVR                | [11]<br>(M) | Oxidation | TBB4B_HUMAN | Tubulin beta-4B chain |
| 50,866 | 3 | 540,949 | 1619,826 | -0,002 | -1,416 | 34,82 | LHFFMPGFAPLT<br>SR                 |             |           | TBB4B_HUMAN | Tubulin beta-4B chain |
| 50,639 | 3 | 696,363 | 2086,068 | -0,002 | -0,897 | 54,68 | GHYTEGAELVDS<br>VLDVVRK            |             |           | TBB4B_HUMAN | Tubulin beta-4B chain |
| 51,567 | 3 | 933,453 | 2797,336 | 0,000  | -0,069 | 75,79 | SGPFGQIFRPDNF<br>VFGQSGAGNNW<br>AK |             |           | TBB4B_HUMAN | Tubulin beta-4B chain |
| 46,003 | 2 | 572,320 | 1142,625 | -0,002 | -1,335 | 28,94 | LAVNMVPFPR                         |             |           | TBB6_HUMAN  | Tubulin beta-6 chain  |
| 42,114 | 2 | 580,317 | 1158,620 | -0,002 | -1,633 | 30,95 | LAVNMVPFPR                         | [5]<br>(M)  | Oxidation | TBB6_HUMAN  | Tubulin beta-6 chain  |
| 50,866 | 3 | 540,949 | 1619,826 | -0,002 | -1,416 | 34,82 | LHFFMPGFAPLT<br>SR                 |             |           | TBB6_HUMAN  | Tubulin beta-6 chain  |
| 46,003 | 2 | 572,320 | 1142,625 | -0,002 | -1,335 | 28,94 | LAVNMVPFPR                         |             |           | TBB8_HUMAN  | Tubulin beta-8 chain  |
| 42,114 | 2 | 580,317 | 1158,620 | -0,002 | -1,633 | 30,95 | LAVNMVPFPR                         | [5]         | Oxidation | TBB8_HUMAN  | Tubulin beta-8 chain  |

|        |   |         |          |        |        |       |                          |                                     |           |             |                                                               |
|--------|---|---------|----------|--------|--------|-------|--------------------------|-------------------------------------|-----------|-------------|---------------------------------------------------------------|
| 45,668 | 2 | 801,413 | 1600,812 | -0,001 | -0,724 | 30,14 | AVLVLDLEPGTM<br>DSVR     | (M)                                 |           | TBB8_HUMAN  | Tubulin beta-8 chain                                          |
| 42,836 | 2 | 809,411 | 1616,807 | -0,001 | -0,833 | 31,95 | AVLVLDLEPGTM<br>DSVR     | [11]<br>(M)                         | Oxidation | TBB8_HUMAN  | Tubulin beta-8 chain                                          |
| 50,866 | 3 | 540,949 | 1619,826 | -0,002 | -1,416 | 34,82 | LHFFMPGFAPLT<br>SR       |                                     |           | TBB8_HUMAN  | Tubulin beta-8 chain                                          |
| 39,218 | 2 | 660,858 | 1319,702 | -0,002 | -1,688 | 38,4  | TSAALSTVGSAIS<br>R       |                                     |           | TPD54_HUMAN | Tumor protein D54                                             |
| 42,996 | 2 | 573,314 | 1144,614 | 0,017  | 14,789 | 26,11 | EEEKLELQK                |                                     |           | U520_HUMAN  | U5 small nuclear<br>ribonucleoprotein 200<br>kDa helicase     |
| 41,992 | 2 | 448,302 | 894,589  | -0,001 | -0,924 | 34,35 | VLGVLPGIK                |                                     |           | ADCK2_HUMAN | Uncharacterized aarF<br>domain-containing<br>protein kinase 2 |
| 44,537 | 4 | 543,014 | 2168,028 | 0,012  | 5,425  | 25,4  | DGVADSTVISSM<br>PCLLMELR | [12]<br>(M)   [17]<br>Oxidation (M) | Oxidation | CR025_HUMAN | Uncharacterized<br>protein C18orf25                           |
| 29,729 | 2 | 373,711 | 745,407  | -0,001 | -1,206 | 28,11 | QGTQGKK                  |                                     |           | YA044_HUMAN | Uncharacterized<br>protein<br>ENSP00000471857                 |
| 42,836 | 2 | 538,755 | 1075,495 | -0,002 | -1,911 | 27,12 | DNLAEDIMR                |                                     |           | VIME_HUMAN  | Vimentin                                                      |
| 35,359 | 2 | 547,266 | 1092,518 | -0,002 | -2,020 | 72,12 | FADLSEAANR               |                                     |           | VIME_HUMAN  | Vimentin                                                      |
| 36,120 | 2 | 635,783 | 1269,552 | -0,003 | -2,049 | 37,39 | LGDLYEEEMR               | [9]<br>(M)                          | Oxidation | VIME_HUMAN  | Vimentin                                                      |
| 39,888 | 2 | 655,306 | 1308,597 | -0,001 | -1,082 | 49,06 | NLQEAEWYK                |                                     |           | VIME_HUMAN  | Vimentin                                                      |

|        |   |              |          |        |        |       |                            |             |                                                           |
|--------|---|--------------|----------|--------|--------|-------|----------------------------|-------------|-----------------------------------------------------------|
| 37,177 | 2 | 714,859      | 1427,704 | -0,001 | -0,664 | 40,41 | SLYASSPGGVYA<br>TR         | VIME_HUMAN  | Vimentin                                                  |
| 55,504 | 2 | 785,951      | 1569,887 | -0,001 | -0,721 | 59,68 | ISLPLPNFSSLNL<br>R         | VIME_HUMAN  | Vimentin                                                  |
| 54,933 | 2 | 1063,53<br>5 | 2125,056 | -0,002 | -0,891 | 46,56 | LLQDSVDFSLAD<br>AINTEFK    | VIME_HUMAN  | Vimentin                                                  |
| 52,966 | 3 | 833,090      | 2496,249 | 0,000  | -0,171 | 42,86 | LLQDSVDFSLAD<br>AINTEFKNTR | VIME_HUMAN  | Vimentin                                                  |
| 34,575 | 2 | 406,789      | 811,564  | -0,001 | -0,766 | 32,64 | ILLVAKR                    | VINC_HUMAN  | Vinculin                                                  |
| 70,071 | 3 | 692,731      | 2075,172 | -0,001 | -0,685 | 27,07 | AIPDLTAPVAAV<br>QAAVSNLVR  | VINC_HUMAN  | Vinculin                                                  |
| 39,591 | 3 | 501,949      | 1502,825 | -0,003 | -1,686 | 25,29 | IYISGMAPRPSLA<br>K         | VTNC_HUMAN  | Vitronectin                                               |
| 35,174 | 2 | 470,735      | 939,455  | -0,002 | -1,649 | 32,32 | NNFAVGYR                   | VDAC2_HUMAN | Voltage-dependent<br>anion-selective<br>channel protein 2 |

**Supplementary Table S3.** List of peptides and their corresponding proteins in all tissue sections identified by MALDI IMS assigned to nano LC-MS (LCMS-MALDI-MSI-match)

| MALDI-<br>MSI<br>value<br>[Da] | ROC [AUC]<br>Adventitia<br>AAA<br>vs.<br>EVAR | ROC<br>[AUC]<br>Adventitia<br>AAA<br>vs.<br>TAA | ROC [AUC]<br>Adventitia<br>EVAR<br>vs.<br>TAA | ROC<br>[AUC]<br>Media<br>AAA<br>vs.<br>EVAR | ROC<br>[AUC]<br>Media<br>AAA<br>vs.<br>TAA | ROC<br>[AUC]<br>Media<br>EVAR<br>vs.<br>TAA | LC-MS<br>[MH+Calc.] | Scores | Sequence | Gene Symbol | Protein                                 |
|--------------------------------|-----------------------------------------------|-------------------------------------------------|-----------------------------------------------|---------------------------------------------|--------------------------------------------|---------------------------------------------|---------------------|--------|----------|-------------|-----------------------------------------|
| 644,40                         | 0,49                                          | 0,41                                            | 0,41                                          | 0,58                                        | 0,42                                       | 0,33                                        | 643,41              | 33,20  | AQIALK   | MDHC_HUMAN  | Malate<br>dehydrogenase,<br>cytoplasmic |
| 645,40                         | 0,49                                          | 0,42                                            | 0,41                                          | 0,57                                        | 0,42                                       | 0,34                                        |                     |        |          |             |                                         |
| 678,40                         | 0,44                                          | 0,37                                            | 0,41                                          | 0,57                                        | 0,43                                       | 0,34                                        |                     |        |          |             |                                         |
| 679,40                         | 0,46                                          | 0,40                                            | 0,41                                          | 0,55                                        | 0,46                                       | 0,38                                        |                     |        |          |             |                                         |
| 688,40                         | 0,51                                          | 0,51                                            | 0,48                                          | 0,61                                        | 0,44                                       | 0,33                                        | 688,43              | 27,64  | KQLATK   | H31T_HUMAN  | Histone H3.1t                           |
| 700,40                         | 0,51                                          | 0,47                                            | 0,46                                          | 0,55                                        | 0,44                                       | 0,39                                        |                     |        |          |             |                                         |
| 701,41                         | 0,49                                          | 0,47                                            | 0,48                                          | 0,55                                        | 0,38                                       | 0,33                                        |                     |        |          |             |                                         |
| 730,41                         | 0,50                                          | 0,43                                            | 0,42                                          | 0,58                                        | 0,40                                       | 0,32                                        |                     |        |          |             |                                         |
| 758,41                         | 0,50                                          | 0,45                                            | 0,46                                          | 0,55                                        | 0,45                                       | 0,40                                        | 757,47              | 35,39  | ILAERR   | TNNT2_HUMAN | Troponin T, cardiac<br>muscle           |
| 771,41                         | 0,52                                          | 0,44                                            | 0,41                                          | 0,57                                        | 0,45                                       | 0,36                                        |                     |        |          |             |                                         |
| 784,41                         | 0,51                                          | 0,46                                            | 0,45                                          | 0,58                                        | 0,45                                       | 0,37                                        | 785,39              | 48,12  | GDQGPVGR | CO1A2_HUMAN | Collagen alpha-2(I)<br>chain            |
| 785,41                         | 0,50                                          | 0,44                                            | 0,42                                          | 0,57                                        | 0,43                                       | 0,35                                        | 785,39              | 48,12  | GDQGPVGR | CO1A2_HUMAN | Collagen alpha-2(I)                     |

|        |      |      |      |      |      |      |        |       |           |             |                                             |
|--------|------|------|------|------|------|------|--------|-------|-----------|-------------|---------------------------------------------|
|        |      |      |      |      |      |      | chain  |       |           |             |                                             |
| 786,41 | 0,50 | 0,45 | 0,44 | 0,55 | 0,44 | 0,38 |        |       |           |             |                                             |
| 795,41 | 0,49 | 0,43 | 0,42 | 0,63 | 0,35 | 0,21 |        |       |           |             |                                             |
| 796,41 | 0,48 | 0,43 | 0,44 | 0,62 | 0,39 | 0,27 |        |       |           |             |                                             |
| 833,42 | 0,48 | 0,49 | 0,51 | 0,59 | 0,40 | 0,31 |        |       |           |             |                                             |
| 836,42 | 0,52 | 0,43 | 0,41 | 0,59 | 0,42 | 0,31 | 836,44 | 49,08 | GPAGPQGPR | CO1A1_HUMAN | Collagen alpha-1(I) chain                   |
| 837,42 | 0,56 | 0,45 | 0,41 | 0,60 | 0,43 | 0,31 | 836,44 | 49,08 | GPAGPQGPR | CO1A1_HUMAN | Collagen alpha-1(I) chain                   |
| 838,42 | 0,50 | 0,44 | 0,44 | 0,57 | 0,45 | 0,38 |        |       |           |             |                                             |
| 840,42 | 0,47 | 0,45 | 0,48 | 0,59 | 0,48 | 0,38 | 840,47 | 26,42 | RLNNAPR   | SHSA8_HUMAN | Putative protein shisa-8                    |
| 841,42 | 0,47 | 0,42 | 0,45 | 0,59 | 0,46 | 0,37 | 840,47 | 26,42 | RLNNAPR   | SHSA8_HUMAN | Putative protein shisa-8                    |
| 842,42 | 0,52 | 0,45 | 0,46 | 0,55 | 0,42 | 0,39 |        |       |           |             |                                             |
| 852,42 | 0,54 | 0,45 | 0,42 | 0,61 | 0,40 | 0,28 | 851,42 | 43,88 | GFSGLDGAK | CO1A1_HUMAN | Collagen alpha-1(I) chain                   |
| 853,42 | 0,52 | 0,43 | 0,42 | 0,61 | 0,40 | 0,27 | 853,52 | 55,31 | LGPLQVAR  | ETFB_HUMAN  | Electron transfer flavoprotein subunit beta |
| 854,42 | 0,51 | 0,43 | 0,41 | 0,60 | 0,42 | 0,32 | 853,52 | 55,31 | LGPLQVAR  | ETFB_HUMAN  | Electron transfer flavoprotein subunit beta |
| 868,42 | 0,50 | 0,42 | 0,43 | 0,59 | 0,42 | 0,31 | 868,43 | 34,63 | GEAGPQGPR | CO1A1_HUMAN | Collagen alpha-1(I) chain                   |
| 869,42 | 0,50 | 0,43 | 0,44 | 0,57 | 0,43 | 0,36 | 868,43 | 34,63 | GEAGPQGPR | CO1A1_HUMAN | Collagen alpha-1(I)                         |



|        |      |      |      |      |      |      |        |       |           |             |                                                                         |
|--------|------|------|------|------|------|------|--------|-------|-----------|-------------|-------------------------------------------------------------------------|
|        |      |      |      |      |      |      |        |       |           |             | chain                                                                   |
| 870,42 | 0,51 | 0,44 | 0,42 | 0,56 | 0,46 | 0,40 |        |       |           |             |                                                                         |
| 872,42 | 0,52 | 0,45 | 0,43 | 0,55 | 0,37 | 0,33 |        |       |           |             |                                                                         |
| 874,42 | 0,48 | 0,43 | 0,45 | 0,59 | 0,42 | 0,32 |        |       |           |             |                                                                         |
| 875,42 | 0,51 | 0,48 | 0,46 | 0,57 | 0,44 | 0,37 | 875,45 | 30,27 | SLEAQAEK  | TPM1_HUMAN  | Tropomyosin alpha-1 chain                                               |
| 886,42 | 0,49 | 0,40 | 0,41 | 0,56 | 0,43 | 0,36 | 886,44 | 47,39 | GSEGPQGVR | CO1A1_HUMAN | Collagen alpha-1(I) chain                                               |
| 887,42 | 0,49 | 0,40 | 0,41 | 0,55 | 0,45 | 0,38 | 886,44 | 47,39 | GSEGPQGVR | CO1A1_HUMAN | Collagen alpha-1(I) chain                                               |
| 890,42 | 0,54 | 0,49 | 0,45 | 0,57 | 0,39 | 0,30 |        |       |           |             |                                                                         |
| 891,42 | 0,54 | 0,51 | 0,48 | 0,56 | 0,42 | 0,35 |        |       |           |             |                                                                         |
| 899,42 | 0,54 | 0,47 | 0,42 | 0,56 | 0,46 | 0,39 | 899,55 | 25,53 | AAVVALSLR | DHSB_HUMAN  | Succinate dehydrogenase [ubiquinone] iron-sulfur subunit, mitochondrial |
| 906,42 | 0,51 | 0,50 | 0,48 | 0,55 | 0,43 | 0,37 | 905,52 | 28,35 | LVPQQLAH  | COX5B_HUMAN | Cytochrome c oxidase subunit 5B, mitochondrial                          |
| 944,43 | 0,53 | 0,51 | 0,48 | 0,57 | 0,45 | 0,37 | 943,57 | 36,36 | VPPPPPIAR | HNRPC_HUMAN | Heterogeneous nuclear ribonucleoproteins C1/C2                          |
| 945,43 | 0,51 | 0,46 | 0,46 | 0,56 | 0,45 | 0,38 | 945,50 | 30,15 | LSENVIDR  | CHCH3_HUMAN | Coiled-coil-helix-coiled-coil-helix                                     |

|         |      |      |      |      |      |      |         |       |             |             |                                                           |
|---------|------|------|------|------|------|------|---------|-------|-------------|-------------|-----------------------------------------------------------|
|         |      |      |      |      |      |      |         |       |             |             | domain-containing<br>protein 3,<br>mitochondrial          |
| 974,43  | 0,49 | 0,46 | 0,44 | 0,56 | 0,43 | 0,38 | 973,60  | 45,36 | SGVSLAALKK  | H13_HUMAN   | Histone H1.3                                              |
| 976,43  | 0,52 | 0,43 | 0,40 | 0,62 | 0,35 | 0,22 | 976,45  | 88,56 | AGFAGDDAPR  | ACTA_HUMAN  | Actin, aortic smooth<br>muscle                            |
| 1094,64 | 0,52 | 0,40 | 0,37 | 0,63 | 0,37 | 0,23 | 1095,56 | 25,48 | KITIADCGQF  | PAL4A_HUMAN | Peptidyl-prolyl cis-<br>trans isomerase A-<br>like 4A/B/C |
| 1095,64 | 0,45 | 0,38 | 0,42 | 0,58 | 0,39 | 0,31 | 1095,56 | 25,48 | KITIADCGQF  | PAL4A_HUMAN | Peptidyl-prolyl cis-<br>trans isomerase A-<br>like 4A/B/C |
| 1096,64 | 0,51 | 0,43 | 0,40 | 0,59 | 0,42 | 0,32 | 1097,62 | 51,55 | VLPGVDAISNI | PGK1_HUMAN  | Phosphoglycerate<br>kinase 1                              |
| 1097,64 | 0,50 | 0,44 | 0,43 | 0,55 | 0,45 | 0,40 | 1097,62 | 51,55 | VLPGVDAISNI | PGK1_HUMAN  | Phosphoglycerate<br>kinase 1                              |
| 1105,64 | 0,47 | 0,40 | 0,41 | 0,60 | 0,42 | 0,31 |         |       |             |             |                                                           |
| 1106,64 | 0,41 | 0,36 | 0,42 | 0,58 | 0,42 | 0,32 | 1106,68 | 27,56 | VLTLLEYKK   | KCRM_HUMAN  | Creatine kinase M-<br>type                                |
| 1107,64 | 0,50 | 0,40 | 0,40 | 0,61 | 0,44 | 0,31 | 1106,68 | 27,56 | VLTLLEYKK   | KCRM_HUMAN  | Creatine kinase M-<br>type                                |
| 1108,64 | 0,51 | 0,44 | 0,43 | 0,56 | 0,45 | 0,38 | 1108,59 | 32,94 | ITALDEFATK  | SPTN1_HUMAN | Spectrin alpha chain,<br>non-erythrocytic 1               |
| 1111,64 | 0,48 | 0,42 | 0,43 | 0,61 | 0,36 | 0,26 |         |       |             |             |                                                           |
| 1112,64 | 0,50 | 0,43 | 0,42 | 0,62 | 0,39 | 0,26 |         |       |             |             |                                                           |
| 1113,64 | 0,44 | 0,43 | 0,50 | 0,55 | 0,42 | 0,37 |         |       |             |             |                                                           |

|         |      |      |      |      |      |      |         |       |             |             |                                                 |
|---------|------|------|------|------|------|------|---------|-------|-------------|-------------|-------------------------------------------------|
| 1133,44 | 0,51 | 0,50 | 0,47 | 0,59 | 0,43 | 0,34 |         |       |             |             |                                                 |
| 1134,44 | 0,53 | 0,52 | 0,48 | 0,56 | 0,43 | 0,38 | 1134,65 | 42,48 | SLNLTAFQK   | ERP29_HUMAN | Endoplasmic<br>reticulum resident<br>protein 29 |
| 1138,64 | 0,43 | 0,38 | 0,43 | 0,59 | 0,35 | 0,25 |         |       |             |             |                                                 |
| 1139,64 | 0,42 | 0,37 | 0,45 | 0,60 | 0,38 | 0,27 |         |       |             |             |                                                 |
| 1140,64 | 0,47 | 0,42 | 0,45 | 0,60 | 0,41 | 0,31 |         |       |             |             |                                                 |
| 1143,45 | 0,52 | 0,51 | 0,49 | 0,60 | 0,42 | 0,31 | 1143,63 | 28,94 | LAVNMVPFPR  | TBB5_HUMAN  | Tubulin beta chain                              |
| 1144,45 | 0,47 | 0,47 | 0,49 | 0,58 | 0,45 | 0,36 | 1143,63 | 28,94 | LAVNMVPFPR  | TBB5_HUMAN  | Tubulin beta chain                              |
| 1149,65 | 0,47 | 0,46 | 0,47 | 0,58 | 0,43 | 0,35 |         |       |             |             |                                                 |
| 1150,65 | 0,49 | 0,49 | 0,50 | 0,56 | 0,43 | 0,38 | 1150,67 | 45,55 | VLIAAHGNSLR | PGAM2_HUMAN | Phosphoglycerate<br>mutase 2                    |
| 1154,65 | 0,44 | 0,37 | 0,44 | 0,63 | 0,40 | 0,28 |         |       |             |             |                                                 |
| 1155,45 | 0,51 | 0,48 | 0,48 | 0,57 | 0,45 | 0,38 |         |       |             |             |                                                 |
| 1176,45 | 0,53 | 0,55 | 0,50 | 0,58 | 0,39 | 0,30 |         |       |             |             |                                                 |
| 1198,65 | 0,49 | 0,38 | 0,39 | 0,66 | 0,29 | 0,10 | 1198,52 | 57,19 | DSYVGDEAQSK | ACTA_HUMAN  | Actin, aortic smooth<br>muscle                  |
| 1199,65 | 0,51 | 0,42 | 0,41 | 0,65 | 0,30 | 0,12 | 1198,71 | 33,51 | AVFPSIVGRPR | ACTA_HUMAN  | Actin, aortic smooth<br>muscle                  |
| 1200,65 | 0,45 | 0,42 | 0,46 | 0,61 | 0,35 | 0,22 |         |       |             |             |                                                 |
| 1231,65 | 0,52 | 0,50 | 0,47 | 0,58 | 0,44 | 0,35 | 1232,64 | 31,53 | AMTKDNNLLGR | HSP71_HUMAN | Heat shock 70 kDa<br>protein 1A/1B              |
| 1235,65 | 0,46 | 0,38 | 0,41 | 0,57 | 0,44 | 0,36 |         |       |             |             |                                                 |
| 1236,65 | 0,49 | 0,40 | 0,40 | 0,57 | 0,42 | 0,34 |         |       |             |             |                                                 |
| 1237,65 | 0,52 | 0,45 | 0,41 | 0,57 | 0,43 | 0,37 | 1238,65 | 47,18 | VAVFFSNTPTR | CO6A3_HUMAN | Collagen alpha-3(VI)<br>chain                   |

|         |      |      |      |      |      |      |         |       |               |             |                                             |
|---------|------|------|------|------|------|------|---------|-------|---------------|-------------|---------------------------------------------|
| 1267,66 | 0,47 | 0,42 | 0,45 | 0,57 | 0,40 | 0,34 |         |       |               |             |                                             |
| 1268,66 | 0,54 | 0,47 | 0,43 | 0,59 | 0,43 | 0,34 |         |       |               |             |                                             |
| 1269,66 | 0,52 | 0,45 | 0,42 | 0,56 | 0,43 | 0,37 | 1270,56 | 37,39 | LGDLYEEEMR    | VIME_HUMAN  | Vimentin                                    |
| 1303,66 | 0,48 | 0,39 | 0,40 | 0,62 | 0,36 | 0,24 | 1303,60 | 55,78 | NALESYAFNMK   | HSP71_HUMAN | Heat shock 70 kDa protein 1A/1B             |
| 1304,66 | 0,50 | 0,42 | 0,42 | 0,62 | 0,39 | 0,27 | 1303,68 | 41,21 | PMFIVNTNVPR   | MIF_HUMAN   | Macrophage migration inhibitory factor      |
| 1305,66 | 0,47 | 0,44 | 0,45 | 0,58 | 0,41 | 0,34 | 1306,64 | 44,38 | KNIDALSGMEGR  | TNNI3_HUMAN | Troponin I, cardiac muscle                  |
| 1320,66 | 0,57 | 0,48 | 0,41 | 0,64 | 0,38 | 0,24 | 1319,70 | 49,82 | IMNTFSVVPSPK  | TBB5_HUMAN  | Tubulin beta chain                          |
| 1321,66 | 0,55 | 0,47 | 0,42 | 0,63 | 0,37 | 0,24 | 1321,74 | 51,46 | DEILLHQAAAK   | SLMAP_HUMAN | Sarcolemmal membrane-associated protein     |
| 1322,66 | 0,53 | 0,46 | 0,45 | 0,60 | 0,38 | 0,26 | 1321,74 | 51,46 | DEILLHQAAAK   | SLMAP_HUMAN | Sarcolemmal membrane-associated protein     |
| 1324,66 | 0,54 | 0,48 | 0,43 | 0,59 | 0,43 | 0,34 | 1324,71 | 33,76 | SASYNLSLTLQK  | LDB3_HUMAN  | LIM domain-binding protein 3                |
| 1325,66 | 0,45 | 0,45 | 0,48 | 0,59 | 0,44 | 0,36 | 1325,75 | 45,61 | DNIQGITKPAIR  | H4_HUMAN    | Histone H4                                  |
| 1337,66 | 0,48 | 0,40 | 0,45 | 0,57 | 0,39 | 0,33 |         |       |               |             |                                             |
| 1340,66 | 0,50 | 0,46 | 0,46 | 0,60 | 0,44 | 0,34 | 1339,72 | 51,07 | LSVISVEDPPQR  | ETFB_HUMAN  | Electron transfer flavoprotein subunit beta |
| 1341,66 | 0,46 | 0,44 | 0,46 | 0,58 | 0,42 | 0,34 | 1341,77 | 27,41 | ALVQNDTLLQVK  | H1X_HUMAN   | Histone H1x                                 |
| 1342,66 | 0,48 | 0,45 | 0,47 | 0,57 | 0,43 | 0,35 | 1342,78 | 32,68 | VIQVAAGSSNLKR | ALDH2_HUMAN | Aldehyde                                    |

|         |      |      |      |      |      |      |         |       |                |             |                                                 |
|---------|------|------|------|------|------|------|---------|-------|----------------|-------------|-------------------------------------------------|
|         |      |      |      |      |      |      |         |       |                |             | dehydrogenase,<br>mitochondrial                 |
| 1358,66 | 0,49 | 0,46 | 0,48 | 0,60 | 0,41 | 0,30 | 1358,74 | 34,89 | ISVREPMQTGIK   | ATPA_HUMAN  | ATP synthase<br>subunit alpha,<br>mitochondrial |
| 1359,66 | 0,52 | 0,47 | 0,47 | 0,63 | 0,40 | 0,26 | 1358,74 | 34,89 | ISVREPMQTGIK   | ATPA_HUMAN  | ATP synthase<br>subunit alpha,<br>mitochondrial |
| 1366,67 | 0,49 | 0,41 | 0,41 | 0,59 | 0,37 | 0,29 |         |       |                |             |                                                 |
| 1401,67 | 0,48 | 0,43 | 0,44 | 0,55 | 0,44 | 0,39 |         |       |                |             |                                                 |
| 1408,67 | 0,55 | 0,46 | 0,42 | 0,60 | 0,31 | 0,20 |         |       |                |             |                                                 |
| 1409,67 | 0,49 | 0,44 | 0,46 | 0,56 | 0,34 | 0,25 |         |       |                |             |                                                 |
| 1428,67 | 0,50 | 0,44 | 0,44 | 0,55 | 0,33 | 0,28 | 1428,71 | 40,41 | SLYASSPGGVYATR | VIME_HUMAN  | Vimentin                                        |
| 1459,67 | 0,54 | 0,46 | 0,41 | 0,61 | 0,43 | 0,32 | 1459,86 | 25,39 | IGDLHPQIVNLLK  | CO6A3_HUMAN | Collagen alpha-3(VI)<br>chain                   |
| 1460,67 | 0,56 | 0,47 | 0,40 | 0,62 | 0,43 | 0,31 | 1459,86 | 25,39 | IGDLHPQIVNLLK  | CO6A3_HUMAN | Collagen alpha-3(VI)<br>chain                   |
| 1461,67 | 0,50 | 0,42 | 0,41 | 0,58 | 0,42 | 0,33 | 1461,75 | 27,91 | ISPEEVYNNLKR   | NSUN7_HUMAN | Putative<br>methyltransferase<br>NSUN7          |
| 1462,67 | 0,48 | 0,44 | 0,45 | 0,55 | 0,44 | 0,39 | 1462,76 | 27,26 | QINVGNALEYVSR  | CO6A3_HUMAN | Collagen alpha-3(VI)<br>chain                   |
| 1465,67 | 0,47 | 0,37 | 0,39 | 0,56 | 0,39 | 0,31 |         |       |                |             |                                                 |
| 1466,67 | 0,55 | 0,43 | 0,38 | 0,60 | 0,42 | 0,32 | 1466,80 | 61,03 | TVTAMDVVYALKR  | H4_HUMAN    | Histone H4                                      |
| 1467,67 | 0,52 | 0,41 | 0,39 | 0,57 | 0,42 | 0,33 | 1466,80 | 61,03 | TVTAMDVVYALKR  | H4_HUMAN    | Histone H4                                      |
| 1477,68 | 0,54 | 0,46 | 0,43 | 0,60 | 0,43 | 0,33 |         |       |                |             |                                                 |

|         |      |      |      |      |      |      |         |       |                    |             |                           |
|---------|------|------|------|------|------|------|---------|-------|--------------------|-------------|---------------------------|
| 1478,68 | 0,55 | 0,47 | 0,43 | 0,59 | 0,45 | 0,35 | 1478,90 | 70,53 | HGATVLTALGGILKK    | MYG_HUMAN   | Myoglobin                 |
| 1479,68 | 0,48 | 0,44 | 0,47 | 0,54 | 0,43 | 0,40 | 1478,90 | 70,53 | HGATVLTALGGILKK    | MYG_HUMAN   | Myoglobin                 |
| 1493,68 | 0,49 | 0,35 | 0,37 | 0,59 | 0,45 | 0,34 |         |       |                    |             |                           |
| 1494,68 | 0,47 | 0,33 | 0,37 | 0,58 | 0,36 | 0,28 |         |       |                    |             |                           |
| 1495,68 | 0,52 | 0,37 | 0,37 | 0,59 | 0,34 | 0,26 |         |       |                    |             |                           |
| 1502,68 | 0,51 | 0,52 | 0,52 | 0,54 | 0,43 | 0,40 |         |       |                    |             |                           |
| 1503,68 | 0,50 | 0,49 | 0,48 | 0,56 | 0,46 | 0,40 | 1503,83 | 25,29 | IYISGMAPRPSLAK     | VTNC_HUMAN  | Vitronectin               |
| 1508,68 | 0,49 | 0,41 | 0,42 | 0,60 | 0,40 | 0,32 | 1507,80 | 83,26 | LSVEALNSLTGEFK     | KCRM_HUMAN  | Creatine kinase M-type    |
| 1509,68 | 0,48 | 0,42 | 0,43 | 0,57 | 0,40 | 0,33 |         |       |                    |             |                           |
| 1510,68 | 0,50 | 0,41 | 0,40 | 0,57 | 0,42 | 0,36 |         |       |                    |             |                           |
| 1515,68 | 0,52 | 0,43 | 0,41 | 0,61 | 0,41 | 0,28 |         |       |                    |             |                           |
| 1516,68 | 0,52 | 0,45 | 0,42 | 0,61 | 0,43 | 0,32 | 1516,82 | 27,34 | SKQLEDELVSLQK      | TPM1_HUMAN  | Tropomyosin alpha-1 chain |
| 1530,68 | 0,46 | 0,42 | 0,45 | 0,57 | 0,43 | 0,36 | 1529,73 | 45,35 | VGAHAGEYGAEALER    | HBA_HUMAN   | Hemoglobin subunit alpha  |
| 1531,68 | 0,50 | 0,42 | 0,41 | 0,59 | 0,41 | 0,31 |         |       |                    |             |                           |
| 1532,68 | 0,45 | 0,39 | 0,44 | 0,55 | 0,42 | 0,36 |         |       |                    |             |                           |
| 1533,68 | 0,55 | 0,47 | 0,42 | 0,58 | 0,44 | 0,34 | 1533,78 | 82,04 | VVDSLQTS LDAETR    | MYH6_HUMAN  | Myosin-6                  |
| 1534,68 | 0,51 | 0,44 | 0,43 | 0,57 | 0,47 | 0,40 | 1533,78 | 82,04 | VVDSLQTS LDAETR    | MYH6_HUMAN  | Myosin-6                  |
| 1546,88 | 0,51 | 0,37 | 0,36 | 0,61 | 0,44 | 0,31 |         |       |                    |             |                           |
| 1547,88 | 0,45 | 0,33 | 0,37 | 0,61 | 0,43 | 0,33 |         |       |                    |             |                           |
| 1548,88 | 0,48 | 0,37 | 0,39 | 0,58 | 0,45 | 0,37 |         |       |                    |             |                           |
| 1549,68 | 0,54 | 0,44 | 0,43 | 0,56 | 0,43 | 0,37 |         |       |                    |             |                           |
| 1561,88 | 0,48 | 0,38 | 0,39 | 0,60 | 0,48 | 0,37 | 1562,79 | 87,57 | GETGPSGPVGPAGAVGPR | CO1A2_HUMAN | Collagen alpha-2(I) chain |

|         |      |      |      |      |      |      |         |       |                    |             |                             |
|---------|------|------|------|------|------|------|---------|-------|--------------------|-------------|-----------------------------|
| 1562,88 | 0,46 | 0,33 | 0,36 | 0,62 | 0,40 | 0,28 | 1562,79 | 87,57 | GETGPSGPVGPAGAVGPR | CO1A2_HUMAN | Collagen alpha-2(I) chain   |
| 1563,88 | 0,47 | 0,35 | 0,36 | 0,62 | 0,41 | 0,28 |         |       |                    |             |                             |
| 1564,88 | 0,49 | 0,37 | 0,38 | 0,59 | 0,42 | 0,33 | 1564,91 | 31,49 | SIVVSPILIPENQR     | CAD13_HUMAN | Cadherin-13                 |
| 1565,88 | 0,45 | 0,38 | 0,42 | 0,54 | 0,44 | 0,40 | 1564,91 | 31,49 | SIVVSPILIPENQR     | CAD13_HUMAN | Cadherin-13                 |
| 1580,68 | 0,54 | 0,45 | 0,41 | 0,56 | 0,45 | 0,39 | 1580,80 | 43,04 | MQKEITALAPSTMK     | ACTA_HUMAN  | Actin, aortic smooth muscle |
| 1581,69 | 0,56 | 0,47 | 0,40 | 0,59 | 0,47 | 0,39 | 1580,80 | 43,04 | MQKEITALAPSTMK     | ACTA_HUMAN  | Actin, aortic smooth muscle |
| 1585,69 | 0,49 | 0,42 | 0,43 | 0,57 | 0,42 | 0,35 |         |       |                    |             |                             |
| 1586,69 | 0,57 | 0,47 | 0,42 | 0,61 | 0,44 | 0,32 |         |       |                    |             |                             |
| 1587,69 | 0,50 | 0,43 | 0,42 | 0,57 | 0,43 | 0,35 |         |       |                    |             |                             |
| 1588,69 | 0,52 | 0,46 | 0,44 | 0,55 | 0,43 | 0,39 |         |       |                    |             |                             |
| 1602,69 | 0,52 | 0,47 | 0,44 | 0,56 | 0,44 | 0,37 | 1602,89 | 31,20 | VVLAYEPVWAIGTGK    | TPIS_HUMAN  | Triosephosphate isomerase   |
| 1623,69 | 0,52 | 0,48 | 0,47 | 0,58 | 0,44 | 0,35 |         |       |                    |             |                             |
| 1624,69 | 0,50 | 0,46 | 0,47 | 0,57 | 0,43 | 0,35 |         |       |                    |             |                             |
| 1637,89 | 0,51 | 0,46 | 0,45 | 0,57 | 0,44 | 0,38 |         |       |                    |             |                             |
| 1655,89 | 0,45 | 0,38 | 0,40 | 0,58 | 0,43 | 0,35 |         |       |                    |             |                             |
| 1656,89 | 0,47 | 0,39 | 0,40 | 0,58 | 0,44 | 0,35 |         |       |                    |             |                             |
| 1669,89 | 0,47 | 0,38 | 0,39 | 0,56 | 0,41 | 0,34 |         |       |                    |             |                             |
| 1670,89 | 0,48 | 0,37 | 0,37 | 0,59 | 0,38 | 0,29 |         |       |                    |             |                             |
| 1671,89 | 0,48 | 0,39 | 0,39 | 0,57 | 0,41 | 0,34 |         |       |                    |             |                             |
| 1672,89 | 0,48 | 0,41 | 0,43 | 0,54 | 0,44 | 0,39 |         |       |                    |             |                             |
| 1685,69 | 0,48 | 0,45 | 0,44 | 0,56 | 0,42 | 0,36 |         |       |                    |             |                             |
| 1686,69 | 0,47 | 0,44 | 0,46 | 0,55 | 0,41 | 0,36 |         |       |                    |             |                             |

|         |      |      |      |      |      |      |         |       |                   |             |                                                                                  |
|---------|------|------|------|------|------|------|---------|-------|-------------------|-------------|----------------------------------------------------------------------------------|
| 1687,69 | 0,49 | 0,45 | 0,46 | 0,56 | 0,44 | 0,38 | 1687,97 | 47,44 | VGGHLRPGIVQSGGVVR | PGBM_HUMAN  | Basement<br>membrane-specific<br>heparan sulfate<br>proteoglycan core<br>protein |
| 1691,90 | 0,46 | 0,39 | 0,41 | 0,56 | 0,39 | 0,33 |         |       |                   |             |                                                                                  |
| 1692,90 | 0,45 | 0,40 | 0,41 | 0,58 | 0,44 | 0,36 |         |       |                   |             |                                                                                  |
| 1694,70 | 0,54 | 0,54 | 0,47 | 0,57 | 0,45 | 0,39 |         |       |                   |             |                                                                                  |
| 1706,70 | 0,50 | 0,37 | 0,37 | 0,57 | 0,44 | 0,37 |         |       |                   |             |                                                                                  |
| 1707,70 | 0,53 | 0,41 | 0,38 | 0,58 | 0,45 | 0,36 |         |       |                   |             |                                                                                  |
| 1708,70 | 0,51 | 0,41 | 0,39 | 0,57 | 0,44 | 0,35 |         |       |                   |             |                                                                                  |
| 1709,70 | 0,48 | 0,41 | 0,43 | 0,55 | 0,43 | 0,39 |         |       |                   |             |                                                                                  |
| 1710,90 | 0,46 | 0,41 | 0,42 | 0,60 | 0,36 | 0,26 | 1710,81 | 25,14 | FEAAETLEEAAMRSR   | KLC1_HUMAN  | Kinesin light chain 1                                                            |
| 1711,90 | 0,52 | 0,46 | 0,43 | 0,63 | 0,39 | 0,25 |         |       |                   |             |                                                                                  |
| 1712,90 | 0,49 | 0,44 | 0,45 | 0,60 | 0,39 | 0,30 |         |       |                   |             |                                                                                  |
| 1723,70 | 0,51 | 0,48 | 0,46 | 0,57 | 0,42 | 0,35 | 1723,86 | 47,13 | SPPNPDNIAPGYSGPLK | MYOZ2_HUMAN | Myozenin-2                                                                       |
| 1724,70 | 0,54 | 0,52 | 0,46 | 0,58 | 0,43 | 0,35 | 1723,86 | 47,13 | SPPNPDNIAPGYSGPLK | MYOZ2_HUMAN | Myozenin-2                                                                       |
| 1728,70 | 0,52 | 0,48 | 0,44 | 0,56 | 0,45 | 0,40 |         |       |                   |             |                                                                                  |
| 1729,70 | 0,52 | 0,48 | 0,47 | 0,55 | 0,45 | 0,40 | 1729,88 | 31,28 | VSDLTQAANKNNDALR  | DESM_HUMAN  | Desmin                                                                           |
| 1742,70 | 0,53 | 0,44 | 0,39 | 0,57 | 0,46 | 0,38 |         |       |                   |             |                                                                                  |
| 1743,70 | 0,53 | 0,43 | 0,42 | 0,59 | 0,47 | 0,38 | 1743,82 | 88,66 | AMGIMNSFVNDIFER   | H2B1B_HUMAN | Histone H2B type 1-<br>B                                                         |
| 1744,70 | 0,51 | 0,42 | 0,41 | 0,58 | 0,44 | 0,35 | 1743,82 | 88,66 | AMGIMNSFVNDIFER   | H2B1B_HUMAN | Histone H2B type 1-<br>B                                                         |
| 1745,70 | 0,53 | 0,46 | 0,43 | 0,59 | 0,44 | 0,34 |         |       |                   |             |                                                                                  |
| 1746,70 | 0,53 | 0,48 | 0,44 | 0,57 | 0,43 | 0,36 |         |       |                   |             |                                                                                  |



|         |      |      |      |      |      |      |         |       |                   |             |                                    |
|---------|------|------|------|------|------|------|---------|-------|-------------------|-------------|------------------------------------|
| 1751,90 | 0,46 | 0,38 | 0,41 | 0,56 | 0,42 | 0,35 |         |       |                   |             |                                    |
| 1752,90 | 0,49 | 0,39 | 0,39 | 0,59 | 0,44 | 0,34 |         |       |                   |             |                                    |
| 1753,90 | 0,46 | 0,39 | 0,42 | 0,56 | 0,46 | 0,39 |         |       |                   |             |                                    |
| 1766,90 | 0,47 | 0,38 | 0,40 | 0,57 | 0,46 | 0,37 |         |       |                   |             |                                    |
| 1767,90 | 0,49 | 0,39 | 0,38 | 0,57 | 0,47 | 0,39 | 1768,83 | 32,75 | DGEVVSEATQQQHEVL  | DESM_HUMAN  | Desmin                             |
| 1775,90 | 0,50 | 0,41 | 0,40 | 0,59 | 0,46 | 0,35 | 1775,81 | 48,88 | AMGIMNSFVNDIFER   | H2B1B_HUMAN | Histone H2B type 1-B               |
| 1776,90 | 0,49 | 0,40 | 0,42 | 0,59 | 0,46 | 0,35 | 1777,87 | 33,20 | SDGDPVQPAVLQVHQTS | SDPR_HUMAN  | Serum deprivation-response protein |
| 1777,90 | 0,47 | 0,38 | 0,41 | 0,56 | 0,44 | 0,37 | 1777,87 | 33,20 | SDGDPVQPAVLQVHQTS | SDPR_HUMAN  | Serum deprivation-response protein |
| 1790,90 | 0,47 | 0,39 | 0,42 | 0,57 | 0,36 | 0,27 | 1790,89 | 28,06 | SYELPDGQVITIGNER  | ACTA_HUMAN  | Actin, aortic smooth muscle        |
| 1791,90 | 0,51 | 0,42 | 0,41 | 0,59 | 0,36 | 0,26 |         |       |                   |             |                                    |
| 1797,90 | 0,49 | 0,46 | 0,44 | 0,57 | 0,46 | 0,40 | 1796,93 | 29,11 | SFMPNLVPPKIPDGER  | TNNT2_HUMAN | Troponin T, cardiac muscle         |
| 1798,90 | 0,50 | 0,44 | 0,44 | 0,57 | 0,45 | 0,38 |         |       |                   |             |                                    |
| 1816,91 | 0,45 | 0,33 | 0,36 | 0,59 | 0,44 | 0,32 |         |       |                   |             |                                    |
| 1817,91 | 0,49 | 0,36 | 0,36 | 0,60 | 0,45 | 0,31 |         |       |                   |             |                                    |
| 1818,91 | 0,49 | 0,37 | 0,38 | 0,60 | 0,46 | 0,34 |         |       |                   |             |                                    |
| 1819,91 | 0,49 | 0,42 | 0,42 | 0,59 | 0,47 | 0,38 |         |       |                   |             |                                    |
| 1820,91 | 0,52 | 0,48 | 0,46 | 0,57 | 0,47 | 0,39 |         |       |                   |             |                                    |
| 1821,91 | 0,52 | 0,50 | 0,47 | 0,56 | 0,46 | 0,40 |         |       |                   |             |                                    |
| 1832,91 | 0,50 | 0,37 | 0,36 | 0,60 | 0,42 | 0,30 |         |       |                   |             |                                    |
| 1833,91 | 0,49 | 0,35 | 0,35 | 0,60 | 0,39 | 0,28 |         |       |                   |             |                                    |
| 1834,91 | 0,46 | 0,35 | 0,38 | 0,59 | 0,42 | 0,32 |         |       |                   |             |                                    |

|         |      |      |      |      |      |      |         |       |                   |             |                            |
|---------|------|------|------|------|------|------|---------|-------|-------------------|-------------|----------------------------|
| 1835,91 | 0,46 | 0,37 | 0,40 | 0,58 | 0,44 | 0,34 | 1836,84 | 32,84 | MTAFDADDPATDNALLR | CAD13_HUMAN | Cadherin-13                |
| 1836,91 | 0,47 | 0,40 | 0,42 | 0,57 | 0,46 | 0,37 | 1836,84 | 32,84 | MTAFDADDPATDNALLR | CAD13_HUMAN | Cadherin-13                |
| 1850,91 | 0,52 | 0,46 | 0,44 | 0,59 | 0,44 | 0,34 | 1851,04 | 48,84 | VQLLHSQNTSLINQKK  | MYH6_HUMAN  | Myosin-6                   |
| 1851,91 | 0,48 | 0,43 | 0,45 | 0,58 | 0,43 | 0,34 | 1851,04 | 48,84 | VQLLHSQNTSLINQKK  | MYH6_HUMAN  | Myosin-6                   |
| 1852,91 | 0,45 | 0,41 | 0,45 | 0,56 | 0,45 | 0,38 |         |       |                   |             |                            |
| 1854,91 | 0,48 | 0,42 | 0,42 | 0,56 | 0,46 | 0,39 |         |       |                   |             |                            |
| 1855,91 | 0,49 | 0,42 | 0,43 | 0,55 | 0,46 | 0,40 |         |       |                   |             |                            |
| 1867,91 | 0,45 | 0,43 | 0,46 | 0,55 | 0,43 | 0,39 |         |       |                   |             |                            |
| 1869,91 | 0,52 | 0,47 | 0,44 | 0,57 | 0,45 | 0,39 |         |       |                   |             |                            |
| 1888,91 | 0,51 | 0,48 | 0,46 | 0,59 | 0,48 | 0,37 | 1888,00 | 33,26 | VLDFEHFLPMLQTVAK  | MYL6_HUMAN  | Myosin light polypeptide 6 |
| 1889,91 | 0,47 | 0,44 | 0,45 | 0,57 | 0,46 | 0,38 | 1890,03 | 44,46 | NITEIADLTQKIFDLR  | TNNI3_HUMAN | Troponin I, cardiac muscle |
| 1922,92 | 0,49 | 0,42 | 0,43 | 0,57 | 0,44 | 0,37 |         |       |                   |             |                            |
| 1923,92 | 0,52 | 0,44 | 0,42 | 0,60 | 0,41 | 0,30 |         |       |                   |             |                            |
| 1924,92 | 0,49 | 0,41 | 0,41 | 0,60 | 0,43 | 0,32 |         |       |                   |             |                            |
| 1925,92 | 0,48 | 0,41 | 0,43 | 0,57 | 0,42 | 0,34 |         |       |                   |             |                            |
| 1961,92 | 0,49 | 0,42 | 0,42 | 0,59 | 0,45 | 0,34 |         |       |                   |             |                            |
| 1962,92 | 0,50 | 0,43 | 0,43 | 0,60 | 0,46 | 0,34 |         |       |                   |             |                            |
| 1963,92 | 0,49 | 0,43 | 0,43 | 0,58 | 0,47 | 0,38 |         |       |                   |             |                            |
| 1964,92 | 0,47 | 0,42 | 0,45 | 0,60 | 0,47 | 0,36 |         |       |                   |             |                            |
| 2003,92 | 0,51 | 0,43 | 0,41 | 0,62 | 0,46 | 0,33 |         |       |                   |             |                            |
| 2004,92 | 0,53 | 0,43 | 0,41 | 0,58 | 0,43 | 0,35 |         |       |                   |             |                            |
| 2005,92 | 0,50 | 0,41 | 0,42 | 0,56 | 0,44 | 0,38 |         |       |                   |             |                            |
| 2041,93 | 0,52 | 0,46 | 0,45 | 0,56 | 0,44 | 0,38 |         |       |                   |             |                            |
| 2056,93 | 0,49 | 0,42 | 0,42 | 0,58 | 0,47 | 0,38 |         |       |                   |             |                            |

|         |      |      |      |      |      |      |         |       |                       |                        |
|---------|------|------|------|------|------|------|---------|-------|-----------------------|------------------------|
| 2057,93 | 0,54 | 0,45 | 0,40 | 0,59 | 0,47 | 0,37 |         |       |                       |                        |
| 2072,13 | 0,46 | 0,36 | 0,37 | 0,60 | 0,47 | 0,36 |         |       |                       |                        |
| 2073,13 | 0,44 | 0,35 | 0,37 | 0,59 | 0,45 | 0,35 |         |       |                       |                        |
| 2074,13 | 0,50 | 0,40 | 0,40 | 0,58 | 0,47 | 0,38 |         |       |                       |                        |
| 2079,93 | 0,51 | 0,46 | 0,45 | 0,56 | 0,46 | 0,39 |         |       |                       |                        |
| 2088,93 | 0,51 | 0,47 | 0,46 | 0,56 | 0,45 | 0,39 | 2088,09 | 51,57 | TFGGAPGFPLGSPVFPFR    | DESM_HUMAN<br>Desmin   |
| 2089,93 | 0,54 | 0,46 | 0,44 | 0,57 | 0,43 | 0,36 |         |       |                       |                        |
| 2094,93 | 0,48 | 0,43 | 0,43 | 0,60 | 0,45 | 0,33 |         |       |                       |                        |
| 2095,93 | 0,49 | 0,45 | 0,46 | 0,59 | 0,44 | 0,33 |         |       |                       |                        |
| 2096,93 | 0,49 | 0,47 | 0,47 | 0,58 | 0,46 | 0,38 |         |       |                       |                        |
| 2104,13 | 0,44 | 0,36 | 0,40 | 0,62 | 0,39 | 0,26 |         |       |                       |                        |
| 2105,13 | 0,44 | 0,36 | 0,41 | 0,62 | 0,38 | 0,24 |         |       |                       |                        |
| 2105,93 | 0,49 | 0,42 | 0,42 | 0,57 | 0,41 | 0,34 |         |       |                       |                        |
| 2106,93 | 0,50 | 0,43 | 0,42 | 0,55 | 0,43 | 0,38 |         |       |                       |                        |
| 2115,13 | 0,48 | 0,36 | 0,36 | 0,61 | 0,43 | 0,28 |         |       |                       |                        |
| 2116,13 | 0,49 | 0,37 | 0,38 | 0,61 | 0,42 | 0,29 |         |       |                       |                        |
| 2117,13 | 0,49 | 0,40 | 0,41 | 0,59 | 0,45 | 0,34 |         |       |                       |                        |
| 2118,13 | 0,52 | 0,43 | 0,38 | 0,60 | 0,47 | 0,36 |         |       |                       |                        |
| 2154,14 | 0,44 | 0,42 | 0,46 | 0,56 | 0,46 | 0,39 |         |       |                       |                        |
| 2163,94 | 0,49 | 0,43 | 0,43 | 0,60 | 0,44 | 0,34 |         |       |                       |                        |
| 2164,94 | 0,53 | 0,48 | 0,43 | 0,59 | 0,43 | 0,33 |         |       |                       |                        |
| 2165,94 | 0,52 | 0,48 | 0,45 | 0,57 | 0,45 | 0,38 |         |       |                       |                        |
| 2199,94 | 0,50 | 0,42 | 0,42 | 0,57 | 0,46 | 0,39 | 2200,12 | 49,68 | GTLEDQIIQANPALEAFGNAK | MYH6_HUMAN<br>Myosin-6 |
| 2215,94 | 0,52 | 0,40 | 0,36 | 0,60 | 0,39 | 0,29 |         |       |                       |                        |
| 2217,14 | 0,48 | 0,34 | 0,34 | 0,59 | 0,35 | 0,26 |         |       |                       |                        |
| 2218,14 | 0,45 | 0,33 | 0,37 | 0,57 | 0,38 | 0,31 |         |       |                       |                        |

|         |      |      |      |      |      |      |
|---------|------|------|------|------|------|------|
| 2461,17 | 0,48 | 0,43 | 0,46 | 0,62 | 0,46 | 0,33 |
| 2462,17 | 0,47 | 0,43 | 0,44 | 0,61 | 0,44 | 0,31 |
| 2463,17 | 0,52 | 0,46 | 0,45 | 0,62 | 0,45 | 0,32 |
| 2477,17 | 0,50 | 0,44 | 0,43 | 0,61 | 0,43 | 0,31 |
| 2478,17 | 0,47 | 0,42 | 0,44 | 0,61 | 0,43 | 0,32 |
| 2479,17 | 0,49 | 0,45 | 0,47 | 0,58 | 0,44 | 0,36 |
| 2493,17 | 0,49 | 0,43 | 0,42 | 0,59 | 0,45 | 0,35 |
| 2675,18 | 0,50 | 0,47 | 0,45 | 0,60 | 0,51 | 0,40 |
| 2676,18 | 0,54 | 0,49 | 0,46 | 0,62 | 0,50 | 0,38 |
| 2691,19 | 0,50 | 0,47 | 0,46 | 0,59 | 0,50 | 0,39 |
| 2692,19 | 0,51 | 0,47 | 0,46 | 0,59 | 0,48 | 0,37 |
| 2869,40 | 0,51 | 0,39 | 0,37 | 0,62 | 0,43 | 0,29 |
| 2870,40 | 0,49 | 0,36 | 0,37 | 0,61 | 0,40 | 0,26 |
| 2871,40 | 0,47 | 0,34 | 0,36 | 0,61 | 0,42 | 0,29 |
| 2872,40 | 0,46 | 0,36 | 0,39 | 0,58 | 0,43 | 0,34 |
| 2950,41 | 0,48 | 0,41 | 0,42 | 0,62 | 0,41 | 0,27 |
| 2951,41 | 0,47 | 0,39 | 0,40 | 0,62 | 0,40 | 0,27 |
| 2952,41 | 0,45 | 0,37 | 0,41 | 0,63 | 0,40 | 0,26 |
| 2953,41 | 0,49 | 0,42 | 0,41 | 0,62 | 0,44 | 0,31 |
| 2960,41 | 0,43 | 0,34 | 0,38 | 0,60 | 0,50 | 0,38 |
| 2961,41 | 0,45 | 0,35 | 0,38 | 0,62 | 0,52 | 0,38 |

**Supplementary Table S4.** Differential intensity distributions of all peptides (MALDI-MSI) and their corresponding proteins from the tunica adventitia in TAA, AAA and EVAR tissue sections

| MALDI-<br>MSI<br>value [Da] | ROC<br>Adventitia<br>AAA<br>vs.<br>EVAR | [AUC] | ROC<br>Adventitia<br>AAA vs. TAA | [AUC] | ROC<br>Adventitia<br>EVAR<br>vs.<br>TAA | [AUC] | LC-MS<br>[MH+Calc.] | Scores | Sequence          | Gene<br>Symbol | Protein                                                              |
|-----------------------------|-----------------------------------------|-------|----------------------------------|-------|-----------------------------------------|-------|---------------------|--------|-------------------|----------------|----------------------------------------------------------------------|
| 1315,66                     | 0,48                                    |       | 0,50                             |       | 0,53                                    |       | 1316,64             | 52,08  | NELESYAYSLK       | HEL-S-89n      | 78 kDa glucose-regulated protein                                     |
| 1529,68                     | 0,46                                    |       | 0,57                             |       | 0,59                                    |       | 1528,74             | 37,32  | AKFEELNMDLFR      |                |                                                                      |
| 976,43                      | 0,52                                    |       | 0,43                             |       | 0,40                                    |       | 976,45              | 88,56  | AGFAGDDAPR        | ACTA2          | Actin, aortic smooth muscle                                          |
| 1198,65                     | 0,49                                    |       | 0,38                             |       | 0,39                                    |       | 1198,52             | 57,19  | DSYVGDEAQSK       |                |                                                                      |
| 1198,65                     | 0,49                                    |       | 0,38                             |       | 0,39                                    |       | 1198,70             | 41,77  | AVFPSIVGRPR       |                |                                                                      |
| 1353,66                     | 0,49                                    |       | 0,48                             |       | 0,49                                    |       | 1354,62             | 48,47  | DSYVGDEAQSKR      |                |                                                                      |
| 1580,68                     | 0,54                                    |       | 0,45                             |       | 0,41                                    |       | 1580,80             | 43,04  | MQKEITALAPSTMK    |                |                                                                      |
| 1790,90                     | 0,47                                    |       | 0,39                             |       | 0,42                                    |       | 1790,89             | 28,06  | SYELPDGQVITIGNER  |                |                                                                      |
| 1342,66                     | 0,48                                    |       | 0,45                             |       | 0,47                                    |       | 1342,78             | 32,68  | VIQVAAGSSNLKR     | ALDH1B1        | Aldehyde dehydrogenase, mitochondrial                                |
| 1230,65                     | 0,44                                    |       | 0,45                             |       | 0,49                                    |       | 1229,68             | 27     | ELIIGDRQTGK       | ATP5F1A        | ATP synthase subunit alpha, mitochondrial                            |
| 1358,66                     | 0,49                                    |       | 0,46                             |       | 0,48                                    |       | 1358,74             | 34,89  | ISVREPMQTGIK      |                |                                                                      |
| 1127,64                     | 0,46                                    |       | 0,43                             |       | 0,47                                    |       | 1126,64             | 32,56  | LEGDTLIIPR        | HSPG2          | Basement membrane-specific heparan sulfate proteoglycan core protein |
| 1687,69                     | 0,49                                    |       | 0,45                             |       | 0,46                                    |       | 1687,97             | 47,44  | VGGHLRPGIVQSGGVVR |                |                                                                      |
| 1790,90                     | 0,47                                    |       | 0,39                             |       | 0,42                                    |       | 1790,89             | 28,06  | SYELPDGQVITIGNER  | ACTBL2         | Beta-actin-like protein 2                                            |
| 2026,93                     | 0,49                                    |       | 0,50                             |       | 0,50                                    |       | 2027,13             | 31,14  | NHLVEIPPNLPSLVELR | BGN            | Biglycan                                                             |
| 1564,88                     | 0,49                                    |       | 0,37                             |       | 0,38                                    |       | 1564,91             | 31,49  | SIVVSPILIPENQR    | CDH13          | Cadherin-13                                                          |
| 1835,91                     | 0,46                                    |       | 0,37                             |       | 0,40                                    |       | 1836,84             | 32,84  | MTAFDADDPATDNALLR |                |                                                                      |
| 877,02                      | 0,53                                    |       | 0,53                             |       | 0,51                                    |       | 876,46              | 59,95  | LPASFDAR          | CTSB           | Cathepsin B                                                          |

|         |      |      |      |         |       |                        |         |                                                                                |
|---------|------|------|------|---------|-------|------------------------|---------|--------------------------------------------------------------------------------|
| 981,43  | 0,45 | 0,49 | 0,53 | 981,63  | 32,21 | LLLPTPTVK              | CCAR1   | Cell division cycle and apoptosis regulator protein 1                          |
| 945,43  | 0,51 | 0,46 | 0,46 | 945,50  | 30,15 | LSENVIDR               | CHCHD10 | Coiled-coil-helix-coiled-coil-helix domain-containing protein 3, mitochondrial |
| 836,42  | 0,52 | 0,43 | 0,41 | 836,44  | 49,08 | GPAGPQGPR              | COL1A1  | Collagen alpha-1(I) chain                                                      |
| 852,42  | 0,54 | 0,45 | 0,42 | 851,42  | 43,88 | GFSGLDGAK              |         |                                                                                |
| 868,42  | 0,50 | 0,42 | 0,43 | 868,43  | 34,63 | GEAGPQGPR              |         |                                                                                |
| 886,42  | 0,49 | 0,40 | 0,41 | 886,44  | 47,39 | GSEGPQGV               |         |                                                                                |
| 784,41  | 0,51 | 0,46 | 0,45 | 785,39  | 48,12 | GDQGPVGR               | COL1A2  | Collagen alpha-2(I) chain                                                      |
| 1223,65 | 0,46 | 0,45 | 0,48 | 1223,61 | 65,83 | GPAGPSGPAGKDGR         |         |                                                                                |
| 1561,88 | 0,48 | 0,38 | 0,39 | 1562,79 | 87,57 | GETGPSGPVGPAGAVGPR     |         |                                                                                |
| 2026,93 | 0,49 | 0,50 | 0,50 | 2027,01 | 39,23 | HGNRGETGPSGPVGPAGAVGPR |         |                                                                                |
| 1214,65 | 0,47 | 0,44 | 0,47 | 1214,69 | 44,56 | LFVAPNQNLK             | COL6A2  | Collagen alpha-2(VI) chain                                                     |
| 823,42  | 0,50 | 0,50 | 0,50 | 823,48  | 51,16 | VGLEHLR                | COL6A3  | Collagen alpha-3(VI) chain                                                     |
| 1237,65 | 0,52 | 0,45 | 0,41 | 1238,65 | 47,18 | VAVFFSNTPTR            |         |                                                                                |
| 1459,67 | 0,54 | 0,46 | 0,41 | 1459,86 | 25,39 | IGDLHPQIVNLLK          |         |                                                                                |
| 1462,67 | 0,48 | 0,44 | 0,45 | 1462,76 | 27,26 | QINVGNALEYVSR          |         |                                                                                |
| 1106,64 | 0,41 | 0,36 | 0,42 | 1106,68 | 27,56 | VLTELYKK               | CKM     | Creatine kinase M-type                                                         |
| 1302,66 | 0,48 | 0,43 | 0,43 | 1302,63 | 33,03 | GQSIDDMIPAQK           |         |                                                                                |
| 1508,68 | 0,49 | 0,41 | 0,42 | 1507,80 | 83,26 | LSVEALNSLTGEFK         |         |                                                                                |
| 1508,68 | 0,49 | 0,41 | 0,42 | 1507,70 | 58,36 | GGDDLDPNYVLSSR         |         |                                                                                |
| 906,42  | 0,51 | 0,50 | 0,48 | 905,52  | 28,35 | LVPQQLAH               | COX5B   | Cytochrome c oxidase subunit 5B, mitochondrial                                 |
| 1352,66 | 0,50 | 0,48 | 0,47 | 1352,73 | 25,67 | ELHLDNNKLTR            | DCN     | Decorin                                                                        |
| 1032,64 | 0,43 | 0,49 | 0,55 | 1032,54 | 88,47 | TSGGAGGLGSLR           | DES     | Desmin                                                                         |
| 1729,70 | 0,52 | 0,48 | 0,47 | 1729,88 | 31,28 | VSDLTQAANKNNDALR       |         |                                                                                |
| 1767,90 | 0,49 | 0,39 | 0,38 | 1768,83 | 32,75 | DGEVVSEATQQQHEVL       |         |                                                                                |
| 2088,93 | 0,51 | 0,47 | 0,46 | 2088,09 | 51,57 | TFGGAPGFPLGSPLSPVFPR   |         |                                                                                |
| 816,42  | 0,45 | 0,46 | 0,51 | 817,41  | 26,25 | DQQIGEK                | MCM2    | DNA replication licensing factor                                               |

|         |      |      |      |         |       |                     |         |                                                |
|---------|------|------|------|---------|-------|---------------------|---------|------------------------------------------------|
|         |      |      |      |         |       |                     |         | MCM2                                           |
| 853,42  | 0,52 | 0,43 | 0,42 | 853,52  | 55,31 | LGPLQVAR            | ETFB    | Electron transfer flavoprotein subunit beta    |
| 1340,66 | 0,50 | 0,46 | 0,46 | 1339,72 | 51,07 | LSVISVEDPPQR        |         |                                                |
| 1134,44 | 0,53 | 0,52 | 0,48 | 1134,65 | 42,48 | SLNILTAFAQK         | ERP29   | Endoplasmic reticulum resident protein 29      |
| 1561,88 | 0,48 | 0,38 | 0,39 | 1562,82 | 30,26 | PYQYPALTPEQKK       | ALDOA   | Fructose-bisphosphate aldolase A               |
| 2038,93 | 0,49 | 0,43 | 0,45 | 2038,06 | 32,53 | VTGPEGALFEHSVETPLVR | SGCG    | Gamma-sarcoglycan                              |
| 1066,04 | 0,55 | 0,53 | 0,49 | 1065,59 | 31,49 | AGAHLQGGAKR         | GAPDH   | Glyceraldehyde-3-phosphate dehydrogenase       |
| 1231,65 | 0,52 | 0,50 | 0,47 | 1232,64 | 31,53 | AMTKDNNLLGR         | HSPA1A  | Heat shock 70 kDa protein 1A/1B                |
| 1302,66 | 0,48 | 0,43 | 0,43 | 1303,60 | 55,78 | NALESYAFNMK         |         |                                                |
| 1487,68 | 0,48 | 0,43 | 0,47 | 1487,70 | 46,55 | TTPSYVAFTDTER       |         |                                                |
| 1231,65 | 0,52 | 0,50 | 0,47 | 1232,64 | 31,53 | AMTKDNNLLGR         | HSPA6   | Heat shock 70 kDa protein 6                    |
| 1487,68 | 0,48 | 0,43 | 0,47 | 1487,70 | 46,55 | TTPSYVAFTDTER       |         |                                                |
| 1487,68 | 0,48 | 0,43 | 0,47 | 1487,70 | 46,55 | TTPSYVAFTDTER       | HSPA8   | Heat shock cognate 71 kDa protein              |
| 1487,68 | 0,48 | 0,43 | 0,47 | 1487,70 | 46,55 | TTPSYVAFTDTER       | HSPA2   | Heat shock-related 70 kDa protein 2            |
| 1529,68 | 0,46 | 0,57 | 0,59 | 1529,73 | 45,35 | VGAHAGEYGAEALER     | HBA1    | Hemoglobin subunit alpha                       |
| 1628,69 | 0,48 | 0,44 | 0,45 | 1628,78 | 58,18 | SSGPYGGGGQYFAKPR    | HNRNPA1 | Heterogeneous nuclear ribonucleoprotein A1     |
| 944,43  | 0,53 | 0,51 | 0,48 | 943,57  | 36,36 | VPPPPPIAR           | HNRNPC  | Heterogeneous nuclear ribonucleoproteins C1/C2 |
| 974,43  | 0,49 | 0,46 | 0,44 | 973,60  | 45,36 | SGVSLAALKK          | H1-3    | Histone H1.3                                   |
| 1106,64 | 0,41 | 0,36 | 0,42 | 1107,57 | 47,87 | ALAAAGYDVEK         |         |                                                |
| 1198,65 | 0,49 | 0,38 | 0,39 | 1198,67 | 64,14 | ASGPPVSELITK        |         |                                                |
| 1326,66 | 0,44 | 0,46 | 0,53 | 1326,76 | 42,44 | KASGPPVSELITK       |         |                                                |
| 1106,64 | 0,41 | 0,36 | 0,42 | 1107,57 | 47,87 | ALAAAGYDVEK         | H1-6    | Histone H1t                                    |
| 1341,66 | 0,46 | 0,44 | 0,46 | 1341,77 | 27,41 | ALVQNDTLLQVK        | H1-10   | Histone H1x                                    |

|         |      |      |      |         |       |                      |        |                                        |
|---------|------|------|------|---------|-------|----------------------|--------|----------------------------------------|
| 944,43  | 0,53 | 0,51 | 0,48 | 944,53  | 61,97 | AGLQFPVGR            | H2AC18 | Histone H2A type 2-A                   |
| 1743,70 | 0,53 | 0,43 | 0,42 | 1743,82 | 88,66 | AMGIMNSFVNDIFER      | H2BC3  | Histone H2B type 1-B                   |
| 688,40  | 0,51 | 0,51 | 0,48 | 688,43  | 27,64 | KQLATK               | H3-4   | Histone H3.1t                          |
| 688,40  | 0,51 | 0,51 | 0,48 | 688,41  | 35,49 | VTIMPK               |        |                                        |
| 1032,64 | 0,43 | 0,49 | 0,55 | 1032,59 | 28,91 | YRPGTVALR            |        |                                        |
| 1325,66 | 0,45 | 0,45 | 0,48 | 1325,75 | 45,61 | DNIQGITKPAIR         | H4C1   | Histone H4                             |
| 1466,67 | 0,55 | 0,43 | 0,38 | 1466,80 | 61,03 | TVTAMDVVYALKR        |        |                                        |
| 1481,68 | 0,47 | 0,43 | 0,46 | 1481,85 | 29,78 | DNIQGITKPAIRR        |        |                                        |
| 852,42  | 0,54 | 0,45 | 0,42 | 851,44  | 26,56 | DTLMISR              | IGHG1  | Ig gamma-1 chain C region              |
| 1710,90 | 0,46 | 0,41 | 0,42 | 1710,81 | 25,14 | FEAAETLEEAAMRSR      | KLC1   | Kinesin light chain 1                  |
| 1848,91 | 0,46 | 0,39 | 0,43 | 1848,87 | 52,86 | AGNSLAASTAEETAGSAQGR | LAMB2  | Laminin subunit beta-2                 |
| 1324,66 | 0,54 | 0,48 | 0,43 | 1324,71 | 33,76 | SASYNLSLTLQK         | LDB3   | LIM domain-binding protein 3           |
| 1648,69 | 0,54 | 0,50 | 0,45 | 1648,88 | 61,58 | GGPAYTPAGPQVPPLAR    |        |                                        |
| 1303,66 | 0,48 | 0,39 | 0,40 | 1303,68 | 41,21 | PMFIVNTNVPR          | MIF    | Macrophage migration inhibitory factor |
| 644,00  | 0,53 | 0,54 | 0,52 | 643,41  | 33,2  | AQIALK               | MDH1   | Malate dehydrogenase, cytoplasmic      |
| 1060,04 | 0,51 | 0,53 | 0,53 | 1060,54 | 34,27 | DFADIPNLR            | OGN    | Mimecan                                |
| 2027,93 | 0,53 | 0,52 | 0,45 | 2027,97 | 32,96 | TETTMSPLTNTTTSQGTR   | MUC5B  | Mucin-5B                               |
| 877,02  | 0,53 | 0,53 | 0,51 | 876,53  | 44,21 | ALELFRK              | MB     | Myoglobin                              |
| 1478,68 | 0,55 | 0,47 | 0,43 | 1478,90 | 70,53 | HGATVLTALGGILKK      |        |                                        |
| 1264,46 | 0,48 | 0,48 | 0,50 | 1263,60 | 47,85 | ESNGTVMGAELR         | MYL4   | Myosin light chain 4                   |
| 1888,91 | 0,51 | 0,48 | 0,46 | 1888,00 | 33,26 | VLDFEHFLPMLQTVAK     | MYL6   | Myosin light polypeptide 6             |
| 1060,04 | 0,51 | 0,53 | 0,53 | 1060,51 | 50,2  | ANSEVAQWR            | MYH13  | Myosin-13                              |
| 1060,04 | 0,51 | 0,53 | 0,53 | 1060,51 | 50,2  | ANSEVAQWR            | MYH3   | Myosin-3                               |
| 1060,04 | 0,51 | 0,53 | 0,53 | 1060,51 | 50,2  | ANSEVAQWR            | MYO6   | Myosin-6                               |
| 1082,04 | 0,51 | 0,52 | 0,51 | 1081,53 | 50,48 | SLNDFTTQR            |        |                                        |
| 1533,68 | 0,55 | 0,47 | 0,42 | 1533,78 | 82,04 | VVDSLQTS LDAETR      |        |                                        |
| 1768,90 | 0,47 | 0,39 | 0,42 | 1768,96 | 66,66 | ILNPVAIPEGQFIDSR     |        |                                        |



|         |      |      |      |         |       |                       |         |                                                   |  |  |
|---------|------|------|------|---------|-------|-----------------------|---------|---------------------------------------------------|--|--|
| 1850,91 | 0,52 | 0,46 | 0,44 | 1851,04 | 48,84 | VQLLHSQNTSLINQKK      |         |                                                   |  |  |
| 1966,92 | 0,49 | 0,48 | 0,51 | 1967,02 | 30,33 | DLEEATLQHEATAAALRK    |         |                                                   |  |  |
| 2088,93 | 0,51 | 0,47 | 0,46 | 2088,12 | 33,09 | YRILNPVAIPEGQFIDSR    |         |                                                   |  |  |
| 2199,94 | 0,50 | 0,42 | 0,42 | 2200,12 | 49,68 | GTLEDQIIQANPALEAFGNAK |         |                                                   |  |  |
| 1060,04 | 0,51 | 0,53 | 0,53 | 1060,51 | 50,2  | ANSEVAQWR             | MYH7    | Myosin-7                                          |  |  |
| 1533,68 | 0,55 | 0,47 | 0,42 | 1533,78 | 82,04 | VVDSLQTS LDAETR       |         |                                                   |  |  |
| 1850,91 | 0,52 | 0,46 | 0,44 | 1851,04 | 48,84 | VQLLHSQNTSLINQKK      |         |                                                   |  |  |
| 1966,92 | 0,49 | 0,48 | 0,51 | 1967,02 | 30,33 | DLEEATLQHEATAAALRK    |         |                                                   |  |  |
| 2199,94 | 0,50 | 0,42 | 0,42 | 2200,12 | 49,68 | GTLEDQIIQANPALEAFGNAK |         |                                                   |  |  |
| 1848,91 | 0,46 | 0,39 | 0,43 | 1848,90 | 37,01 | SVEVAAGSPAVFEAETER    | MYBPC3  | Myosin-binding protein C, cardiac-type            |  |  |
| 1572,68 | 0,49 | 0,49 | 0,52 | 1572,77 | 49,39 | DIMLEELSHLSNR         | MYOZ2   | Myozenin-2                                        |  |  |
| 1723,70 | 0,51 | 0,48 | 0,46 | 1723,86 | 47,13 | SPPNPNDNIAPGYSGPLK    |         |                                                   |  |  |
| 1359,66 | 0,52 | 0,47 | 0,47 | 1359,67 | 25,52 | LLEENQESLR            | NES     | Nestin                                            |  |  |
| 1094,64 | 0,52 | 0,40 | 0,37 | 1095,56 | 25,48 | KITIADCGQF            | PPIAL4A | Peptidyl-prolyl cis-trans isomerase A-like 4A/B/C |  |  |
| 1106,64 | 0,41 | 0,36 | 0,42 | 1107,60 | 25,88 | TIAQDYGV LK           | PRDX1   | Peroxiredoxin-1                                   |  |  |
| 1096,64 | 0,51 | 0,43 | 0,40 | 1097,62 | 51,55 | VLPGVDALSNI           | PGK1    | Phosphoglycerate kinase 1                         |  |  |
| 976,43  | 0,52 | 0,43 | 0,40 | 975,49  | 36,63 | AMEAVAAQ GK           | PGAM2   | Phosphoglycerate mutase 2                         |  |  |
| 1150,65 | 0,49 | 0,49 | 0,50 | 1150,67 | 45,55 | VLIAAHGNSLR           |         |                                                   |  |  |
| 976,43  | 0,52 | 0,43 | 0,40 | 976,45  | 88,56 | AGFAGDDAPR            | POTEE   | POTE ankyrin domain family member E               |  |  |
| 1199,65 | 0,51 | 0,42 | 0,41 | 1198,71 | 33,51 | AVFPSIVGRPR           |         |                                                   |  |  |
| 1790,90 | 0,47 | 0,39 | 0,42 | 1790,89 | 28,06 | SYELPDGQVITIGNER      |         |                                                   |  |  |
| 1967,92 | 0,47 | 0,48 | 0,51 | 1968,08 | 25,89 | VAPEEHPILLTEAPLNPK    |         |                                                   |  |  |
| 976,43  | 0,52 | 0,43 | 0,40 | 976,45  | 88,56 | AGFAGDDAPR            | POTEF   | POTE ankyrin domain family member F               |  |  |
| 1199,65 | 0,51 | 0,42 | 0,41 | 1198,71 | 33,51 | AVFPSIVGRPR           |         |                                                   |  |  |
| 1790,90 | 0,47 | 0,39 | 0,42 | 1790,89 | 28,06 | SYELPDGQVITIGNER      |         |                                                   |  |  |
| 976,43  | 0,52 | 0,43 | 0,40 | 976,45  | 88,56 | AGFAGDDAPR            | POTEI   | POTE ankyrin domain family                        |  |  |

|         |      |      |      |         |       |                    |        |                                                                         |
|---------|------|------|------|---------|-------|--------------------|--------|-------------------------------------------------------------------------|
|         |      |      |      |         |       |                    |        | member I                                                                |
| 1199,65 | 0,51 | 0,42 | 0,41 | 1198,71 | 33,51 | AVFPSIVGRPR        |        |                                                                         |
| 1967,92 | 0,47 | 0,48 | 0,51 | 1968,08 | 25,89 | VAPEEHPILLTEAPLNPK |        |                                                                         |
| 976,43  | 0,52 | 0,43 | 0,40 | 976,45  | 88,56 | AGFAGDDAPR         | POTEJ  | POTE ankyrin domain family member J                                     |
| 1967,92 | 0,47 | 0,48 | 0,51 | 1968,08 | 25,89 | VAPEEHPILLTEAPLNPK |        |                                                                         |
| 1565,88 | 0,45 | 0,38 | 0,42 | 1566,75 | 43,84 | SVGGSGGGSFGDNLVTR  | LMNA   | Prelamin-A/C                                                            |
| 1564,88 | 0,49 | 0,37 | 0,38 | 1565,86 | 29,41 | NLMQLNLAHNILR      | PRELP  | Prolargin                                                               |
| 1790,90 | 0,47 | 0,39 | 0,42 | 1790,89 | 28,06 | SYELPDGQVITIGNER   | POTEKP | Putative beta-actin-like protein 3                                      |
| 1967,92 | 0,47 | 0,48 | 0,51 | 1968,08 | 25,89 | VAPEEHPILLTEAPLNPK |        |                                                                         |
| 1461,67 | 0,50 | 0,42 | 0,41 | 1461,75 | 27,91 | ISPEEVYNNLKR       | NSUN7  | Putative methyltransferase NSUN7                                        |
| 1462,67 | 0,48 | 0,44 | 0,45 | 1461,75 | 27,91 | ISPEEVYNNLKR       |        |                                                                         |
| 840,42  | 0,47 | 0,45 | 0,48 | 840,47  | 26,42 | RLNNAPR            | SHISA8 | Putative protein shisa-8                                                |
| 1321,66 | 0,55 | 0,47 | 0,42 | 1321,74 | 51,46 | DEILLHQAAAK        | SLMAP  | Sarcolemmal membrane-associated protein                                 |
| 1391,67 | 0,46 | 0,48 | 0,51 | 1391,72 | 25,9  | AEIGIAMGSGTAVAK    | ATP2A2 | Sarcoplasmic/endoplasmic reticulum calcium ATPase 2                     |
| 1776,90 | 0,49 | 0,40 | 0,42 | 1777,87 | 33,2  | SDGDPVQPAVLQVHQTS  | SDPR   | Serum deprivation-response protein                                      |
| 1107,64 | 0,50 | 0,40 | 0,40 | 1108,59 | 32,94 | ITALDEFATK         | Sptan1 | Spectrin alpha chain, non-erythrocytic 1                                |
| 899,42  | 0,54 | 0,47 | 0,42 | 899,55  | 25,53 | AAVVALSLR          | SDHB   | Succinate dehydrogenase [ubiquinone] iron-sulfur subunit, mitochondrial |
| 1302,66 | 0,48 | 0,43 | 0,43 | 1302,74 | 29,55 | SLRFPLALEEK        | TTN    | Titin                                                                   |
| 1315,66 | 0,48 | 0,50 | 0,53 | 1315,72 | 29,24 | AGEDVQVLIPFK       |        |                                                                         |
| 1602,69 | 0,52 | 0,47 | 0,44 | 1602,89 | 31,2  | VVLAYEPVWAIGTGK    | TPI1   | Triosephosphate isomerase                                               |
| 875,42  | 0,51 | 0,48 | 0,46 | 875,45  | 30,27 | SLEAQAEK           | TPM1   | Tropomyosin alpha-1 chain                                               |
| 1314,66 | 0,46 | 0,49 | 0,55 | 1314,76 | 40,4  | KLVIIESDLER        |        |                                                                         |

|         |      |      |      |         |       |                  |         |                            |
|---------|------|------|------|---------|-------|------------------|---------|----------------------------|
| 1460,67 | 0,56 | 0,47 | 0,40 | 1460,73 | 39,4  | KATDAEADVASLNR   |         |                            |
| 1488,68 | 0,54 | 0,48 | 0,43 | 1488,74 | 27,75 | ATDAEADVASLNRR   |         |                            |
| 1516,68 | 0,52 | 0,45 | 0,42 | 1516,82 | 27,34 | SKQLEDELVSLQK    |         |                            |
| 875,42  | 0,51 | 0,48 | 0,46 | 875,45  | 30,27 | SLEAQAEK         | TPM3    | Tropomyosin alpha-3 chain  |
| 1460,67 | 0,56 | 0,47 | 0,40 | 1460,73 | 39,4  | KATDAEADVASLNR   | TPM2    | Tropomyosin beta chain     |
| 1488,68 | 0,54 | 0,48 | 0,43 | 1488,74 | 27,75 | ATDAEADVASLNRR   |         |                            |
| 1305,66 | 0,47 | 0,44 | 0,45 | 1306,64 | 44,38 | KNIDALSGMEGR     | TNNI3   | Troponin I, cardiac muscle |
| 1479,68 | 0,48 | 0,44 | 0,47 | 1479,73 | 42,27 | ISADAMMQALLGAR   |         |                            |
| 1889,91 | 0,47 | 0,44 | 0,45 | 1890,03 | 44,46 | NITEIADLTQKIFDLR |         |                            |
| 758,41  | 0,50 | 0,45 | 0,46 | 757,47  | 35,39 | ILAERR           | TNNT2   | Troponin T, cardiac muscle |
| 906,42  | 0,51 | 0,50 | 0,48 | 906,50  | 26,65 | YEINVLR          |         |                            |
| 1797,90 | 0,49 | 0,46 | 0,44 | 1796,93 | 29,11 | SFMPNLVPPKIPDGER |         |                            |
| 1143,45 | 0,52 | 0,51 | 0,49 | 1143,63 | 28,94 | LAVNMVPPFPR      | TUBB    | Tubulin beta chain         |
| 1320,66 | 0,57 | 0,48 | 0,41 | 1319,70 | 49,82 | IMNTFSVVPSPK     |         |                            |
| 1620,69 | 0,52 | 0,45 | 0,44 | 1620,83 | 34,82 | LHFFMPGFAPLTSR   |         |                            |
| 1143,45 | 0,52 | 0,51 | 0,49 | 1143,63 | 28,94 | LAVNMVPPFPR      | TUBB1   | Tubulin beta-1 chain       |
| 1143,45 | 0,52 | 0,51 | 0,49 | 1143,63 | 28,94 | LAVNMVPPFPR      | TUBB3   | Tubulin beta-3 chain       |
| 1320,66 | 0,57 | 0,48 | 0,41 | 1319,70 | 49,82 | IMNTFSVVPSPK     |         |                            |
| 1143,45 | 0,52 | 0,51 | 0,49 | 1143,63 | 28,94 | LAVNMVPPFPR      | TUBB4B  | Tubulin beta-4B chain      |
| 1320,66 | 0,57 | 0,48 | 0,41 | 1319,70 | 49,82 | IMNTFSVVPSPK     |         |                            |
| 1602,69 | 0,52 | 0,47 | 0,44 | 1601,82 | 30,14 | AVLVDLEPGTMDSVR  |         |                            |
| 1620,69 | 0,52 | 0,45 | 0,44 | 1620,83 | 34,82 | LHFFMPGFAPLTSR   |         |                            |
| 1143,45 | 0,52 | 0,51 | 0,49 | 1143,63 | 28,94 | LAVNMVPPFPR      | TUBB6   | Tubulin beta-6 chain       |
| 1620,69 | 0,52 | 0,45 | 0,44 | 1620,83 | 34,82 | LHFFMPGFAPLTSR   |         |                            |
| 1143,45 | 0,52 | 0,51 | 0,49 | 1143,63 | 28,94 | LAVNMVPPFPR      | TUBB8   | Tubulin beta-8 chain       |
| 1602,69 | 0,52 | 0,47 | 0,44 | 1601,82 | 30,14 | AVLVDLEPGTMDSVR  |         |                            |
| 1620,69 | 0,52 | 0,45 | 0,44 | 1620,83 | 34,82 | LHFFMPGFAPLTSR   |         |                            |
| 1320,66 | 0,57 | 0,48 | 0,41 | 1320,71 | 38,4  | TSAALSTVGSISR    | TPD52L2 | Tumor protein D54          |
| 1269,66 | 0,52 | 0,45 | 0,42 | 1270,56 | 37,39 | LGLDYEEEMR       | VIM     | Vimentin                   |
| 1428,67 | 0,50 | 0,44 | 0,44 | 1428,71 | 40,41 | SLYASSPGGVYATR   |         |                            |

|         |      |      |      |         |       |                        |     |             |
|---------|------|------|------|---------|-------|------------------------|-----|-------------|
| 2498,17 | 0,50 | 0,46 | 0,45 | 2497,26 | 42,86 | LLQDSVDFSLADAINTEFKNTR |     |             |
| 1503,68 | 0,50 | 0,49 | 0,48 | 1503,83 | 25,29 | IYISGMAPRPSLAK         | VTN | Vitronectin |

**Supplementary Table S5.** Differential intensity distributions of all peptides (MALDI-MSI) and their corresponding proteins from the tunica media in TAA, AAA and EVAR tissue sections

| MALDI-<br>MSI<br>value [Da] | ROC [AUC]<br>Media AAA<br>vs. EVAR | ROC [AUC]<br>Media AAA<br>vs. TAA | ROC [AUC]<br>Media<br>EVAR<br>vs.<br>TAA | LC-MS<br>[MH+Calc.] | Scores | Sequence          | Gene<br>Symbol | Protein                                                                 |
|-----------------------------|------------------------------------|-----------------------------------|------------------------------------------|---------------------|--------|-------------------|----------------|-------------------------------------------------------------------------|
| 1315,66                     | 0,51                               | 0,42                              | 0,42                                     | 1316,64             | 52,08  | NELESYAYSLK       | HEL-S-89n      | 78 kDa glucose-regulated protein                                        |
| 1529,68                     | 0,50                               | 0,61                              | 0,60                                     | 1528,74             | 37,32  | AKFEELNMDLFR      |                |                                                                         |
| 976,43                      | 0,62                               | 0,35                              | 0,22                                     | 976,45              | 88,56  | AGFAGDDAPR        | ACTA2          | Actin, aortic smooth muscle                                             |
| 1198,65                     | 0,66                               | 0,29                              | 0,10                                     | 1198,52             | 57,19  | DSYVGDEAQS        |                |                                                                         |
| 1198,65                     | 0,66                               | 0,29                              | 0,10                                     | 1198,70             | 41,77  | AVFPSIVGRPR       |                |                                                                         |
| 1353,66                     | 0,51                               | 0,48                              | 0,47                                     | 1354,62             | 48,47  | DSYVGDEAQSKR      |                |                                                                         |
| 1580,68                     | 0,56                               | 0,45                              | 0,39                                     | 1580,80             | 43,04  | MQKEITALAPSTMK    |                |                                                                         |
| 1790,90                     | 0,57                               | 0,36                              | 0,27                                     | 1790,89             | 28,06  | SYELPDGQVITIGNER  |                |                                                                         |
| 1342,66                     | 0,57                               | 0,43                              | 0,35                                     | 1342,78             | 32,68  | VIQVAAGSSNLKR     | ALDH1B1        | Aldehyde dehydrogenase,<br>mitochondrial                                |
| 1230,65                     | 0,53                               | 0,46                              | 0,43                                     | 1229,68             | 27     | ELIIGDRQTGK       | ATP5F1A        | ATP synthase subunit alpha,<br>mitochondrial                            |
| 1358,66                     | 0,60                               | 0,41                              | 0,30                                     | 1358,74             | 34,89  | ISVREPMQTGIK      |                |                                                                         |
| 1127,64                     | 0,56                               | 0,47                              | 0,42                                     | 1126,64             | 32,56  | LEGDTLIIPR        | HSPG2          | Basement membrane-specific heparan<br>sulfate proteoglycan core protein |
| 1687,69                     | 0,56                               | 0,44                              | 0,38                                     | 1687,97             | 47,44  | VGGHLRPGIVQSGGVVR |                |                                                                         |
| 1790,90                     | 0,57                               | 0,36                              | 0,27                                     | 1790,89             | 28,06  | SYELPDGQVITIGNER  | ACTBL2         | Beta-actin-like protein 2                                               |
| 2026,93                     | 0,55                               | 0,53                              | 0,48                                     | 2027,13             | 31,14  | NHLVEIPPNLPSLVELR | BGN            | Biglycan                                                                |
| 1564,88                     | 0,59                               | 0,42                              | 0,33                                     | 1564,91             | 31,49  | SIVVSPILIPENQR    | CDH13          | Cadherin-13                                                             |
| 1835,91                     | 0,58                               | 0,44                              | 0,34                                     | 1836,84             | 32,84  | MTAFDADDPATDNALLR |                |                                                                         |
| 877,02                      | 0,51                               | 0,52                              | 0,51                                     | 876,46              | 59,95  | LPASFDAR          | CTSB           | Cathepsin B                                                             |
| 981,43                      | 0,45                               | 0,50                              | 0,54                                     | 981,63              | 32,21  | LLLPTPTVK         | CCAR1          | Cell division cycle and apoptosis                                       |

|         |      |      |      |         |       |                        |                     |                                                                                |
|---------|------|------|------|---------|-------|------------------------|---------------------|--------------------------------------------------------------------------------|
|         |      |      |      |         |       |                        | regulator protein 1 |                                                                                |
| 945,43  | 0,56 | 0,45 | 0,38 | 945,50  | 30,15 | LSENVDR                | CHCHD10             | Coiled-coil-helix-coiled-coil-helix domain-containing protein 3, mitochondrial |
| 836,42  | 0,59 | 0,42 | 0,31 | 836,44  | 49,08 | GPAGPQGPR              | COL1A1              | Collagen alpha-1(I) chain                                                      |
| 852,42  | 0,61 | 0,40 | 0,28 | 851,42  | 43,88 | GFSGLDGAK              |                     |                                                                                |
| 868,42  | 0,59 | 0,42 | 0,31 | 868,43  | 34,63 | GEAGPQGPR              |                     |                                                                                |
| 886,42  | 0,56 | 0,43 | 0,36 | 886,44  | 47,39 | GSEGPQGVR              |                     |                                                                                |
| 784,41  | 0,58 | 0,45 | 0,37 | 785,39  | 48,12 | GDQGPVGR               | COL1A2              | Collagen alpha-2(I) chain                                                      |
| 1223,65 | 0,53 | 0,47 | 0,45 | 1223,61 | 65,83 | GPAGPSGPAGKDGR         |                     |                                                                                |
| 1561,88 | 0,60 | 0,48 | 0,37 | 1562,79 | 87,57 | GETGPSGPVGPAGAVGPR     |                     |                                                                                |
| 2026,93 | 0,55 | 0,53 | 0,48 | 2027,01 | 39,23 | HGNRGETGPSGPVGPAGAVGPR |                     |                                                                                |
| 1214,65 | 0,54 | 0,46 | 0,42 | 1214,69 | 44,56 | LFAVAPNQNLK            | COL6A2              | Collagen alpha-2(VI) chain                                                     |
| 823,42  | 0,54 | 0,46 | 0,43 | 823,48  | 51,16 | VGLEHLR                | COL6A3              | Collagen alpha-3(VI) chain                                                     |
| 1237,65 | 0,57 | 0,43 | 0,37 | 1238,65 | 47,18 | VAVFFSNTPTR            |                     |                                                                                |
| 1459,67 | 0,61 | 0,43 | 0,32 | 1459,86 | 25,39 | IGDLHPQIVNLLK          |                     |                                                                                |
| 1462,67 | 0,55 | 0,44 | 0,39 | 1462,76 | 27,26 | QINVGNLEYVSR           |                     |                                                                                |
| 1106,64 | 0,58 | 0,42 | 0,32 | 1106,68 | 27,56 | VLTELYKK               | CKM                 | Creatine kinase M-type                                                         |
| 1302,66 | 0,57 | 0,48 | 0,41 | 1302,63 | 33,03 | GQSIDDMIPAQK           |                     |                                                                                |
| 1508,68 | 0,60 | 0,40 | 0,32 | 1507,80 | 83,26 | LSVEALNSLTGEFK         |                     |                                                                                |
| 1508,68 | 0,60 | 0,40 | 0,32 | 1507,70 | 58,36 | GGDDLDPNYVLSSR         |                     |                                                                                |
| 906,42  | 0,55 | 0,43 | 0,37 | 905,52  | 28,35 | LVPQQLAH               | COX5B               | Cytochrome c oxidase subunit 5B, mitochondrial                                 |
| 1352,66 | 0,52 | 0,44 | 0,43 | 1352,73 | 25,67 | ELHLDNNKLTR            | DCN                 | Decorin                                                                        |
| 1032,64 | 0,46 | 0,49 | 0,53 | 1032,54 | 88,47 | TSGGAGGLGSLR           | DES                 | Desmin                                                                         |
| 1729,70 | 0,55 | 0,45 | 0,40 | 1729,88 | 31,28 | VSDLTQAANKNNDALR       |                     |                                                                                |
| 1767,90 | 0,57 | 0,47 | 0,39 | 1768,83 | 32,75 | DGEVVSEATQQQHEVL       |                     |                                                                                |
| 2088,93 | 0,56 | 0,45 | 0,39 | 2088,09 | 51,57 | TFGGAPGFPLGSPLSPVFPR   |                     |                                                                                |
| 816,42  | 0,53 | 0,46 | 0,42 | 817,41  | 26,25 | DQQIGEK                | MCM2                | DNA replication licensing factor MCM2                                          |

|         |      |      |      |         |       |                     |         |                                                |
|---------|------|------|------|---------|-------|---------------------|---------|------------------------------------------------|
| 853,42  | 0,61 | 0,40 | 0,27 | 853,52  | 55,31 | LGPLQVAR            | ETFB    | Electron transfer flavoprotein subunit beta    |
| 1340,66 | 0,60 | 0,44 | 0,34 | 1339,72 | 51,07 | LSVISVEDPPQR        |         |                                                |
| 1134,44 | 0,56 | 0,43 | 0,38 | 1134,65 | 42,48 | SLNILTAFAQK         | ERP29   | Endoplasmic reticulum resident protein 29      |
| 1561,88 | 0,60 | 0,48 | 0,37 | 1562,82 | 30,26 | PYQYPALTPEQKK       | ALDOA   | Fructose-bisphosphate aldolase A               |
| 2038,93 | 0,53 | 0,47 | 0,44 | 2038,06 | 32,53 | VTGPEGALFEHSVETPLVR | SGCG    | Gamma-sarcoglycan                              |
| 1066,04 | 0,57 | 0,48 | 0,42 | 1065,59 | 31,49 | AGAHLQGGAKR         | GAPDH   | Glyceraldehyde-3-phosphate dehydrogenase       |
| 1231,65 | 0,58 | 0,44 | 0,35 | 1232,64 | 31,53 | AMTKDNNLLGR         | HSPA1A  | Heat shock 70 kDa protein 1A/1B                |
| 1302,66 | 0,57 | 0,48 | 0,41 | 1303,60 | 55,78 | NALESYAFNMK         |         |                                                |
| 1487,68 | 0,55 | 0,46 | 0,42 | 1487,70 | 46,55 | TTPSYVAFTDTER       |         |                                                |
| 1231,65 | 0,58 | 0,44 | 0,35 | 1232,64 | 31,53 | AMTKDNNLLGR         | HSPA6   | Heat shock 70 kDa protein 6                    |
| 1487,68 | 0,55 | 0,46 | 0,42 | 1487,70 | 46,55 | TTPSYVAFTDTER       |         |                                                |
| 1487,68 | 0,55 | 0,46 | 0,42 | 1487,70 | 46,55 | TTPSYVAFTDTER       | HSPA8   | Heat shock cognate 71 kDa protein              |
| 1487,68 | 0,55 | 0,46 | 0,42 | 1487,70 | 46,55 | TTPSYVAFTDTER       | HSPA2   | Heat shock-related 70 kDa protein 2            |
| 1529,68 | 0,50 | 0,61 | 0,60 | 1529,73 | 45,35 | VGAHAGEYGAELER      | HBA1    | Hemoglobin subunit alpha                       |
| 1628,69 | 0,51 | 0,44 | 0,43 | 1628,78 | 58,18 | SSGPYGGGGQYFAKPR    | HNRNPA1 | Heterogeneous nuclear ribonucleoprotein A1     |
| 944,43  | 0,57 | 0,45 | 0,37 | 943,57  | 36,36 | VPPPPPIAR           | HNRNPC  | Heterogeneous nuclear ribonucleoproteins C1/C2 |
| 974,43  | 0,56 | 0,43 | 0,38 | 973,60  | 45,36 | SGVSLAALKK          | H1-3    | Histone H1.3                                   |
| 1106,64 | 0,58 | 0,42 | 0,32 | 1107,57 | 47,87 | ALAAAGYDVEK         |         |                                                |
| 1198,65 | 0,66 | 0,29 | 0,10 | 1198,67 | 64,14 | ASGPPVSELITK        |         |                                                |
| 1326,66 | 0,54 | 0,46 | 0,41 | 1326,76 | 42,44 | KASGPPVSELITK       |         |                                                |
| 1106,64 | 0,58 | 0,42 | 0,32 | 1107,57 | 47,87 | ALAAAGYDVEK         | H1-6    | Histone H1t                                    |
| 1341,66 | 0,58 | 0,42 | 0,34 | 1341,77 | 27,41 | ALVQNDTLLQVK        | H1-10   | Histone H1x                                    |
| 944,43  | 0,57 | 0,45 | 0,37 | 944,53  | 61,97 | AGLQFPVGR           | H2AC18  | Histone H2A type 2-A                           |
| 1743,70 | 0,59 | 0,47 | 0,38 | 1743,82 | 88,66 | AMGIMNSFVNDIFER     | H2BC3   | Histone H2B type 1-B                           |

|         |      |      |      |         |       |                       |       |                                        |
|---------|------|------|------|---------|-------|-----------------------|-------|----------------------------------------|
| 688,40  | 0,61 | 0,44 | 0,33 | 688,43  | 27,64 | KQLATK                | H3-4  | Histone H3.1t                          |
| 688,40  | 0,61 | 0,44 | 0,33 | 688,41  | 35,49 | VTIMPK                |       |                                        |
| 1032,64 | 0,46 | 0,49 | 0,53 | 1032,59 | 28,91 | YRPGTVALR             |       |                                        |
| 1325,66 | 0,59 | 0,44 | 0,36 | 1325,75 | 45,61 | DNIQGITKPAIR          | H4C1  | Histone H4                             |
| 1466,67 | 0,60 | 0,42 | 0,32 | 1466,80 | 61,03 | TVTAMDVVYALKR         |       |                                        |
| 1481,68 | 0,54 | 0,46 | 0,42 | 1481,85 | 29,78 | DNIQGITKPAIRR         |       |                                        |
| 852,42  | 0,61 | 0,40 | 0,28 | 851,44  | 26,56 | DTLMISR               | IGHG1 | Ig gamma-1 chain C region              |
| 1710,90 | 0,60 | 0,36 | 0,26 | 1710,81 | 25,14 | FEAAETLEEAAMRSR       | KLC1  | Kinesin light chain 1                  |
| 1848,91 | 0,56 | 0,46 | 0,41 | 1848,87 | 52,86 | AGNSLAASTAEETAGSAQGR  | LAMB2 | Laminin subunit beta-2                 |
| 1324,66 | 0,59 | 0,43 | 0,34 | 1324,71 | 33,76 | SASYNLSLTLQK          | LDB3  | LIM domain-binding protein 3           |
| 1648,69 | 0,54 | 0,48 | 0,44 | 1648,88 | 61,58 | GGPAYTPAGPQVPPLAR     |       |                                        |
| 1303,66 | 0,62 | 0,36 | 0,24 | 1303,68 | 41,21 | PMFIVNTNVPR           | MIF   | Macrophage migration inhibitory factor |
| 644,00  | 0,54 | 0,49 | 0,43 | 643,41  | 33,2  | AQIALK                | MDH1  | Malate dehydrogenase, cytoplasmic      |
| 1060,04 | 0,53 | 0,49 | 0,42 | 1060,54 | 34,27 | DFADIPNLR             | OGN   | Mimecan                                |
| 2027,93 | 0,57 | 0,52 | 0,45 | 2027,97 | 32,96 | TETTMSPNTNTTTSQGTTR   | MUC5B | Mucin-5B                               |
| 877,02  | 0,51 | 0,52 | 0,51 | 876,53  | 44,21 | ALELFRK               | MB    | Myoglobin                              |
| 1478,68 | 0,59 | 0,45 | 0,35 | 1478,90 | 70,53 | HGATVLTALGGILKK       |       |                                        |
| 1264,46 | 0,48 | 0,51 | 0,53 | 1263,60 | 47,85 | ESNGTVMGAELR          | MYL4  | Myosin light chain 4                   |
| 1888,91 | 0,59 | 0,48 | 0,37 | 1888,00 | 33,26 | VLDFEHFLPMLQTVAK      | MYL6  | Myosin light polypeptide 6             |
| 1060,04 | 0,53 | 0,49 | 0,42 | 1060,51 | 50,2  | ANSEVAQWR             | MYH13 | Myosin-13                              |
| 1060,04 | 0,53 | 0,49 | 0,42 | 1060,51 | 50,2  | ANSEVAQWR             | MYH3  | Myosin-3                               |
| 1060,04 | 0,53 | 0,49 | 0,42 | 1060,51 | 50,2  | ANSEVAQWR             | MYO6  | Myosin-6                               |
| 1082,04 | 0,51 | 0,52 | 0,52 | 1081,53 | 50,48 | SLNDFTTQR             |       |                                        |
| 1533,68 | 0,58 | 0,44 | 0,34 | 1533,78 | 82,04 | VVDSLQTSLEDAETR       |       |                                        |
| 1768,90 | 0,54 | 0,47 | 0,42 | 1768,96 | 66,66 | ILNPVAIPEGQFIDSR      |       |                                        |
| 1850,91 | 0,59 | 0,44 | 0,34 | 1851,04 | 48,84 | VQLLHSQNTSLINQKK      |       |                                        |
| 1966,92 | 0,56 | 0,48 | 0,41 | 1967,02 | 30,33 | DLEEATLQHEATAAALRK    |       |                                        |
| 2088,93 | 0,56 | 0,45 | 0,39 | 2088,12 | 33,09 | YRILNPVAIPEGQFIDSR    |       |                                        |
| 2199,94 | 0,57 | 0,46 | 0,39 | 2200,12 | 49,68 | GTLEDQIIQANPALEAFGNAK |       |                                        |



|         |      |      |      |         |       |                       |         |                                                   |
|---------|------|------|------|---------|-------|-----------------------|---------|---------------------------------------------------|
| 1060,04 | 0,53 | 0,49 | 0,42 | 1060,51 | 50,2  | ANSEVAQWR             | MYH7    | Myosin-7                                          |
| 1533,68 | 0,58 | 0,44 | 0,34 | 1533,78 | 82,04 | VVDSLQTS LDAETR       |         |                                                   |
| 1850,91 | 0,59 | 0,44 | 0,34 | 1851,04 | 48,84 | VQLLHSQNTSLINQKK      |         |                                                   |
| 1966,92 | 0,56 | 0,48 | 0,41 | 1967,02 | 30,33 | DLEEATLQHEATAAALRK    |         |                                                   |
| 2199,94 | 0,57 | 0,46 | 0,39 | 2200,12 | 49,68 | GTLEDQIIQANPALEAFGNAK |         |                                                   |
| 1848,91 | 0,56 | 0,46 | 0,41 | 1848,90 | 37,01 | SVEVAAGSPAVFEAETER    | MYBPC3  | Myosin-binding protein C, cardiac-type            |
| 1572,68 | 0,52 | 0,47 | 0,46 | 1572,77 | 49,39 | DIMLEELSHLSNR         | MYOZ2   | Myozenin-2                                        |
| 1723,70 | 0,57 | 0,42 | 0,35 | 1723,86 | 47,13 | SPPNPDNIAPGYSGPLK     |         |                                                   |
| 1359,66 | 0,63 | 0,40 | 0,26 | 1359,67 | 25,52 | LLEENQESLR            | NES     | Nestin                                            |
| 1094,64 | 0,63 | 0,37 | 0,23 | 1095,56 | 25,48 | KITIADCGQF            | PPIAL4A | Peptidyl-prolyl cis-trans isomerase A-like 4A/B/C |
| 1106,64 | 0,58 | 0,42 | 0,32 | 1107,60 | 25,88 | TIAQDYGV LK           | PRDX1   | Peroxiredoxin-1                                   |
| 1096,64 | 0,59 | 0,42 | 0,32 | 1097,62 | 51,55 | VLPGV DALSNI          | PGK1    | Phosphoglycerate kinase 1                         |
| 976,43  | 0,62 | 0,35 | 0,22 | 975,49  | 36,63 | AMEAVAAQ GK           | PGAM2   | Phosphoglycerate mutase 2                         |
| 1150,65 | 0,56 | 0,43 | 0,38 | 1150,67 | 45,55 | VLIAAHGNSLR           |         |                                                   |
| 976,43  | 0,62 | 0,35 | 0,22 | 976,45  | 88,56 | AGFAGDDAPR            | POTEE   | POTE ankyrin domain family member E               |
| 1199,65 | 0,65 | 0,30 | 0,12 | 1198,71 | 33,51 | AVFPSIVGRPR           |         |                                                   |
| 1790,90 | 0,57 | 0,36 | 0,27 | 1790,89 | 28,06 | SYELPDGQVITIGNER      |         |                                                   |
| 1967,92 | 0,51 | 0,47 | 0,46 | 1968,08 | 25,89 | VAPEEHPILLTEAPLNPK    |         |                                                   |
| 976,43  | 0,62 | 0,35 | 0,22 | 976,45  | 88,56 | AGFAGDDAPR            | POTEF   | POTE ankyrin domain family member F               |
| 1199,65 | 0,65 | 0,30 | 0,12 | 1198,71 | 33,51 | AVFPSIVGRPR           |         |                                                   |
| 1790,90 | 0,57 | 0,36 | 0,27 | 1790,89 | 28,06 | SYELPDGQVITIGNER      |         |                                                   |
| 976,43  | 0,62 | 0,35 | 0,22 | 976,45  | 88,56 | AGFAGDDAPR            | POTEI   | POTE ankyrin domain family member I               |
| 1199,65 | 0,65 | 0,30 | 0,12 | 1198,71 | 33,51 | AVFPSIVGRPR           |         |                                                   |
| 1967,92 | 0,51 | 0,47 | 0,46 | 1968,08 | 25,89 | VAPEEHPILLTEAPLNPK    |         |                                                   |
| 976,43  | 0,62 | 0,35 | 0,22 | 976,45  | 88,56 | AGFAGDDAPR            | POTEJ   | POTE ankyrin domain family                        |

|         |      |      |      |         |       |                    |          |                                                                         |
|---------|------|------|------|---------|-------|--------------------|----------|-------------------------------------------------------------------------|
|         |      |      |      |         |       |                    | member J |                                                                         |
| 1967,92 | 0,51 | 0,47 | 0,46 | 1968,08 | 25,89 | VAPEEHPILLTEAPLNPK |          |                                                                         |
| 1565,88 | 0,54 | 0,44 | 0,40 | 1566,75 | 43,84 | SVGGSGGGSGFDNLVTR  | LMNA     | Prelamin-A/C                                                            |
| 1564,88 | 0,59 | 0,42 | 0,33 | 1565,86 | 29,41 | NLMQLNLAHNILR      | PRELP    | Prolargin                                                               |
| 1790,90 | 0,57 | 0,36 | 0,27 | 1790,89 | 28,06 | SYELPDGQVITIGNER   | POTEKP   | Putative beta-actin-like protein 3                                      |
| 1967,92 | 0,51 | 0,47 | 0,46 | 1968,08 | 25,89 | VAPEEHPILLTEAPLNPK |          |                                                                         |
| 1461,67 | 0,58 | 0,42 | 0,33 | 1461,75 | 27,91 | ISPEEVYNNLKR       | NSUN7    | Putative methyltransferase NSUN7                                        |
| 840,42  | 0,59 | 0,48 | 0,38 | 840,47  | 26,42 | RLNNAPR            | SHISA8   | Putative protein shisa-8                                                |
| 1321,66 | 0,63 | 0,37 | 0,24 | 1321,74 | 51,46 | DEILLHQAAAK        | SLMAP    | Sarcolemmal membrane-associated protein                                 |
| 1391,67 | 0,46 | 0,48 | 0,52 | 1391,72 | 25,9  | AEIGIAMGSGTAVAK    | ATP2A2   | Sarcoplasmic/endoplasmic reticulum calcium ATPase 2                     |
| 1776,90 | 0,59 | 0,46 | 0,35 | 1777,87 | 33,2  | SDGDPVQPAVLQVHQTS  | SDPR     | Serum deprivation-response protein                                      |
| 1107,64 | 0,61 | 0,44 | 0,31 | 1108,59 | 32,94 | ITALDEFATK         | Sptan1   | Spectrin alpha chain, non-erythrocytic 1                                |
| 899,42  | 0,56 | 0,46 | 0,39 | 899,55  | 25,53 | AAVVALSLR          | SDHB     | Succinate dehydrogenase [ubiquinone] iron-sulfur subunit, mitochondrial |
| 1302,66 | 0,57 | 0,48 | 0,41 | 1302,74 | 29,55 | SLRFPLALEEK        | TTN      | Titin                                                                   |
| 1315,66 | 0,51 | 0,42 | 0,42 | 1315,72 | 29,24 | AGEDVQVLIPFK       |          |                                                                         |
| 1602,69 | 0,56 | 0,44 | 0,37 | 1602,89 | 31,2  | VVLAYEPVWAIGTGK    | TPI1     | Triosephosphate isomerase                                               |
| 875,42  | 0,57 | 0,44 | 0,37 | 875,45  | 30,27 | SLEAQAEK           | TPM1     | Tropomyosin alpha-1 chain                                               |
| 1314,66 | 0,50 | 0,41 | 0,42 | 1314,76 | 40,4  | KLVIIESDLER        |          |                                                                         |
| 1460,67 | 0,62 | 0,43 | 0,31 | 1460,73 | 39,4  | KATDAEADVASLNR     |          |                                                                         |
| 1488,68 | 0,55 | 0,45 | 0,41 | 1488,74 | 27,75 | ATDAEADVASLNRR     |          |                                                                         |
| 1516,68 | 0,61 | 0,43 | 0,32 | 1516,82 | 27,34 | SKQLEDELVSLQK      |          |                                                                         |
| 875,42  | 0,57 | 0,44 | 0,37 | 875,45  | 30,27 | SLEAQAEK           | TPM3     | Tropomyosin alpha-3 chain                                               |
| 1460,67 | 0,62 | 0,43 | 0,31 | 1460,73 | 39,4  | KATDAEADVASLNR     | TPM2     | Tropomyosin beta chain                                                  |
| 1488,68 | 0,55 | 0,45 | 0,41 | 1488,74 | 27,75 | ATDAEADVASLNRR     |          |                                                                         |

|         |      |      |      |         |       |                        |         |                            |
|---------|------|------|------|---------|-------|------------------------|---------|----------------------------|
| 1305,66 | 0,58 | 0,41 | 0,34 | 1306,64 | 44,38 | KNIDALSGMEGR           | TNNI3   | Troponin I, cardiac muscle |
| 1479,68 | 0,54 | 0,43 | 0,40 | 1479,73 | 42,27 | ISADAMMQALLGAR         |         |                            |
| 1889,91 | 0,57 | 0,46 | 0,38 | 1890,03 | 44,46 | NITEIADLTQKIFDLR       |         |                            |
| 758,41  | 0,55 | 0,45 | 0,40 | 757,47  | 35,39 | ILAERR                 | TNNT2   | Troponin T, cardiac muscle |
| 906,42  | 0,55 | 0,43 | 0,37 | 906,50  | 26,65 | YEINVLR                |         |                            |
| 1797,90 | 0,57 | 0,46 | 0,40 | 1796,93 | 29,11 | SFMPNLVPPKIPDGER       |         |                            |
| 1143,45 | 0,60 | 0,42 | 0,31 | 1143,63 | 28,94 | LAVNMVPFPR             | TUBB    | Tubulin beta chain         |
| 1320,66 | 0,64 | 0,38 | 0,24 | 1319,70 | 49,82 | IMNTFSVVPSPK           |         |                            |
| 1621,69 | 0,52 | 0,47 | 0,46 | 1620,83 | 34,82 | LHFFMPGFAPLTSR         |         |                            |
| 1143,45 | 0,60 | 0,42 | 0,31 | 1143,63 | 28,94 | LAVNMVPFPR             | TUBB1   | Tubulin beta-1 chain       |
| 1143,45 | 0,60 | 0,42 | 0,31 | 1143,63 | 28,94 | LAVNMVPFPR             | TUBB3   | Tubulin beta-3 chain       |
| 1320,66 | 0,64 | 0,38 | 0,24 | 1319,70 | 49,82 | IMNTFSVVPSPK           |         |                            |
| 1143,45 | 0,60 | 0,42 | 0,31 | 1143,63 | 28,94 | LAVNMVPFPR             | TUBB4B  | Tubulin beta-4B chain      |
| 1320,66 | 0,64 | 0,38 | 0,24 | 1319,70 | 49,82 | IMNTFSVVPSPK           |         |                            |
| 1602,69 | 0,56 | 0,44 | 0,37 | 1601,82 | 30,14 | AVLVDLEPGTMDSVR        |         |                            |
| 1620,69 | 0,54 | 0,47 | 0,43 | 1620,83 | 34,82 | LHFFMPGFAPLTSR         |         |                            |
| 1143,45 | 0,60 | 0,42 | 0,31 | 1143,63 | 28,94 | LAVNMVPFPR             | TUBB6   | Tubulin beta-6 chain       |
| 1620,69 | 0,54 | 0,47 | 0,43 | 1620,83 | 34,82 | LHFFMPGFAPLTSR         |         |                            |
| 1143,45 | 0,60 | 0,42 | 0,31 | 1143,63 | 28,94 | LAVNMVPFPR             | TUBB8   | Tubulin beta-8 chain       |
| 1602,69 | 0,56 | 0,44 | 0,37 | 1601,82 | 30,14 | AVLVDLEPGTMDSVR        |         |                            |
| 1620,69 | 0,54 | 0,47 | 0,43 | 1620,83 | 34,82 | LHFFMPGFAPLTSR         |         |                            |
| 1320,66 | 0,64 | 0,38 | 0,24 | 1320,71 | 38,4  | TSAALSTVGSISR          | TPD52L2 | Tumor protein D54          |
| 1269,66 | 0,56 | 0,43 | 0,37 | 1270,56 | 37,39 | LGDLYEEEMR             | VIM     | Vimentin                   |
| 1428,67 | 0,55 | 0,33 | 0,28 | 1428,71 | 40,41 | SLYASSPGGVYATR         |         |                            |
| 2498,17 | 0,55 | 0,49 | 0,44 | 2497,26 | 42,86 | LLQDSVDFSLADAINTEFKNTR |         |                            |
| 1503,68 | 0,56 | 0,46 | 0,40 | 1503,83 | 25,29 | IYISGMAPRPSLAK         | VTN     | Vitronectin                |
